# Supplementary material
Source: PubMed Central journal article supplement (PMC3531553)
Supplement: NIHMS427979-supplement-Table_S5.pdf [file NIHMS427979-supplement-Table_S5.pdf]

Table S5. List of all lipid molecular species identified from Calu-3 cells using capillary UPLC-MS and the HSS T3 material. The chain length denotes the total number of acyl carbons followed by total double bonds.

| Molecular Species        | Formula                                         | Formula Mass<br>(isotopic) | Expected<br><i>m/z</i> | Observed<br><i>m/z</i> | Ion Type                          | Mass Error<br>(ppm) | Retention<br>Time (min) | Ion<br>Intensity |
|--------------------------|-------------------------------------------------|----------------------------|------------------------|------------------------|-----------------------------------|---------------------|-------------------------|------------------|
| 18:2 Cholesteryl ester   | C <sub>45</sub> H <sub>76</sub> O <sub>2</sub>  | 648.5845                   | 666.6189               | 666.6169               | [M+NH <sub>4</sub> ] <sup>+</sup> | -3.0                | 67.82                   | 2.04E+05         |
| 20:4 Cholesteryl ester   | C <sub>47</sub> H <sub>76</sub> O <sub>2</sub>  | 672.5845                   | 690.6189               | 690.6165               | [M+NH <sub>4</sub> ] <sup>+</sup> | -3.4                | 66.90                   | 2.41E+05         |
| 20:5 Cholesteryl ester   | C <sub>47</sub> H <sub>74</sub> O <sub>2</sub>  | 670.5689                   | 688.6032               | 688.6011               | [M+NH <sub>4</sub> ] <sup>+</sup> | -3.1                | 65.83                   | 2.27E+05         |
| alpha-hydroxycholestanol | C <sub>27</sub> H <sub>48</sub> O <sub>2</sub>  | 404.3654                   | 422.3998               | 422.3986               | [M+NH <sub>4</sub> ] <sup>+</sup> | -2.8                | 25.14                   | 1.93E+05         |
| Cer(d42:1)               | C <sub>42</sub> H <sub>83</sub> NO <sub>3</sub> | 649.6373                   | 650.6451               | 650.6430               | [M+H] <sup>+</sup>                | -3.2                | 57.52                   | 2.15E+06         |
| Cer(d42:2)               | C <sub>42</sub> H <sub>81</sub> NO <sub>3</sub> | 647.6216                   | 648.6294               | 648.6275               | [M+H] <sup>+</sup>                | -3.0                | 51.28                   | 1.42E+06         |
| Cholesterol              | C <sub>27</sub> H <sub>46</sub> O               | 386.3549                   | 404.3892               | 404.3873               | [M+NH <sub>4</sub> ] <sup>+</sup> | -4.8                | 35.13                   | 5.05E+05         |
| DG(32:0)                 | C <sub>35</sub> H <sub>68</sub> O <sub>5</sub>  | 568.5066                   | 586.5410               | 586.5384               | [M+NH <sub>4</sub> ] <sup>+</sup> | -4.4                | 48.47                   | 4.03E+05         |
| DG(34:0)                 | C <sub>37</sub> H <sub>72</sub> O <sub>5</sub>  | 596.5379                   | 614.5723               | 614.5698               | [M+NH <sub>4</sub> ] <sup>+</sup> | -4.1                | 53.22                   | 2.85E+05         |
| DG(34:1)                 | C <sub>37</sub> H <sub>70</sub> O <sub>5</sub>  | 594.5223                   | 612.5567               | 612.5545               | [M+NH <sub>4</sub> ] <sup>+</sup> | -3.6                | 49.15                   | 4.19E+06         |
| DG(36:1)                 | C <sub>39</sub> H <sub>74</sub> O <sub>5</sub>  | 622.5536                   | 640.5880               | 640.5856               | [M+NH <sub>4</sub> ] <sup>+</sup> | -3.6                | 53.25                   | 1.59E+06         |
| DG(36:2)                 | C <sub>39</sub> H <sub>72</sub> O <sub>5</sub>  | 620.5379                   | 638.5723               | 638.5702               | [M+NH <sub>4</sub> ] <sup>+</sup> | -3.4                | 49.69                   | 9.76E+05         |
| DG(38:2)                 | C <sub>41</sub> H <sub>76</sub> O <sub>5</sub>  | 648.5692                   | 666.6036               | 666.6011               | [M+NH <sub>4</sub> ] <sup>+</sup> | -3.7                | 53.11                   | 6.88E+05         |
| DG(38:3)                 | C <sub>41</sub> H <sub>74</sub> O <sub>5</sub>  | 646.5536                   | 664.5880               | 664.5862               | [M+NH <sub>4</sub> ] <sup>+</sup> | -2.7                | 51.71                   | 2.92E+05         |
| DG(38:4)                 | C <sub>41</sub> H <sub>72</sub> O <sub>5</sub>  | 644.5379                   | 662.5723               | 662.5701               | [M+NH <sub>4</sub> ] <sup>+</sup> | -3.4                | 49.15                   | 5.55E+05         |
| DG(40:1)                 | C <sub>43</sub> H <sub>82</sub> O <sub>5</sub>  | 678.6162                   | 696.6506               | 696.6485               | [M+NH <sub>4</sub> ] <sup>+</sup> | -2.9                | 57.92                   | 3.99E+05         |
| DG(40:2)                 | C <sub>43</sub> H <sub>80</sub> O <sub>5</sub>  | 676.6005                   | 694.6349               | 694.6323               | [M+NH <sub>4</sub> ] <sup>+</sup> | -3.7                | 56.37                   | 3.71E+05         |
| DG(42:1)                 | C <sub>45</sub> H <sub>86</sub> O <sub>5</sub>  | 706.6475                   | 724.6819               | 724.6805               | [M+NH <sub>4</sub> ] <sup>+</sup> | -1.9                | 60.43                   | 3.12E+05         |
| DG(42:2)                 | C <sub>45</sub> H <sub>84</sub> O <sub>5</sub>  | 704.6318                   | 722.6662               | 722.6642               | [M+NH <sub>4</sub> ] <sup>+</sup> | -2.8                | 58.85                   | 3.74E+05         |
| FA(13:0)                 | C <sub>13</sub> H <sub>26</sub> O <sub>2</sub>  | 214.1933                   | 213.1854               | 213.1866               | [M-H] <sup>-</sup>                | 5.3                 | 16.45                   | 1.24E+05         |
| FA(14:0)                 | C <sub>14</sub> H <sub>28</sub> O <sub>2</sub>  | 228.2089                   | 227.2011               | 227.2021               | [M-H] <sup>-</sup>                | 4.3                 | 19.23                   | 2.45E+05         |
| FA(15:0)                 | C <sub>15</sub> H <sub>30</sub> O <sub>2</sub>  | 242.2246                   | 241.2167               | 241.2178               | [M-H] <sup>-</sup>                | 4.3                 | 20.43                   | 1.12E+06         |
| FA(16:0)                 | C <sub>16</sub> H <sub>32</sub> O <sub>2</sub>  | 256.2402                   | 255.2324               | 255.2326               | [M-H] <sup>-</sup>                | 0.7                 | 22.19                   | 2.26E+07         |
| FA(16:1)                 | C <sub>16</sub> H <sub>30</sub> O <sub>2</sub>  | 254.2246                   | 253.2167               | 253.2176               | [M-H] <sup>-</sup>                | 3.3                 | 18.31                   | 3.08E+05         |
| FA(17:0)                 | C <sub>17</sub> H <sub>34</sub> O <sub>2</sub>  | 270.2559                   | 269.2480               | 269.2491               | [M-H] <sup>-</sup>                | 3.8                 | 23.18                   | 1.71E+06         |
| FA(17:1)                 | C <sub>17</sub> H <sub>32</sub> O <sub>2</sub>  | 268.2402                   | 267.2324               | 267.2330               | [M-H] <sup>-</sup>                | 2.2                 | 21.24                   | 1.53E+05         |
| FA(18:0)                 | C <sub>18</sub> H <sub>36</sub> O <sub>2</sub>  | 284.2715                   | 283.2637               | 283.2643               | [M-H] <sup>-</sup>                | 2.0                 | 27.44                   | 1.66E+06         |
| FA(18:1)                 | C <sub>18</sub> H <sub>34</sub> O <sub>2</sub>  | 282.2559                   | 281.2480               | 281.2487               | [M-H] <sup>-</sup>                | 2.2                 | 22.84                   | 3.53E+06         |
| FA(18:2)                 | C <sub>18</sub> H <sub>32</sub> O <sub>2</sub>  | 280.2402                   | 279.2324               | 279.2333               | [M-H] <sup>-</sup>                | 3.1                 | 20.35                   | 9.44E+05         |

|                                       |                                                   |          |          |          |        |      |       |          |
|---------------------------------------|---------------------------------------------------|----------|----------|----------|--------|------|-------|----------|
| FA(18:3)                              | C <sub>18</sub> H <sub>30</sub> O <sub>2</sub>    | 278.2246 | 277.2167 | 277.2178 | [M-H]- | 3.7  | 17.59 | 8.68E+04 |
| FA(20:0)                              | C <sub>20</sub> H <sub>40</sub> O <sub>2</sub>    | 312.3028 | 311.2950 | 311.2957 | [M-H]- | 2.2  | 29.52 | 1.47E+05 |
| FA(20:1)                              | C <sub>20</sub> H <sub>38</sub> O <sub>2</sub>    | 310.2872 | 309.2794 | 309.2801 | [M-H]- | 2.3  | 25.67 | 1.03E+06 |
| FA(20:2)                              | C <sub>20</sub> H <sub>36</sub> O <sub>2</sub>    | 308.2715 | 307.2637 | 307.2645 | [M-H]- | 2.5  | 22.96 | 2.86E+05 |
| FA(20:3)                              | C <sub>20</sub> H <sub>34</sub> O <sub>2</sub>    | 306.2559 | 305.2481 | 305.2488 | [M-H]- | 2.3  | 21.52 | 1.15E+05 |
| FA(20:4)                              | C <sub>20</sub> H <sub>32</sub> O <sub>2</sub>    | 304.2402 | 303.2324 | 303.2333 | [M-H]- | 2.9  | 18.90 | 2.15E+05 |
| FA(20:5)                              | C <sub>20</sub> H <sub>30</sub> O <sub>2</sub>    | 302.2246 | 301.2167 | 301.2177 | [M-H]- | 3.1  | 17.11 | 8.33E+05 |
| FA(22:1)                              | C <sub>22</sub> H <sub>42</sub> O <sub>2</sub>    | 338.3185 | 337.3106 | 337.3112 | [M-H]- | 1.6  | 29.06 | 1.23E+05 |
| FA(22:2)                              | C <sub>22</sub> H <sub>40</sub> O <sub>2</sub>    | 336.3028 | 335.2950 | 335.2956 | [M-H]- | 1.8  | 26.25 | 9.24E+04 |
| FA(22:4)                              | C <sub>22</sub> H <sub>36</sub> O <sub>2</sub>    | 332.2715 | 331.2637 | 331.2635 | [M-H]- | -0.7 | 22.10 | 3.88E+05 |
| FA(22:5)                              | C <sub>22</sub> H <sub>34</sub> O <sub>2</sub>    | 330.2559 | 329.2481 | 329.2491 | [M-H]- | 3.0  | 19.51 | 1.77E+05 |
| FA(22:6)                              | C <sub>22</sub> H <sub>32</sub> O <sub>2</sub>    | 328.2402 | 327.2324 | 327.2334 | [M-H]- | 3.0  | 18.19 | 3.94E+05 |
| FA(24:0)                              | C <sub>24</sub> H <sub>48</sub> O <sub>2</sub>    | 368.3654 | 367.3576 | 367.3583 | [M-H]- | 1.9  | 41.17 | 2.64E+05 |
| FA(24:1)                              | C <sub>24</sub> H <sub>46</sub> O <sub>2</sub>    | 366.3497 | 365.3419 | 365.3429 | [M-H]- | 2.7  | 33.41 | 2.12E+05 |
| FA(26:0)                              | C <sub>26</sub> H <sub>52</sub> O <sub>2</sub>    | 396.3967 | 395.3889 | 395.3898 | [M-H]- | 2.2  | 48.19 | 2.07E+05 |
| FA(26:1)                              | C <sub>26</sub> H <sub>50</sub> O <sub>2</sub>    | 394.3811 | 393.3732 | 393.3741 | [M-H]- | 2.1  | 39.11 | 7.89E+04 |
| GlcCer(d18:1/24:1)                    | C <sub>48</sub> H <sub>91</sub> NO <sub>8</sub>   | 809.6744 | 810.6823 | 810.6811 | [M+H]+ | -1.4 | 53.97 | 7.44E+05 |
| LacCer(d18:1/16:0)                    | C <sub>46</sub> H <sub>87</sub> NO <sub>13</sub>  | 861.6177 | 862.6255 | 862.6234 | [M+H]+ | -2.5 | 31.28 | 6.25E+05 |
| LacCer(d18:1/24:0)                    | C <sub>54</sub> H <sub>103</sub> NO <sub>13</sub> | 973.7429 | 974.7507 | 974.7479 | [M+H]+ | -2.9 | 50.29 | 1.12E+06 |
| LacCer(d18:1/24:1)                    | C <sub>54</sub> H <sub>101</sub> NO <sub>13</sub> | 971.7273 | 972.7351 | 972.7315 | [M+H]+ | -3.6 | 48.16 | 7.01E+05 |
| LPA(14:0)                             | C <sub>17</sub> H <sub>35</sub> O <sub>7</sub> P  | 382.2120 | 381.2042 | 381.2053 | [M-H]- | 2.8  | 11.52 | 3.81E+04 |
| LPC(14:0)                             | C <sub>22</sub> H <sub>46</sub> NO <sub>7</sub> P | 467.3012 | 468.3090 | 468.3081 | [M+H]+ | -1.9 | 13.19 | 9.03E+05 |
| LPC(16:0) or PC(O-16:0)               | C <sub>24</sub> H <sub>50</sub> NO <sub>7</sub> P | 495.3325 | 496.3403 | 496.3390 | [M+H]+ | -2.6 | 16.07 | 1.39E+07 |
| LPC(16:1)                             | C <sub>24</sub> H <sub>48</sub> NO <sub>7</sub> P | 493.3168 | 494.3246 | 494.3245 | [M+H]+ | -0.3 | 13.82 | 1.06E+06 |
| LPC(17:0)                             | C <sub>25</sub> H <sub>52</sub> NO <sub>7</sub> P | 509.3481 | 510.3559 | 510.3551 | [M+H]+ | -1.7 | 16.93 | 1.82E+05 |
| LPC(18:0) or PC(O-18:0)               | C <sub>26</sub> H <sub>54</sub> NO <sub>7</sub> P | 523.3638 | 524.3716 | 524.3705 | [M+H]+ | -2.0 | 19.83 | 3.03E+06 |
| LPC(18:1) or PC(O-18:1) or PC(P-18:0) | C <sub>26</sub> H <sub>52</sub> NO <sub>7</sub> P | 521.3481 | 522.3559 | 522.3546 | [M+H]+ | -2.6 | 14.82 | 8.33E+05 |
| LPC(18:2)                             | C <sub>26</sub> H <sub>50</sub> NO <sub>7</sub> P | 519.3325 | 520.3403 | 520.3399 | [M+H]+ | -0.7 | 13.91 | 7.27E+05 |
| LPC(19:0) or PC(O-19:0)               | C <sub>27</sub> H <sub>56</sub> NO <sub>7</sub> P | 537.3794 | 538.3872 | 538.3870 | [M+H]+ | -0.4 | 21.39 | 6.92E+04 |
| LPC(19:1)                             | C <sub>27</sub> H <sub>54</sub> NO <sub>7</sub> P | 535.3638 | 536.3716 | 536.3698 | [M+H]+ | -3.3 | 17.65 | 1.45E+05 |
| LPC(20:3)                             | C <sub>28</sub> H <sub>52</sub> NO <sub>7</sub> P | 545.3481 | 546.3559 | 546.3529 | [M+H]+ | -5.6 | 19.15 | 9.38E+04 |
| LPC(20:4)                             | C <sub>28</sub> H <sub>50</sub> NO <sub>7</sub> P | 543.3325 | 544.3403 | 544.3366 | [M+H]+ | -6.7 | 16.12 | 2.91E+05 |
| LPC(20:5)                             | C <sub>28</sub> H <sub>48</sub> NO <sub>7</sub> P | 541.3168 | 542.3246 | 542.3240 | [M+H]+ | -1.2 | 12.28 | 6.67E+04 |
| LPC(22:1)                             | C <sub>30</sub> H <sub>60</sub> NO <sub>7</sub> P | 577.4107 | 578.4185 | 578.4178 | [M+H]+ | -1.3 | 22.54 | 9.03E+04 |

|                                 |            |          |          |          |        |      |       |          |
|---------------------------------|------------|----------|----------|----------|--------|------|-------|----------|
| LPC(22:6)                       | C30H50NO7P | 567.3325 | 568.3403 | 568.3401 | [M+H]+ | -0.4 | 13.12 | 1.34E+05 |
| LPC(O-16:0) or PC(O-8:0/O-8:0)  | C24H52NO6P | 481.3532 | 482.3610 | 482.3599 | [M+H]+ | -2.3 | 16.87 | 2.56E+06 |
| LPC(O-16:1) or LPC(P-16:0)      | C24H50NO6P | 479.3376 | 480.3454 | 480.3442 | [M+H]+ | -2.5 | 16.09 | 4.67E+05 |
| LPC(O-17:0) or PC(O-16:0/O-1:0) | C25H54NO6P | 495.3689 | 496.3767 | 496.3768 | [M+H]+ | 0.1  | 18.23 | 4.11E+04 |
| LPC(O-18:0) or PC(O-16:0/O-2:0) | C26H56NO6P | 509.3845 | 510.3923 | 510.3923 | [M+H]+ | -0.1 | 21.10 | 3.45E+06 |
| LPC(O-20:0) or PC(O-18:0/O-2:0) | C28H60NO6P | 537.4158 | 538.4236 | 538.4225 | [M+H]+ | -2.0 | 25.00 | 9.27E+05 |
| LPC(P-18:1)                     | C26H52NO6P | 505.3532 | 506.3610 | 506.3600 | [M+H]+ | -2.1 | 16.74 | 1.95E+05 |
| LPE(16:0)                       | C21H44NO7P | 453.2855 | 454.2933 | 454.2922 | [M+H]+ | -2.6 | 16.59 | 9.06E+05 |
| LPE(16:1)                       | C21H42NO7P | 451.2699 | 452.2777 | 452.2770 | [M+H]+ | -1.6 | 13.52 | 9.02E+04 |
| LPE(17:0)                       | C22H46NO7P | 467.3012 | 468.3090 | 468.3087 | [M+H]+ | -0.6 | 18.38 | 8.75E+04 |
| LPE(18:0)                       | C23H48NO7P | 481.3168 | 482.3246 | 482.3241 | [M+H]+ | -1.1 | 21.19 | 8.33E+04 |
| LPE(18:1)                       | C23H46NO7P | 479.3012 | 480.3090 | 480.3085 | [M+H]+ | -1.1 | 22.52 | 2.38E+04 |
| LPE(18:2)                       | C23H44NO7P | 477.2855 | 478.2933 | 478.2930 | [M+H]+ | -0.7 | 14.17 | 1.12E+05 |
| LPE(20:0)                       | C25H52NO7P | 509.3481 | 510.3559 | 510.3551 | [M+H]+ | -1.7 | 16.93 | 1.82E+05 |
| LPE(20:1)                       | C25H50NO7P | 507.3325 | 508.3403 | 508.3401 | [M+H]+ | -0.4 | 20.21 | 3.52E+05 |
| LPE(20:2)                       | C25H48NO7P | 505.3168 | 506.3246 | 506.3242 | [M+H]+ | -0.8 | 17.74 | 7.86E+04 |
| LPE(20:3)                       | C25H46NO7P | 503.3012 | 504.3090 | 504.3081 | [M+H]+ | -1.8 | 15.21 | 1.38E+05 |
| LPE(20:5)                       | C25H42NO7P | 499.2699 | 500.2777 | 500.2775 | [M+H]+ | -0.4 | 12.34 | 1.83E+05 |
| LPE(22:6)                       | C27H44NO7P | 525.2855 | 526.2933 | 526.2925 | [M+H]+ | -1.5 | 13.37 | 6.25E+05 |
| LPG(16:0)                       | C22H45O9P  | 484.2801 | 483.2723 | 483.2741 | [M-H]- | 3.8  | 13.70 | 3.69E+04 |
| LPG(18:0)                       | C24H49O9P  | 512.3114 | 511.3036 | 511.3055 | [M-H]- | 3.7  | 15.93 | 3.57E+04 |
| LPG(18:1)                       | C24H47O9P  | 510.2958 | 509.2879 | 509.2890 | [M-H]- | 2.1  | 14.00 | 2.90E+05 |
| LPG(22:6)                       | C28H45O9P  | 556.2801 | 555.2723 | 555.2734 | [M-H]- | 1.9  | 11.82 | 3.23E+04 |
| LPI(16:0)                       | C25H49O12P | 572.2962 | 571.2883 | 571.2900 | [M-H]- | 2.9  | 13.56 | 1.41E+05 |
| LPI(18:0)                       | C27H53O12P | 600.3275 | 599.3196 | 599.3215 | [M-H]- | 3.2  | 15.65 | 5.73E+05 |
| LPI(18:1)                       | C27H51O12P | 598.3118 | 597.3040 | 597.3050 | [M-H]- | 1.7  | 13.92 | 2.56E+05 |
| LPI(20:2)                       | C29H53O12P | 624.3275 | 623.3196 | 623.3209 | [M-H]- | 2.0  | 14.23 | 2.87E+04 |
| LPI(20:3)                       | C29H51O12P | 622.3118 | 621.3040 | 621.3058 | [M-H]- | 2.9  | 13.10 | 5.53E+04 |
| LPI(20:4)                       | C29H49O12P | 620.2962 | 619.2883 | 619.2890 | [M-H]- | 1.1  | 12.32 | 1.80E+05 |
| LPI(22:4)                       | C31H53O12P | 648.3275 | 647.3196 | 647.3214 | [M-H]- | 2.7  | 13.53 | 3.14E+04 |
| LPI(22:6)                       | C31H49O12P | 644.2962 | 643.2883 | 643.2894 | [M-H]- | 1.7  | 11.90 | 2.14E+04 |
| LPS(18:1)                       | C24H46NO9P | 523.2910 | 524.2988 | 524.2985 | [M+H]+ | -0.5 | 13.13 | 1.23E+05 |
| LPS(18:2)                       | C24H44NO9P | 521.2754 | 522.2832 | 522.2832 | [M+H]+ | 0.1  | 11.39 | 1.22E+04 |
| LPS(20:0)                       | C26H52NO9P | 553.3380 | 554.3458 | 554.3452 | [M+H]+ | -1.0 | 20.00 | 2.39E+04 |

|           |            |          |          |          |          |      |       |          |
|-----------|------------|----------|----------|----------|----------|------|-------|----------|
| LPS(22:0) | C28H56NO9P | 581.3693 | 582.3771 | 582.3764 | [M+H]+   | -1.2 | 22.56 | 7.59E+04 |
| LPS(22:6) | C28H44NO9P | 569.2754 | 570.2832 | 570.2830 | [M+H]+   | -0.4 | 12.65 | 1.36E+04 |
| MG(20:4)  | C23H38O4   | 378.2770 | 396.3114 | 396.3096 | [M+NH4]+ | -4.4 | 17.56 | 1.26E+05 |
| PA(36:1)  | C39H75O8P  | 702.5199 | 701.5121 | 701.5135 | [M-H]-   | 2.0  | 30.11 | 4.29E+05 |
| PC(18:1)  | C26H50NO8P | 535.3274 | 536.3352 | 536.3353 | [M+H]+   | 0.1  | 21.01 | 2.87E+04 |
| PC(19:1)  | C27H52NO8P | 549.3430 | 550.3509 | 550.3493 | [M+H]+   | -2.9 | 15.85 | 2.31E+06 |
| PC(20:0)  | C28H56NO8P | 565.3743 | 566.3822 | 566.3808 | [M+H]+   | -2.3 | 17.19 | 3.13E+05 |
| PC(20:1)  | C28H54NO8P | 563.3587 | 564.3665 | 564.3655 | [M+H]+   | -1.7 | 21.59 | 1.04E+05 |
| PC(21:0)  | C29H58NO8P | 579.3900 | 580.3978 | 580.3953 | [M+H]+   | -4.3 | 19.18 | 3.80E+04 |
| PC(22:1)  | C30H58NO8P | 591.3900 | 592.3978 | 592.3977 | [M+H]+   | -0.2 | 21.34 | 1.18E+05 |
| PC(26:0)  | C34H68NO8P | 649.4682 | 650.4761 | 650.4743 | [M+H]+   | -2.7 | 25.32 | 2.30E+05 |
| PC(27:0)  | C35H70NO8P | 663.4839 | 664.4917 | 664.4906 | [M+H]+   | -1.7 | 27.24 | 2.68E+05 |
| PC(28:0)  | C36H72NO8P | 677.4995 | 678.5074 | 678.5057 | [M+H]+   | -2.4 | 27.50 | 6.99E+06 |
| PC(29:0)  | C37H74NO8P | 691.5152 | 692.5230 | 692.5218 | [M+H]+   | -1.7 | 30.13 | 2.49E+06 |
| PC(29:1)  | C37H72NO8P | 689.4995 | 690.5074 | 690.5053 | [M+H]+   | -2.9 | 34.29 | 9.72E+05 |
| PC(30:0)  | C38H76NO8P | 705.5308 | 706.5387 | 706.5372 | [M+H]+   | -2.1 | 31.99 | 3.90E+07 |
| PC(31:0)  | C39H78NO8P | 719.5465 | 720.5543 | 720.5527 | [M+H]+   | -2.2 | 34.48 | 3.38E+06 |
| PC(31:1)  | C39H76NO8P | 717.5308 | 718.5387 | 718.5368 | [M+H]+   | -2.5 | 38.84 | 9.53E+06 |
| PC(31:2)  | C39H74NO8P | 715.5152 | 716.5230 | 716.5213 | [M+H]+   | -2.4 | 35.03 | 8.81E+05 |
| PC(32:0)  | C40H80NO8P | 733.5621 | 734.5700 | 734.5684 | [M+H]+   | -2.2 | 36.08 | 1.25E+07 |
| PC(32:1)  | C40H78NO8P | 731.5465 | 732.5543 | 732.5519 | [M+H]+   | -3.2 | 30.09 | 9.42E+07 |
| PC(32:2)  | C40H76NO8P | 729.5308 | 730.5387 | 730.5368 | [M+H]+   | -2.6 | 29.86 | 2.35E+07 |
| PC(32:3)  | C40H74NO8P | 727.5152 | 728.5230 | 728.5210 | [M+H]+   | -2.8 | 26.10 | 1.85E+05 |
| PC(33:0)  | C41H82NO8P | 747.5778 | 748.5856 | 748.5851 | [M+H]+   | -0.6 | 38.70 | 1.48E+06 |
| PC(33:1)  | C41H80NO8P | 745.5621 | 746.5700 | 746.5693 | [M+H]+   | -0.8 | 35.10 | 1.58E+07 |
| PC(33:2)  | C41H78NO8P | 743.5465 | 744.5543 | 744.5526 | [M+H]+   | -2.2 | 39.54 | 1.26E+07 |
| PC(33:3)  | C41H76NO8P | 741.5308 | 742.5387 | 742.5371 | [M+H]+   | -2.1 | 28.19 | 2.17E+05 |
| PC(34:0)  | C42H84NO8P | 761.5934 | 762.6012 | 762.5993 | [M+H]+   | -2.6 | 45.21 | 9.70E+06 |
| PC(34:1)  | C42H82NO8P | 759.5778 | 760.5856 | 760.5820 | [M+H]+   | -4.7 | 33.39 | 1.54E+08 |
| PC(34:2)  | C42H80NO8P | 757.5621 | 758.5700 | 758.5676 | [M+H]+   | -3.2 | 33.74 | 8.80E+07 |
| PC(34:3)  | C42H78NO8P | 755.5465 | 756.5543 | 756.5524 | [M+H]+   | -2.5 | 30.51 | 1.50E+07 |
| PC(34:4)  | C42H76NO8P | 753.5308 | 754.5387 | 754.5355 | [M+H]+   | -4.2 | 28.83 | 1.92E+06 |
| PC(34:5)  | C42H74NO8P | 751.5152 | 752.5230 | 752.5219 | [M+H]+   | -1.4 | 26.82 | 3.20E+05 |
| PC(35:1)  | C43H84NO8P | 773.5934 | 774.6012 | 774.5984 | [M+H]+   | -3.6 | 40.50 | 1.47E+07 |

|           |            |          |          |          |        |      |       |          |
|-----------|------------|----------|----------|----------|--------|------|-------|----------|
| PC(35:2)  | C43H82NO8P | 771.5778 | 772.5856 | 772.5823 | [M+H]+ | -4.2 | 34.94 | 8.46E+06 |
| PC(35:5)  | C43H76NO8P | 765.5308 | 766.5387 | 766.5367 | [M+H]+ | -2.6 | 35.29 | 5.01E+06 |
| PC(36:1)  | C44H86NO8P | 787.6091 | 788.6169 | 788.6140 | [M+H]+ | -3.7 | 42.60 | 7.01E+07 |
| PC(36:2)  | C44H84NO8P | 785.5934 | 786.6012 | 786.5978 | [M+H]+ | -4.4 | 36.28 | 5.88E+07 |
| PC(36:3)  | C44H82NO8P | 783.5778 | 784.5856 | 784.5818 | [M+H]+ | -4.8 | 33.92 | 3.04E+07 |
| PC(36:4)  | C44H80NO8P | 781.5621 | 782.5700 | 782.5678 | [M+H]+ | -2.8 | 31.66 | 1.45E+07 |
| PC(36:5)  | C44H78NO8P | 779.5465 | 780.5543 | 780.5516 | [M+H]+ | -3.4 | 29.59 | 9.47E+06 |
| PC(36:6)  | C44H76NO8P | 777.5308 | 778.5387 | 778.5359 | [M+H]+ | -3.5 | 28.57 | 4.40E+06 |
| PC(37:1)  | C45H88NO8P | 801.6247 | 802.6325 | 802.6316 | [M+H]+ | -1.1 | 54.32 | 1.29E+06 |
| PC(37:2)  | C45H86NO8P | 799.6091 | 800.6169 | 800.6126 | [M+H]+ | -5.3 | 39.58 | 5.91E+06 |
| PC(37:5)  | C45H80NO8P | 793.5621 | 794.5700 | 794.5678 | [M+H]+ | -2.7 | 31.40 | 1.26E+06 |
| PC(37:6)  | C45H78NO8P | 791.5465 | 792.5543 | 792.5521 | [M+H]+ | -2.8 | 29.65 | 7.38E+05 |
| PC(38:1)  | C46H90NO8P | 815.6404 | 816.6482 | 816.6464 | [M+H]+ | -2.2 | 51.22 | 3.23E+06 |
| PC(38:2)  | C46H88NO8P | 813.6247 | 814.6325 | 814.6287 | [M+H]+ | -4.7 | 43.33 | 2.94E+07 |
| PC(38:3)  | C46H86NO8P | 811.6091 | 812.6169 | 812.6128 | [M+H]+ | -5.1 | 39.13 | 8.81E+06 |
| PC(38:4)  | C46H84NO8P | 809.5934 | 810.6012 | 810.5968 | [M+H]+ | -5.5 | 38.65 | 9.50E+06 |
| PC(38:5)  | C46H82NO8P | 807.5778 | 808.5856 | 808.5820 | [M+H]+ | -4.4 | 33.34 | 1.96E+07 |
| PC(38:6)  | C46H80NO8P | 805.5621 | 806.5700 | 806.5662 | [M+H]+ | -4.7 | 32.55 | 1.57E+07 |
| PC(38:7)  | C46H78NO8P | 803.5465 | 804.5543 | 804.5521 | [M+H]+ | -2.8 | 29.08 | 4.09E+06 |
| PC(38:8)  | C46H76NO8P | 801.5308 | 802.5387 | 802.5370 | [M+H]+ | -2.1 | 27.86 | 1.21E+05 |
| PC(39:1)  | C47H92NO8P | 829.6560 | 830.6638 | 830.6625 | [M+H]+ | -1.6 | 56.07 | 3.71E+06 |
| PC(39:2)  | C47H90NO8P | 827.6404 | 828.6482 | 828.6473 | [M+H]+ | -1.1 | 53.33 | 1.03E+06 |
| PC(39:3)  | C47H88NO8P | 825.6247 | 826.6325 | 826.6284 | [M+H]+ | -5.0 | 41.94 | 3.66E+05 |
| PC(40:0)  | C48H96NO8P | 845.6873 | 846.6951 | 846.6930 | [M+H]+ | -2.6 | 59.62 | 5.61E+05 |
| PC(40:1)  | C48H94NO8P | 843.6717 | 844.6795 | 844.6748 | [M+H]+ | -5.5 | 54.34 | 2.44E+06 |
| PC(40:10) | C48H76NO8P | 825.5308 | 826.5387 | 826.5445 | [M+H]+ | 7.1  | 24.86 | 1.95E+05 |
| PC(40:2)  | C48H92NO8P | 841.6560 | 842.6638 | 842.6606 | [M+H]+ | -3.9 | 49.33 | 6.70E+06 |
| PC(40:3)  | C48H90NO8P | 839.6404 | 840.6482 | 840.6447 | [M+H]+ | -4.1 | 44.40 | 1.77E+06 |
| PC(40:4)  | C48H88NO8P | 837.6247 | 838.6325 | 838.6292 | [M+H]+ | -4.0 | 39.77 | 2.12E+06 |
| PC(40:5)  | C48H86NO8P | 835.6091 | 836.6169 | 836.6125 | [M+H]+ | -5.3 | 38.62 | 5.27E+06 |
| PC(40:6)  | C48H84NO8P | 833.5934 | 834.6012 | 834.5975 | [M+H]+ | -4.5 | 34.61 | 5.89E+06 |
| PC(40:7)  | C48H82NO8P | 831.5778 | 832.5856 | 832.5816 | [M+H]+ | -4.9 | 32.96 | 1.22E+07 |
| PC(40:8)  | C48H80NO8P | 829.5621 | 830.5700 | 830.5680 | [M+H]+ | -2.4 | 29.64 | 2.48E+06 |
| PC(40:9)  | C48H78NO8P | 827.5465 | 828.5543 | 828.5519 | [M+H]+ | -2.9 | 28.13 | 7.62E+05 |

|                          |             |          |          |          |                    |      |       |          |
|--------------------------|-------------|----------|----------|----------|--------------------|------|-------|----------|
| PC(41:4)                 | C49H90NO8P  | 851.6404 | 852.6482 | 852.6462 | [M+H] <sup>+</sup> | -2.3 | 55.63 | 5.05E+05 |
| PC(42:0)                 | C50H100NO8P | 873.7186 | 874.7264 | 874.7238 | [M+H] <sup>+</sup> | -3.0 | 62.82 | 4.16E+05 |
| PC(42:1)                 | C50H98NO8P  | 871.7030 | 872.7108 | 872.7087 | [M+H] <sup>+</sup> | -2.5 | 56.39 | 3.93E+06 |
| PC(42:10)                | C50H80NO8P  | 853.5621 | 854.5700 | 854.5705 | [M+H] <sup>+</sup> | 0.7  | 28.56 | 3.73E+06 |
| PC(42:11)                | C50H78NO8P  | 851.5465 | 852.5543 | 852.5578 | [M+H] <sup>+</sup> | 4.1  | 26.46 | 6.87E+05 |
| PC(42:2)                 | C50H96NO8P  | 869.6873 | 870.6951 | 870.6921 | [M+H] <sup>+</sup> | -3.4 | 53.92 | 3.88E+06 |
| PC(42:3)                 | C50H94NO8P  | 867.6717 | 868.6795 | 868.6765 | [M+H] <sup>+</sup> | -3.4 | 44.86 | 7.50E+05 |
| PC(42:5)                 | C50H90NO8P  | 863.6404 | 864.6482 | 864.6447 | [M+H] <sup>+</sup> | -4.0 | 41.40 | 5.58E+05 |
| PC(42:6)                 | C50H88NO8P  | 861.6247 | 862.6325 | 862.6281 | [M+H] <sup>+</sup> | -5.1 | 39.08 | 8.85E+05 |
| PC(42:7)                 | C50H86NO8P  | 859.6091 | 860.6169 | 860.6131 | [M+H] <sup>+</sup> | -4.4 | 36.62 | 4.65E+05 |
| PC(42:8)                 | C50H84NO8P  | 857.5934 | 858.6012 | 858.5981 | [M+H] <sup>+</sup> | -3.7 | 32.31 | 7.35E+05 |
| PC(42:9)                 | C50H82NO8P  | 855.5778 | 856.5856 | 856.5834 | [M+H] <sup>+</sup> | -2.5 | 30.41 | 2.14E+06 |
| PC(43:2)                 | C51H98NO8P  | 883.7030 | 884.7108 | 884.7091 | [M+H] <sup>+</sup> | -1.9 | 56.34 | 2.44E+05 |
| PC(43:6)                 | C51H90NO8P  | 875.6404 | 876.6482 | 876.6459 | [M+H] <sup>+</sup> | -2.6 | 52.03 | 3.15E+05 |
| PC(44:1)                 | C52H102NO8P | 899.7343 | 900.7421 | 900.7396 | [M+H] <sup>+</sup> | -2.7 | 59.28 | 1.98E+06 |
| PC(44:10)                | C52H84NO8P  | 881.5934 | 882.6012 | 882.6042 | [M+H] <sup>+</sup> | 3.3  | 32.89 | 6.54E+05 |
| PC(44:12)                | C52H80NO8P  | 877.5621 | 878.5700 | 878.5728 | [M+H] <sup>+</sup> | 3.2  | 28.34 | 1.32E+06 |
| PC(44:2)                 | C52H100NO8P | 897.7186 | 898.7264 | 898.7247 | [M+H] <sup>+</sup> | -2.0 | 57.22 | 1.91E+06 |
| PC(44:3)                 | C52H98NO8P  | 895.7030 | 896.7108 | 896.7073 | [M+H] <sup>+</sup> | -3.8 | 54.00 | 9.12E+05 |
| PC(44:4)                 | C52H96NO8P  | 893.6873 | 894.6951 | 894.6928 | [M+H] <sup>+</sup> | -2.6 | 51.97 | 3.82E+05 |
| PC(44:5)                 | C52H94NO8P  | 891.6717 | 892.6795 | 892.6764 | [M+H] <sup>+</sup> | -3.4 | 49.59 | 3.06E+05 |
| PC(46:0)                 | C54H108NO8P | 929.7812 | 930.7890 | 930.7860 | [M+H] <sup>+</sup> | -3.3 | 59.36 | 1.42E+06 |
| PC(46:2)                 | C54H104NO8P | 925.7499 | 926.7577 | 926.7547 | [M+H] <sup>+</sup> | -3.3 | 59.23 | 2.84E+05 |
| PC(48:2)                 | C56H108NO8P | 953.7812 | 954.7890 | 954.7884 | [M+H] <sup>+</sup> | -0.7 | 64.08 | 2.14E+05 |
| PC(O-12:0/O-12:0)        | C32H68NO6P  | 593.4784 | 594.4862 | 594.4844 | [M+H] <sup>+</sup> | -3.1 | 32.22 | 1.28E+06 |
| PC(O-28:0)               | C36H74NO7P  | 663.5203 | 664.5281 | 664.5261 | [M+H] <sup>+</sup> | -3.0 | 31.36 | 2.51E+06 |
| PC(O-30:0)               | C38H78NO7P  | 691.5516 | 692.5594 | 692.5572 | [M+H] <sup>+</sup> | -3.2 | 36.20 | 1.02E+07 |
| PC(O-30:1) or PC(P-30:0) | C38H76NO7P  | 689.5359 | 690.5437 | 690.5424 | [M+H] <sup>+</sup> | -2.0 | 31.23 | 3.75E+06 |
| PC(O-31:0)               | C39H80NO7P  | 705.5672 | 706.5750 | 706.5725 | [M+H] <sup>+</sup> | -3.6 | 38.36 | 3.07E+06 |
| PC(O-31:1) or PC(P-31:0) | C39H78NO7P  | 703.5516 | 704.5594 | 704.5578 | [M+H] <sup>+</sup> | -2.2 | 48.25 | 6.99E+05 |
| PC(O-32:0)               | C40H82NO7P  | 719.5829 | 720.5907 | 720.5885 | [M+H] <sup>+</sup> | -3.0 | 41.56 | 1.02E+08 |
| PC(O-32:1) or PC(P-32:0) | C40H80NO7P  | 717.5672 | 718.5750 | 718.5724 | [M+H] <sup>+</sup> | -3.7 | 32.77 | 6.73E+06 |
| PC(O-32:2) or PC(P-32:1) | C40H78NO7P  | 715.5516 | 716.5594 | 716.5577 | [M+H] <sup>+</sup> | -2.4 | 31.31 | 2.50E+06 |
| PC(O-34:0)               | C42H86NO7P  | 747.6142 | 748.6220 | 748.6200 | [M+H] <sup>+</sup> | -2.6 | 50.02 | 3.26E+07 |

|                          |             |          |          |          |                    |      |       |          |
|--------------------------|-------------|----------|----------|----------|--------------------|------|-------|----------|
| PC(O-34:4) or PC(P-34:3) | C42H78NO7P  | 739.5516 | 740.5594 | 740.5572 | [M+H] <sup>+</sup> | -2.9 | 30.57 | 3.83E+05 |
| PC(O-35:0)               | C43H88NO7P  | 761.6298 | 762.6376 | 762.6365 | [M+H] <sup>+</sup> | -1.6 | 52.49 | 4.73E+05 |
| PC(O-35:2)               | C43H84NO7P  | 757.5985 | 758.6063 | 758.6042 | [M+H] <sup>+</sup> | -2.9 | 53.18 | 3.47E+06 |
| PC(O-36:0)               | C44H90NO7P  | 775.6455 | 776.6533 | 776.6523 | [M+H] <sup>+</sup> | -1.3 | 53.90 | 6.81E+06 |
| PC(O-36:1) or PC(P-36:0) | C44H88NO7P  | 773.6298 | 774.6376 | 774.6341 | [M+H] <sup>+</sup> | -4.6 | 47.65 | 3.64E+07 |
| PC(O-36:2) or PC(P-36:1) | C44H86NO7P  | 771.6142 | 772.6220 | 772.6188 | [M+H] <sup>+</sup> | -4.1 | 42.05 | 3.61E+07 |
| PC(O-36:3) or PC(P-36:2) | C44H84NO7P  | 769.5985 | 770.6063 | 770.6027 | [M+H] <sup>+</sup> | -4.7 | 41.12 | 1.50E+07 |
| PC(O-36:4) or PC(P-36:3) | C44H82NO7P  | 767.5829 | 768.5907 | 768.5871 | [M+H] <sup>+</sup> | -4.7 | 36.55 | 3.29E+07 |
| PC(O-36:5) or PC(P-36:4) | C44H80NO7P  | 765.5672 | 766.5750 | 766.5720 | [M+H] <sup>+</sup> | -3.9 | 33.27 | 7.80E+06 |
| PC(O-37:4)               | C45H84NO7P  | 781.5985 | 782.6063 | 782.6027 | [M+H] <sup>+</sup> | -4.6 | 39.38 | 1.63E+06 |
| PC(O-38:1) or PC(P-38:0) | C46H92NO7P  | 801.6611 | 802.6689 | 802.6668 | [M+H] <sup>+</sup> | -2.6 | 53.29 | 1.70E+07 |
| PC(O-38:2) or PC(P-38:1) | C46H90NO7P  | 799.6455 | 800.6533 | 800.6498 | [M+H] <sup>+</sup> | -4.4 | 47.79 | 9.82E+06 |
| PC(O-38:3) or PC(P-38:2) | C46H88NO7P  | 797.6298 | 798.6376 | 798.6338 | [M+H] <sup>+</sup> | -4.8 | 45.07 | 4.49E+06 |
| PC(O-38:4) or PC(P-38:3) | C46H86NO7P  | 795.6142 | 796.6220 | 796.6184 | [M+H] <sup>+</sup> | -4.5 | 42.65 | 1.85E+07 |
| PC(O-38:5) or PC(P-38:4) | C46H84NO7P  | 793.5985 | 794.6063 | 794.6025 | [M+H] <sup>+</sup> | -4.9 | 36.47 | 2.77E+07 |
| PC(O-38:6) or PC(P-38:5) | C46H82NO7P  | 791.5829 | 792.5907 | 792.5870 | [M+H] <sup>+</sup> | -4.7 | 33.88 | 1.32E+07 |
| PC(O-40:0)               | C46H94NO7P  | 803.6768 | 804.6846 | 804.6829 | [M+H] <sup>+</sup> | -2.1 | 58.83 | 3.95E+06 |
| PC(O-40:1) or PC(P-40:0) | C48H96NO7P  | 829.6924 | 830.7002 | 830.6968 | [M+H] <sup>+</sup> | -4.1 | 55.06 | 9.05E+06 |
| PC(O-40:2) or PC(P-40:1) | C48H94NO7P  | 827.6768 | 828.6846 | 828.6808 | [M+H] <sup>+</sup> | -4.6 | 48.19 | 7.74E+06 |
| PC(O-40:3) or PC(P-40:2) | C48H92NO7P  | 825.6611 | 826.6689 | 826.6657 | [M+H] <sup>+</sup> | -3.9 | 49.18 | 2.40E+06 |
| PC(O-40:4) or PC(P-40:3) | C48H90NO7P  | 823.6455 | 824.6533 | 824.6495 | [M+H] <sup>+</sup> | -4.6 | 46.59 | 4.95E+06 |
| PC(O-40:5) or PC(P-40:4) | C48H88NO7P  | 821.6298 | 822.6376 | 822.6336 | [M+H] <sup>+</sup> | -5.0 | 43.12 | 1.25E+07 |
| PC(O-40:6) or PC(P-40:5) | C48H86NO7P  | 819.6142 | 820.6220 | 820.6178 | [M+H] <sup>+</sup> | -5.1 | 40.86 | 1.32E+07 |
| PC(O-42:1) or PC(P-42:0) | C50H100NO7P | 857.7237 | 858.7315 | 858.7288 | [M+H] <sup>+</sup> | -3.2 | 59.26 | 8.37E+06 |
| PC(O-42:2) or PC(P-42:1) | C50H98NO7P  | 855.7081 | 856.7159 | 856.7131 | [M+H] <sup>+</sup> | -3.3 | 56.16 | 1.60E+07 |
| PC(O-42:4)               | C50H94NO7P  | 851.6768 | 852.6846 | 852.6815 | [M+H] <sup>+</sup> | -3.6 | 49.68 | 3.48E+06 |
| PC(O-42:6)               | C50H90NO7P  | 847.6455 | 848.6533 | 848.6495 | [M+H] <sup>+</sup> | -4.5 | 47.84 | 2.75E+06 |
| PC(P-36:5)               | C44H78NO7P  | 763.5516 | 764.5594 | 764.5563 | [M+H] <sup>+</sup> | -4.0 | 33.28 | 3.07E+06 |
| PC(P-38:6)               | C46H80NO7P  | 789.5672 | 790.5750 | 790.5702 | [M+H] <sup>+</sup> | -6.1 | 31.86 | 3.24E+06 |
| PC(P-39:1)               | C47H92NO7P  | 813.6611 | 814.6689 | 814.6690 | [M+H] <sup>+</sup> | 0.1  | 58.99 | 7.17E+05 |
| PC(P-40:6)               | C48H84NO7P  | 817.5985 | 818.6063 | 818.6031 | [M+H] <sup>+</sup> | -4.0 | 35.53 | 9.38E+06 |
| PC(P-42:2)               | C50H96NO7P  | 853.6924 | 854.7002 | 854.6969 | [M+H] <sup>+</sup> | -3.9 | 53.34 | 4.06E+06 |
| PC(P-42:4)               | C50H92NO7P  | 849.6611 | 850.6689 | 850.6654 | [M+H] <sup>+</sup> | -4.2 | 44.61 | 3.19E+06 |
| PC(P-42:6)               | C50H88NO7P  | 845.6298 | 846.6376 | 846.6338 | [M+H] <sup>+</sup> | -4.5 | 39.82 | 8.46E+05 |

|          |            |          |          |          |        |      |       |          |
|----------|------------|----------|----------|----------|--------|------|-------|----------|
| PE(24:0) | C29H58NO8P | 579.3900 | 580.3978 | 580.3953 | [M+H]+ | -4.3 | 19.18 | 3.80E+04 |
| PE(26:0) | C31H62NO8P | 607.4213 | 608.4291 | 608.4289 | [M+H]+ | -0.4 | 20.02 | 2.09E+04 |
| PE(32:1) | C37H72NO8P | 689.4995 | 690.5074 | 690.5053 | [M+H]+ | -2.9 | 34.29 | 9.72E+05 |
| PE(34:1) | C39H76NO8P | 717.5308 | 718.5387 | 718.5368 | [M+H]+ | -2.5 | 38.84 | 9.53E+06 |
| PE(34:2) | C39H74NO8P | 715.5152 | 716.5230 | 716.5213 | [M+H]+ | -2.4 | 35.03 | 8.81E+05 |
| PE(35:0) | C40H80NO8P | 733.5621 | 734.5700 | 734.5685 | [M+H]+ | -2.0 | 43.21 | 8.35E+05 |
| PE(35:1) | C40H78NO8P | 731.5465 | 732.5543 | 732.5526 | [M+H]+ | -2.4 | 37.14 | 8.87E+05 |
| PE(35:2) | C40H76NO8P | 729.5308 | 730.5387 | 730.5368 | [M+H]+ | -2.6 | 26.75 | 2.89E+05 |
| PE(35:3) | C40H74NO8P | 727.5152 | 728.5230 | 728.5210 | [M+H]+ | -2.8 | 26.11 | 1.85E+05 |
| PE(36:0) | C41H82NO8P | 747.5778 | 748.5856 | 748.5851 | [M+H]+ | -0.6 | 38.71 | 1.48E+06 |
| PE(36:1) | C41H80NO8P | 745.5621 | 746.5700 | 746.5693 | [M+H]+ | -0.8 | 35.11 | 1.58E+07 |
| PE(36:2) | C41H78NO8P | 743.5465 | 744.5543 | 744.5526 | [M+H]+ | -2.2 | 39.54 | 1.26E+07 |
| PE(36:3) | C41H76NO8P | 741.5308 | 742.5387 | 742.5371 | [M+H]+ | -2.1 | 28.19 | 2.17E+05 |
| PE(37:1) | C42H82NO8P | 759.5778 | 760.5856 | 760.5843 | [M+H]+ | -1.6 | 53.71 | 1.56E+06 |
| PE(37:2) | C42H80NO8P | 757.5621 | 758.5700 | 758.5687 | [M+H]+ | -1.6 | 25.94 | 4.17E+05 |
| PE(38:4) | C43H78NO8P | 767.5465 | 768.5543 | 768.5502 | [M+H]+ | -5.3 | 37.60 | 1.76E+06 |
| PE(38:5) | C43H76NO8P | 765.5308 | 766.5387 | 766.5367 | [M+H]+ | -2.6 | 35.29 | 5.01E+06 |
| PE(39:2) | C44H84NO8P | 785.5934 | 786.6012 | 786.5982 | [M+H]+ | -3.9 | 48.86 | 6.92E+05 |
| PE(39:5) | C44H78NO8P | 779.5465 | 780.5543 | 780.5507 | [M+H]+ | -4.6 | 24.42 | 3.34E+04 |
| PE(40:1) | C45H88NO8P | 801.6247 | 802.6325 | 802.6316 | [M+H]+ | -1.1 | 54.32 | 1.29E+06 |
| PE(40:2) | C45H86NO8P | 799.6091 | 800.6169 | 800.6152 | [M+H]+ | -2.1 | 49.88 | 1.15E+06 |
| PE(40:4) | C45H82NO8P | 795.5778 | 796.5856 | 796.5820 | [M+H]+ | -4.6 | 43.70 | 5.51E+05 |
| PE(40:5) | C45H80NO8P | 793.5621 | 794.5700 | 794.5678 | [M+H]+ | -2.7 | 31.40 | 1.26E+06 |
| PE(40:6) | C45H78NO8P | 791.5465 | 792.5543 | 792.5511 | [M+H]+ | -4.0 | 35.94 | 9.96E+05 |
| PE(41:1) | C46H90NO8P | 815.6404 | 816.6482 | 816.6466 | [M+H]+ | -1.9 | 55.47 | 2.36E+05 |
| PE(41:4) | C46H84NO8P | 809.5934 | 810.6012 | 810.5996 | [M+H]+ | -2.0 | 26.00 | 1.95E+05 |
| PE(42:1) | C47H92NO8P | 829.6560 | 830.6638 | 830.6625 | [M+H]+ | -1.6 | 56.07 | 3.71E+06 |
| PE(42:2) | C47H90NO8P | 827.6404 | 828.6482 | 828.6473 | [M+H]+ | -1.1 | 53.33 | 1.03E+06 |
| PE(43:0) | C48H96NO8P | 845.6873 | 846.6951 | 846.6930 | [M+H]+ | -2.6 | 59.63 | 5.61E+05 |
| PE(44:4) | C49H90NO8P | 851.6404 | 852.6482 | 852.6462 | [M+H]+ | -2.3 | 55.63 | 5.05E+05 |
| PG(32:0) | C38H75O10P | 722.5098 | 721.5019 | 721.5035 | [M-H]- | 2.2  | 27.31 | 1.63E+05 |
| PG(32:1) | C38H73O10P | 720.4941 | 719.4863 | 719.4880 | [M-H]- | 2.3  | 26.62 | 8.07E+04 |
| PG(34:1) | C40H77O10P | 748.5254 | 747.5176 | 747.5108 | [M-H]- | -9.1 | 29.75 | 1.41E+05 |
| PG(34:2) | C40H75O10P | 746.5098 | 745.5019 | 745.5047 | [M-H]- | 3.7  | 24.64 | 8.99E+05 |



|           |            |          |          |          |        |      |       |          |
|-----------|------------|----------|----------|----------|--------|------|-------|----------|
| PG(34:3)  | C40H73O10P | 744.4941 | 743.4863 | 743.4890 | [M-H]- | 3.6  | 24.65 | 5.80E+04 |
| PG(36:0)  | C42H83O10P | 778.5724 | 777.5645 | 777.5587 | [M-H]- | -7.5 | 35.04 | 5.37E+05 |
| PG(36:1)  | C42H81O10P | 776.5567 | 775.5489 | 775.5505 | [M-H]- | 2.1  | 31.85 | 5.24E+04 |
| PG(36:2)  | C42H79O10P | 774.5411 | 773.5332 | 773.5339 | [M-H]- | 0.9  | 29.18 | 1.53E+05 |
| PG(36:3)  | C42H77O10P | 772.5254 | 771.5176 | 771.5185 | [M-H]- | 1.1  | 27.07 | 5.33E+05 |
| PG(36:4)  | C42H75O10P | 770.5098 | 769.5019 | 769.5037 | [M-H]- | 2.3  | 25.33 | 5.65E+05 |
| PG(36:5)  | C42H73O10P | 768.4941 | 767.4863 | 767.4902 | [M-H]- | 5.1  | 24.54 | 4.38E+04 |
| PG(36:6)  | C42H71O10P | 766.4785 | 765.4706 | 765.4731 | [M-H]- | 3.2  | 23.10 | 4.66E+05 |
| PG(38:5)  | C44H77O10P | 796.5254 | 795.5176 | 795.5182 | [M-H]- | 0.7  | 26.40 | 5.57E+05 |
| PG(38:6)  | C44H75O10P | 794.5098 | 793.5019 | 793.5038 | [M-H]- | 2.4  | 24.56 | 2.74E+05 |
| PG(38:7)  | C44H73O10P | 792.4941 | 791.4863 | 791.4882 | [M-H]- | 2.4  | 22.65 | 2.81E+05 |
| PG(40:5)  | C46H81O10P | 824.5567 | 823.5489 | 823.5411 | [M-H]- | -9.4 | 28.40 | 1.88E+05 |
| PG(40:6)  | C46H79O10P | 822.5411 | 821.5332 | 821.5350 | [M-H]- | 2.1  | 25.31 | 3.70E+05 |
| PG(40:7)  | C46H77O10P | 820.5254 | 819.5176 | 819.5190 | [M-H]- | 1.7  | 25.01 | 2.01E+05 |
| PG(40:8)  | C46H75O10P | 818.5098 | 817.5019 | 817.5050 | [M-H]- | 3.8  | 24.00 | 8.51E+04 |
| PG(40:9)  | C46H73O10P | 816.4941 | 815.4863 | 815.4874 | [M-H]- | 1.3  | 22.83 | 9.59E+04 |
| PG(42:8)  | C48H79O10P | 846.5411 | 845.5332 | 845.5372 | [M-H]- | 4.7  | 24.89 | 1.85E+05 |
| PG(42:9)  | C48H77O10P | 844.5254 | 843.5176 | 843.5204 | [M-H]- | 3.4  | 24.47 | 2.50E+05 |
| PG(44:12) | C50H75O10P | 866.5098 | 865.5019 | 865.5030 | [M-H]- | 1.2  | 24.37 | 2.81E+04 |
| PI(32:0)  | C41H79O13P | 810.5258 | 809.5180 | 809.5196 | [M-H]- | 2.0  | 27.14 | 5.02E+04 |
| PI(32:1)  | C41H77O13P | 808.5102 | 807.5023 | 807.5041 | [M-H]- | 2.3  | 26.54 | 1.27E+06 |
| PI(34:0)  | C43H83O13P | 838.5571 | 837.5493 | 837.5573 | [M-H]- | 9.6  | 27.58 | 1.80E+05 |
| PI(34:1)  | C43H81O13P | 836.5415 | 835.5336 | 835.5339 | [M-H]- | 0.3  | 26.72 | 2.32E+06 |
| PI(34:2)  | C43H79O13P | 834.5258 | 833.5180 | 833.5193 | [M-H]- | 1.5  | 26.82 | 2.40E+06 |
| PI(34:3)  | C43H77O13P | 832.5102 | 831.5023 | 831.5041 | [M-H]- | 2.1  | 25.56 | 8.98E+04 |
| PI(35:1)  | C44H83O13P | 850.5571 | 849.5493 | 849.5522 | [M-H]- | 3.5  | 27.76 | 2.67E+04 |
| PI(35:2)  | C44H81O13P | 848.5415 | 847.5336 | 847.5345 | [M-H]- | 1.0  | 27.14 | 6.39E+04 |
| PI(36:0)  | C45H87O13P | 866.5884 | 865.5806 | 865.5851 | [M-H]- | 5.2  | 29.05 | 4.89E+04 |
| PI(36:1)  | C45H85O13P | 864.5728 | 863.5649 | 863.5661 | [M-H]- | 1.3  | 33.34 | 9.98E+05 |
| PI(36:2)  | C45H83O13P | 862.5571 | 861.5493 | 861.5496 | [M-H]- | 0.3  | 28.14 | 2.62E+06 |
| PI(36:3)  | C45H81O13P | 860.5415 | 859.5336 | 859.5337 | [M-H]- | 0.1  | 28.28 | 1.95E+06 |
| PI(36:4)  | C45H79O13P | 858.5258 | 857.5180 | 857.5227 | [M-H]- | 5.6  | 24.60 | 2.27E+04 |
| PI(36:5)  | C45H77O13P | 856.5102 | 855.5023 | 855.5042 | [M-H]- | 2.2  | 24.57 | 2.93E+05 |
| PI(37:2)  | C46H85O13P | 876.5728 | 875.5649 | 875.5658 | [M-H]- | 1.0  | 31.06 | 1.07E+05 |

|          |             |          |          |          |        |      |       |          |
|----------|-------------|----------|----------|----------|--------|------|-------|----------|
| PI(37:3) | C46H83O13P  | 874.5571 | 873.5493 | 873.5522 | [M-H]- | 3.3  | 28.29 | 9.41E+04 |
| PI(37:4) | C46H81O13P  | 872.5415 | 871.5336 | 871.5346 | [M-H]- | 1.1  | 27.89 | 3.52E+05 |
| PI(38:0) | C47H91O13P  | 894.6197 | 893.6119 | 893.6144 | [M-H]- | 2.9  | 30.92 | 1.06E+05 |
| PI(38:1) | C47H89O13P  | 892.6041 | 891.5962 | 891.5976 | [M-H]- | 1.5  | 32.38 | 7.11E+04 |
| PI(38:2) | C47H87O13P  | 890.5884 | 889.5806 | 889.5814 | [M-H]- | 1.0  | 35.32 | 7.23E+05 |
| PI(38:3) | C47H85O13P  | 888.5728 | 887.5649 | 887.5725 | [M-H]- | 8.5  | 29.55 | 2.31E+06 |
| PI(38:4) | C47H83O13P  | 886.5571 | 885.5493 | 885.5525 | [M-H]- | 3.6  | 27.44 | 1.18E+07 |
| PI(38:5) | C47H81O13P  | 884.5415 | 883.5336 | 883.5425 | [M-H]- | 10.0 | 24.85 | 5.80E+04 |
| PI(38:6) | C47H79O13P  | 882.5258 | 881.5180 | 881.5184 | [M-H]- | 0.5  | 26.38 | 9.36E+05 |
| PI(39:3) | C48H87O13P  | 902.5884 | 901.5806 | 901.5824 | [M-H]- | 2.1  | 30.34 | 5.48E+04 |
| PI(39:4) | C48H85O13P  | 900.5728 | 899.5649 | 899.5670 | [M-H]- | 2.3  | 30.36 | 7.46E+04 |
| PI(39:5) | C48H83O13P  | 898.5571 | 897.5493 | 897.5507 | [M-H]- | 1.6  | 27.67 | 8.27E+04 |
| PI(40:2) | C49H91O13P  | 918.6197 | 917.6119 | 917.6121 | [M-H]- | 0.3  | 38.07 | 4.12E+04 |
| PI(40:4) | C49H87O13P  | 914.5884 | 913.5806 | 913.5819 | [M-H]- | 1.5  | 30.57 | 9.82E+05 |
| PI(40:5) | C49H85O13P  | 912.5728 | 911.5649 | 911.5665 | [M-H]- | 1.7  | 27.86 | 9.86E+05 |
| PI(40:6) | C49H83O13P  | 910.5571 | 909.5493 | 909.5504 | [M-H]- | 1.2  | 28.68 | 7.23E+05 |
| PI(40:7) | C49H81O13P  | 908.5415 | 907.5336 | 907.5338 | [M-H]- | 0.2  | 26.07 | 1.45E+05 |
| PI(40:8) | C49H79O13P  | 906.5258 | 905.5180 | 905.5188 | [M-H]- | 0.9  | 25.15 | 5.38E+04 |
| PS(27:0) | C33H64NO10P | 665.4268 | 666.4346 | 666.4335 | [M+H]+ | -1.6 | 14.63 | 1.14E+05 |
| PS(27:1) | C33H62NO10P | 663.4111 | 664.4189 | 664.4183 | [M+H]+ | -0.9 | 18.27 | 2.15E+04 |
| PS(29:0) | C35H68NO10P | 693.4581 | 694.4659 | 694.4643 | [M+H]+ | -2.3 | 18.91 | 1.25E+05 |
| PS(30:2) | C36H66NO10P | 703.4424 | 704.4502 | 704.4489 | [M+H]+ | -2.0 | 18.15 | 2.05E+04 |
| PS(31:1) | C37H70NO10P | 719.4737 | 720.4815 | 720.4796 | [M+H]+ | -2.7 | 17.26 | 2.18E+05 |
| PS(32:1) | C38H72NO10P | 733.4894 | 734.4972 | 734.4954 | [M+H]+ | -2.4 | 28.00 | 8.50E+04 |
| PS(33:0) | C39H76NO10P | 749.5207 | 750.5285 | 750.5268 | [M+H]+ | -2.3 | 23.46 | 1.29E+04 |
| PS(33:1) | C39H74NO10P | 747.5050 | 748.5128 | 748.5128 | [M+H]+ | -0.1 | 22.36 | 1.91E+04 |
| PS(34:1) | C40H76NO10P | 761.5207 | 762.5285 | 762.5268 | [M+H]+ | -2.2 | 29.92 | 1.37E+06 |
| PS(36:2) | C42H78NO10P | 787.5363 | 788.5441 | 788.5423 | [M+H]+ | -2.4 | 30.44 | 1.92E+06 |
| PS(36:3) | C42H76NO10P | 785.5207 | 786.5285 | 786.5263 | [M+H]+ | -2.7 | 28.24 | 4.52E+05 |
| PS(36:4) | C42H74NO10P | 783.5050 | 784.5128 | 784.5085 | [M+H]+ | -5.5 | 25.68 | 5.47E+04 |
| PS(37:1) | C43H82NO10P | 803.5676 | 804.5754 | 804.5741 | [M+H]+ | -1.7 | 24.94 | 1.68E+04 |
| PS(38:4) | C44H78NO10P | 811.5363 | 812.5441 | 812.5417 | [M+H]+ | -3.0 | 31.15 | 2.08E+06 |
| PS(38:5) | C44H76NO10P | 809.5207 | 810.5285 | 810.5283 | [M+H]+ | -0.3 | 27.03 | 2.21E+05 |
| PS(40:6) | C46H78NO10P | 835.5363 | 836.5441 | 836.5421 | [M+H]+ | -2.4 | 30.52 | 2.11E+06 |

|           |             |          |          |          |                      |      |       |          |
|-----------|-------------|----------|----------|----------|----------------------|------|-------|----------|
| PS(42:9)  | C48H76NO10P | 857.5207 | 858.5285 | 858.5316 | [M+H] <sup>+</sup>   | 3.6  | 22.60 | 3.66E+04 |
| PS(44:10) | C50H78NO10P | 883.5363 | 884.5441 | 884.5434 | [M+H] <sup>+</sup>   | -0.8 | 24.53 | 2.12E+05 |
| PS(44:8)  | C50H82NO10P | 887.5676 | 888.5754 | 888.5750 | [M+H] <sup>+</sup>   | -0.5 | 25.35 | 1.09E+05 |
| SM(d30:1) | C35H71N2O6P | 646.5050 | 647.5128 | 647.5119 | [M+H] <sup>+</sup>   | -1.3 | 25.60 | 1.56E+05 |
| SM(d32:1) | C37H75N2O6P | 674.5363 | 675.5441 | 675.5420 | [M+H] <sup>+</sup>   | -3.0 | 28.49 | 8.58E+06 |
| SM(d33:1) | C38H77N2O6P | 688.5519 | 689.5597 | 689.5578 | [M+H] <sup>+</sup>   | -2.8 | 29.16 | 1.35E+06 |
| SM(d34:1) | C39H79N2O6P | 702.5675 | 703.5754 | 703.5731 | [M+H] <sup>+</sup>   | -3.2 | 33.00 | 6.57E+07 |
| SM(d34:2) | C39H77N2O6P | 700.5519 | 701.5597 | 701.5577 | [M+H] <sup>+</sup>   | -2.8 | 29.15 | 1.33E+07 |
| SM(d36:2) | C41H81N2O6P | 728.5832 | 729.5910 | 729.5897 | [M+H] <sup>+</sup>   | -1.8 | 33.11 | 6.27E+05 |
| SM(d39:2) | C44H87N2O6P | 770.6301 | 771.6380 | 771.6454 | [M+H] <sup>+</sup>   | 9.6  | 21.58 | 1.07E+05 |
| SM(d40:1) | C45H91N2O6P | 786.6614 | 787.6693 | 787.6669 | [M+H] <sup>+</sup>   | -3.0 | 49.89 | 3.75E+06 |
| SM(d42:0) | C47H97N2O6P | 816.7084 | 817.7162 | 817.7157 | [M+H] <sup>+</sup>   | -0.6 | 56.49 | 1.15E+06 |
| SM(d42:1) | C47H95N2O6P | 814.6927 | 815.7006 | 815.6975 | [M+H] <sup>+</sup>   | -3.8 | 50.19 | 1.76E+07 |
| SM(d42:2) | C47H93N2O6P | 812.6771 | 813.6849 | 813.6823 | [M+H] <sup>+</sup>   | -3.2 | 49.32 | 2.84E+07 |
| SM(d44:1) | C49H99N2O6P | 842.7240 | 843.7319 | 843.7292 | [M+H] <sup>+</sup>   | -3.2 | 57.59 | 4.18E+05 |
| SM(d44:2) | C49H97N2O6P | 840.7084 | 841.7162 | 841.7122 | [M+H] <sup>+</sup>   | -4.8 | 53.12 | 6.37E+05 |
| TG(46:0)  | C49H94O6    | 778.7050 | 796.7394 | 796.7370 | [M+NH4] <sup>+</sup> | -3.0 | 65.74 | 3.40E+06 |
| TG(48:0)  | C51H98O6    | 806.7363 | 824.7707 | 824.7685 | [M+NH4] <sup>+</sup> | -2.6 | 67.25 | 5.32E+06 |
| TG(48:1)  | C51H96O6    | 804.7207 | 822.7550 | 822.7535 | [M+NH4] <sup>+</sup> | -1.8 | 64.60 | 1.15E+07 |
| TG(48:3)  | C51H92O6    | 800.6894 | 818.7237 | 818.7215 | [M+NH4] <sup>+</sup> | -2.7 | 61.98 | 1.74E+06 |
| TG(49:1)  | C52H98O6    | 818.7363 | 836.7707 | 836.7681 | [M+NH4] <sup>+</sup> | -3.1 | 65.46 | 1.80E+06 |
| TG(49:2)  | C52H96O6    | 816.7207 | 834.7550 | 834.7533 | [M+NH4] <sup>+</sup> | -2.1 | 64.52 | 1.41E+06 |
| TG(50:0)  | C53H102O6   | 834.7676 | 852.8020 | 852.8004 | [M+NH4] <sup>+</sup> | -1.9 | 69.14 | 1.69E+06 |
| TG(50:1)  | C53H100O6   | 832.7520 | 850.7863 | 850.7857 | [M+NH4] <sup>+</sup> | -0.8 | 65.95 | 4.43E+06 |
| TG(50:2)  | C53H98O6    | 830.7363 | 848.7707 | 848.7688 | [M+NH4] <sup>+</sup> | -2.2 | 65.84 | 2.23E+06 |
| TG(50:3)  | C53H96O6    | 828.7207 | 846.7550 | 846.7518 | [M+NH4] <sup>+</sup> | -3.8 | 63.05 | 5.15E+06 |
| TG(50:4)  | C53H94O6    | 826.7050 | 844.7394 | 844.7372 | [M+NH4] <sup>+</sup> | -2.6 | 62.10 | 7.31E+05 |
| TG(51:1)  | C54H102O6   | 846.7676 | 864.8020 | 864.7989 | [M+NH4] <sup>+</sup> | -3.5 | 67.11 | 2.71E+06 |
| TG(51:2)  | C54H100O6   | 844.7520 | 862.7863 | 862.7837 | [M+NH4] <sup>+</sup> | -3.0 | 66.09 | 1.93E+06 |
| TG(51:3)  | C54H98O6    | 842.7363 | 860.7707 | 860.7677 | [M+NH4] <sup>+</sup> | -3.5 | 64.17 | 1.43E+06 |
| TG(52:0)  | C55H106O6   | 862.7989 | 880.8333 | 880.8336 | [M+NH4] <sup>+</sup> | 0.4  | 70.52 | 1.56E+06 |
| TG(52:1)  | C55H104O6   | 860.7832 | 878.8176 | 878.8148 | [M+NH4] <sup>+</sup> | -3.2 | 68.72 | 1.93E+06 |
| TG(52:2)  | C55H102O6   | 858.7676 | 876.8020 | 876.7995 | [M+NH4] <sup>+</sup> | -2.8 | 67.26 | 2.31E+06 |
| TG(52:4)  | C55H98O6    | 854.7363 | 872.7707 | 872.7684 | [M+NH4] <sup>+</sup> | -2.6 | 63.67 | 3.67E+06 |

|          |           |          |          |          |          |      |       |          |
|----------|-----------|----------|----------|----------|----------|------|-------|----------|
| TG(52:5) | C55H96O6  | 852.7207 | 870.7550 | 870.7524 | [M+NH4]+ | -3.0 | 62.95 | 2.34E+06 |
| TG(52:6) | C55H94O6  | 850.7050 | 868.7394 | 868.7371 | [M+NH4]+ | -2.6 | 62.13 | 4.71E+05 |
| TG(52:7) | C55H92O6  | 848.6894 | 866.7237 | 866.7218 | [M+NH4]+ | -2.3 | 60.33 | 2.36E+05 |
| TG(53:1) | C56H106O6 | 874.7989 | 892.8333 | 892.8302 | [M+NH4]+ | -3.4 | 68.45 | 8.13E+05 |
| TG(53:2) | C56H104O6 | 872.7832 | 890.8176 | 890.8143 | [M+NH4]+ | -3.8 | 67.00 | 4.11E+06 |
| TG(53:3) | C56H102O6 | 870.7676 | 888.8020 | 888.7986 | [M+NH4]+ | -3.8 | 65.32 | 2.41E+06 |
| TG(53:4) | C56H100O6 | 868.7520 | 886.7863 | 886.7837 | [M+NH4]+ | -3.0 | 64.61 | 7.25E+05 |
| TG(54:0) | C57H110O6 | 890.8302 | 908.8646 | 908.8656 | [M+NH4]+ | 1.2  | 71.97 | 2.68E+05 |
| TG(54:2) | C57H106O6 | 886.7989 | 904.8333 | 904.8308 | [M+NH4]+ | -2.7 | 68.73 | 7.31E+05 |
| TG(54:3) | C57H104O6 | 884.7832 | 902.8176 | 902.8133 | [M+NH4]+ | -4.8 | 65.79 | 5.88E+06 |
| TG(54:4) | C57H102O6 | 882.7676 | 900.8020 | 900.7980 | [M+NH4]+ | -4.4 | 65.41 | 4.29E+06 |
| TG(54:5) | C57H100O6 | 880.7520 | 898.7863 | 898.7829 | [M+NH4]+ | -3.8 | 64.65 | 4.59E+06 |
| TG(54:6) | C57H98O6  | 878.7363 | 896.7707 | 896.7678 | [M+NH4]+ | -3.3 | 63.06 | 2.40E+06 |
| TG(54:7) | C57H96O6  | 876.7207 | 894.7550 | 894.7517 | [M+NH4]+ | -3.7 | 62.40 | 2.12E+06 |
| TG(54:8) | C57H94O6  | 874.7050 | 892.7394 | 892.7364 | [M+NH4]+ | -3.3 | 60.95 | 2.77E+05 |
| TG(55:2) | C58H108O6 | 900.8145 | 918.8489 | 918.8459 | [M+NH4]+ | -3.3 | 68.02 | 4.57E+05 |
| TG(55:3) | C58H106O6 | 898.7989 | 916.8333 | 916.8298 | [M+NH4]+ | -3.8 | 67.51 | 5.39E+05 |
| TG(55:4) | C58H104O6 | 896.7832 | 914.8176 | 914.8153 | [M+NH4]+ | -2.6 | 65.58 | 2.21E+05 |
| TG(55:7) | C58H98O6  | 890.7363 | 908.7707 | 908.7677 | [M+NH4]+ | -3.3 | 63.21 | 4.15E+05 |
| TG(56:0) | C59H114O6 | 918.8615 | 936.8959 | 936.8969 | [M+NH4]+ | 1.1  | 72.80 | 4.23E+05 |
| TG(56:1) | C59H112O6 | 916.8458 | 934.8802 | 934.8785 | [M+NH4]+ | -1.9 | 70.75 | 1.73E+06 |
| TG(56:4) | C59H106O6 | 910.7989 | 928.8333 | 928.8298 | [M+NH4]+ | -3.8 | 66.40 | 1.53E+06 |
| TG(56:5) | C59H104O6 | 908.7832 | 926.8176 | 926.8135 | [M+NH4]+ | -4.5 | 66.26 | 2.53E+06 |
| TG(56:6) | C59H102O6 | 906.7676 | 924.8020 | 924.7982 | [M+NH4]+ | -4.1 | 65.20 | 3.52E+06 |
| TG(56:7) | C59H100O6 | 904.7520 | 922.7863 | 922.7830 | [M+NH4]+ | -3.6 | 64.12 | 7.38E+06 |
| TG(56:8) | C59H98O6  | 902.7363 | 920.7707 | 920.7672 | [M+NH4]+ | -3.7 | 63.00 | 1.18E+06 |
| TG(57:1) | C60H114O6 | 930.8615 | 948.8959 | 948.8967 | [M+NH4]+ | 0.9  | 70.83 | 1.99E+05 |
| TG(57:3) | C60H110O6 | 926.8302 | 944.8646 | 944.8614 | [M+NH4]+ | -3.3 | 68.04 | 2.92E+05 |
| TG(57:4) | C60H108O6 | 924.8145 | 942.8489 | 942.8454 | [M+NH4]+ | -3.7 | 67.38 | 2.79E+05 |
| TG(57:6) | C60H104O6 | 920.7832 | 938.8176 | 938.8155 | [M+NH4]+ | -2.3 | 65.24 | 3.09E+05 |
| TG(57:7) | C60H102O6 | 918.7676 | 936.8020 | 936.7987 | [M+NH4]+ | -3.5 | 64.42 | 5.89E+05 |
| TG(57:8) | C60H100O6 | 916.7520 | 934.7863 | 934.7840 | [M+NH4]+ | -2.5 | 63.42 | 2.64E+05 |
| TG(58:0) | C61H118O6 | 946.8928 | 964.9272 | 964.9271 | [M+NH4]+ | -0.1 | 73.88 | 4.40E+05 |
| TG(58:1) | C61H116O6 | 944.8771 | 962.9115 | 962.9082 | [M+NH4]+ | -3.4 | 71.81 | 3.27E+06 |

|           |                                                 |           |           |           |                                   |      |       |          |
|-----------|-------------------------------------------------|-----------|-----------|-----------|-----------------------------------|------|-------|----------|
| TG(58:10) | C <sub>61</sub> H <sub>98</sub> O <sub>6</sub>  | 926.7363  | 944.7707  | 944.7685  | [M+NH <sub>4</sub> ] <sup>+</sup> | -2.3 | 62.30 | 1.90E+05 |
| TG(58:2)  | C <sub>61</sub> H <sub>114</sub> O <sub>6</sub> | 942.8615  | 960.8959  | 960.8945  | [M+NH <sub>4</sub> ] <sup>+</sup> | -1.4 | 70.59 | 1.05E+06 |
| TG(58:3)  | C <sub>61</sub> H <sub>112</sub> O <sub>6</sub> | 940.8458  | 958.8802  | 958.8762  | [M+NH <sub>4</sub> ] <sup>+</sup> | -4.1 | 68.95 | 1.87E+06 |
| TG(58:4)  | C <sub>61</sub> H <sub>110</sub> O <sub>6</sub> | 938.8302  | 956.8646  | 956.8613  | [M+NH <sub>4</sub> ] <sup>+</sup> | -3.4 | 68.18 | 6.55E+05 |
| TG(58:5)  | C <sub>61</sub> H <sub>108</sub> O <sub>6</sub> | 936.8145  | 954.8489  | 954.8442  | [M+NH <sub>4</sub> ] <sup>+</sup> | -5.0 | 67.71 | 8.21E+05 |
| TG(58:6)  | C <sub>61</sub> H <sub>106</sub> O <sub>6</sub> | 934.7989  | 952.8333  | 952.8286  | [M+NH <sub>4</sub> ] <sup>+</sup> | -4.9 | 66.36 | 1.33E+06 |
| TG(58:7)  | C <sub>61</sub> H <sub>104</sub> O <sub>6</sub> | 932.7832  | 950.8176  | 950.8109  | [M+NH <sub>4</sub> ] <sup>+</sup> | -7.1 | 64.36 | 1.49E+06 |
| TG(58:8)  | C <sub>61</sub> H <sub>102</sub> O <sub>6</sub> | 930.7676  | 948.8020  | 948.7995  | [M+NH <sub>4</sub> ] <sup>+</sup> | -2.6 | 63.93 | 3.53E+06 |
| TG(58:9)  | C <sub>61</sub> H <sub>100</sub> O <sub>6</sub> | 928.7520  | 946.7863  | 946.7825  | [M+NH <sub>4</sub> ] <sup>+</sup> | -4.0 | 63.37 | 9.86E+05 |
| TG(59:3)  | C <sub>62</sub> H <sub>114</sub> O <sub>6</sub> | 954.8615  | 972.8959  | 972.8943  | [M+NH <sub>4</sub> ] <sup>+</sup> | -1.6 | 69.22 | 1.51E+05 |
| TG(60:0)  | C <sub>63</sub> H <sub>122</sub> O <sub>6</sub> | 974.9241  | 992.9585  | 992.9594  | [M+NH <sub>4</sub> ] <sup>+</sup> | 0.9  | 74.99 | 5.32E+05 |
| TG(60:1)  | C <sub>63</sub> H <sub>120</sub> O <sub>6</sub> | 972.9084  | 990.9428  | 990.9414  | [M+NH <sub>4</sub> ] <sup>+</sup> | -1.5 | 73.03 | 1.49E+06 |
| TG(60:10) | C <sub>63</sub> H <sub>102</sub> O <sub>6</sub> | 954.7676  | 972.8020  | 972.7990  | [M+NH <sub>4</sub> ] <sup>+</sup> | -3.0 | 63.59 | 3.74E+05 |
| TG(60:11) | C <sub>63</sub> H <sub>100</sub> O <sub>6</sub> | 952.7520  | 970.7863  | 970.7846  | [M+NH <sub>4</sub> ] <sup>+</sup> | -1.7 | 62.20 | 1.60E+05 |
| TG(60:12) | C <sub>63</sub> H <sub>98</sub> O <sub>6</sub>  | 950.7363  | 968.7707  | 968.7687  | [M+NH <sub>4</sub> ] <sup>+</sup> | -2.1 | 62.03 | 2.56E+05 |
| TG(60:2)  | C <sub>63</sub> H <sub>118</sub> O <sub>6</sub> | 970.8928  | 988.9272  | 988.9263  | [M+NH <sub>4</sub> ] <sup>+</sup> | -0.9 | 71.67 | 9.99E+05 |
| TG(60:3)  | C <sub>63</sub> H <sub>116</sub> O <sub>6</sub> | 968.8771  | 986.9115  | 986.9094  | [M+NH <sub>4</sub> ] <sup>+</sup> | -2.1 | 69.93 | 2.78E+06 |
| TG(60:4)  | C <sub>63</sub> H <sub>114</sub> O <sub>6</sub> | 966.8615  | 984.8959  | 984.8945  | [M+NH <sub>4</sub> ] <sup>+</sup> | -1.4 | 69.61 | 1.49E+05 |
| TG(60:5)  | C <sub>63</sub> H <sub>112</sub> O <sub>6</sub> | 964.8458  | 982.8802  | 982.8769  | [M+NH <sub>4</sub> ] <sup>+</sup> | -3.4 | 68.84 | 1.27E+05 |
| TG(60:6)  | C <sub>63</sub> H <sub>110</sub> O <sub>6</sub> | 962.8302  | 980.8646  | 980.8615  | [M+NH <sub>4</sub> ] <sup>+</sup> | -3.1 | 66.91 | 1.53E+05 |
| TG(60:7)  | C <sub>63</sub> H <sub>108</sub> O <sub>6</sub> | 960.8145  | 978.8489  | 978.8453  | [M+NH <sub>4</sub> ] <sup>+</sup> | -3.7 | 67.28 | 2.40E+05 |
| TG(60:8)  | C <sub>63</sub> H <sub>106</sub> O <sub>6</sub> | 958.7989  | 976.8333  | 976.8299  | [M+NH <sub>4</sub> ] <sup>+</sup> | -3.4 | 65.80 | 8.76E+05 |
| TG(60:9)  | C <sub>63</sub> H <sub>104</sub> O <sub>6</sub> | 956.7832  | 974.8176  | 974.8148  | [M+NH <sub>4</sub> ] <sup>+</sup> | -2.9 | 64.62 | 3.92E+05 |
| TG(61:3)  | C <sub>64</sub> H <sub>118</sub> O <sub>6</sub> | 982.8928  | 1000.9272 | 1000.9254 | [M+NH <sub>4</sub> ] <sup>+</sup> | -1.8 | 70.28 | 9.44E+04 |
| TG(62:0)  | C <sub>65</sub> H <sub>126</sub> O <sub>6</sub> | 1002.9554 | 1020.9898 | 1020.9896 | [M+NH <sub>4</sub> ] <sup>+</sup> | -0.2 | 75.64 | 7.74E+04 |
| TG(62:1)  | C <sub>65</sub> H <sub>124</sub> O <sub>6</sub> | 1000.9397 | 1018.9741 | 1018.9734 | [M+NH <sub>4</sub> ] <sup>+</sup> | -0.7 | 73.18 | 1.22E+05 |
| TG(62:10) | C <sub>65</sub> H <sub>106</sub> O <sub>6</sub> | 982.7989  | 1000.8333 | 1000.8329 | [M+NH <sub>4</sub> ] <sup>+</sup> | -0.3 | 64.32 | 2.39E+05 |
| TG(62:11) | C <sub>65</sub> H <sub>104</sub> O <sub>6</sub> | 980.7832  | 998.8176  | 998.8159  | [M+NH <sub>4</sub> ] <sup>+</sup> | -1.7 | 64.30 | 4.96E+05 |
| TG(62:12) | C <sub>65</sub> H <sub>102</sub> O <sub>6</sub> | 978.7676  | 996.8020  | 996.7989  | [M+NH <sub>4</sub> ] <sup>+</sup> | -3.1 | 62.42 | 2.55E+05 |
| TG(62:2)  | C <sub>65</sub> H <sub>122</sub> O <sub>6</sub> | 998.9241  | 1016.9585 | 1016.9591 | [M+NH <sub>4</sub> ] <sup>+</sup> | 0.6  | 72.99 | 2.61E+05 |
| TG(62:3)  | C <sub>65</sub> H <sub>120</sub> O <sub>6</sub> | 996.9084  | 1014.9428 | 1014.9407 | [M+NH <sub>4</sub> ] <sup>+</sup> | -2.0 | 71.57 | 3.32E+05 |
| TG(62:5)  | C <sub>65</sub> H <sub>116</sub> O <sub>6</sub> | 992.8771  | 1010.9115 | 1010.9105 | [M+NH <sub>4</sub> ] <sup>+</sup> | -1.0 | 69.78 | 9.37E+04 |
| TG(62:6)  | C <sub>65</sub> H <sub>114</sub> O <sub>6</sub> | 990.8615  | 1008.8959 | 1008.8931 | [M+NH <sub>4</sub> ] <sup>+</sup> | -2.7 | 68.58 | 1.21E+05 |
| TG(64:1)  | C <sub>67</sub> H <sub>128</sub> O <sub>6</sub> | 1028.9710 | 1047.0054 | 1047.0046 | [M+NH <sub>4</sub> ] <sup>+</sup> | -0.8 | 74.24 | 1.52E+05 |

|          |                                                 |           |           |           |                                   |      |       |          |
|----------|-------------------------------------------------|-----------|-----------|-----------|-----------------------------------|------|-------|----------|
| TG(64:2) | C <sub>67</sub> H <sub>126</sub> O <sub>6</sub> | 1026.9554 | 1044.9898 | 1044.9882 | [M+NH <sub>4</sub> ] <sup>+</sup> | -1.5 | 72.85 | 8.33E+04 |
| TG(64:3) | C <sub>67</sub> H <sub>124</sub> O <sub>6</sub> | 1024.9397 | 1042.9741 | 1042.9724 | [M+NH <sub>4</sub> ] <sup>+</sup> | -1.6 | 71.76 | 1.66E+05 |
| TG(64:4) | C <sub>67</sub> H <sub>122</sub> O <sub>6</sub> | 1022.9241 | 1040.9585 | 1040.9576 | [M+NH <sub>4</sub> ] <sup>+</sup> | -0.8 | 71.04 | 1.01E+05 |
| TG(64:5) | C <sub>67</sub> H <sub>120</sub> O <sub>6</sub> | 1020.9084 | 1038.9428 | 1038.9420 | [M+NH <sub>4</sub> ] <sup>+</sup> | -0.8 | 71.03 | 1.16E+05 |
| TG(64:6) | C <sub>67</sub> H <sub>118</sub> O <sub>6</sub> | 1018.8928 | 1036.9272 | 1036.9258 | [M+NH <sub>4</sub> ] <sup>+</sup> | -1.3 | 69.89 | 1.73E+05 |
| TG(66:0) | C <sub>69</sub> H <sub>134</sub> O <sub>6</sub> | 1059.0180 | 1077.0524 | 1077.0541 | [M+NH <sub>4</sub> ] <sup>+</sup> | 1.6  | 77.85 | 2.54E+04 |
| TG(66:1) | C <sub>69</sub> H <sub>132</sub> O <sub>6</sub> | 1057.0023 | 1075.0367 | 1075.0358 | [M+NH <sub>4</sub> ] <sup>+</sup> | -0.9 | 75.22 | 1.14E+05 |
| TG(66:2) | C <sub>69</sub> H <sub>130</sub> O <sub>6</sub> | 1054.9867 | 1073.0211 | 1073.0203 | [M+NH <sub>4</sub> ] <sup>+</sup> | -0.7 | 73.84 | 1.06E+05 |
| TG(66:3) | C <sub>69</sub> H <sub>128</sub> O <sub>6</sub> | 1052.9710 | 1071.0054 | 1071.0053 | [M+NH <sub>4</sub> ] <sup>+</sup> | -0.1 | 72.75 | 1.04E+05 |
