# Supplementary material
Source: PubMed Central journal article supplement (PMC3531553)
Supplement: NIHMS427979-supplement-Table_S6.pdf [file NIHMS427979-supplement-Table_S6.pdf]

Table S6. List of all lipid molecular species identified from rat plasma using capillary UPLC-MS and the HSS T3 material. The chain length denotes the total number of acyl carbons followed by total double bonds.

| Molecular Species      | Formula                                         | Formula Mass<br>(isotopic) | Expected<br><i>m/z</i> | Observed<br><i>m/z</i> | Ion Type                          | Mass Error<br>(ppm) | Retention<br>Time (min) | Ion<br>Intensity |
|------------------------|-------------------------------------------------|----------------------------|------------------------|------------------------|-----------------------------------|---------------------|-------------------------|------------------|
| 16:0 Cholesteryl ester | C <sub>43</sub> H <sub>76</sub> O <sub>2</sub>  | 624.5845                   | 642.6189               | 642.6182               | [M+NH <sub>4</sub> ] <sup>+</sup> | -1.03               | 70.01                   | 5.94E+04         |
| 16:1 Cholesteryl ester | C <sub>43</sub> H <sub>74</sub> O <sub>2</sub>  | 622.5689                   | 640.6032               | 640.6020               | [M+NH <sub>4</sub> ] <sup>+</sup> | -1.94               | 67.17                   | 1.74E+05         |
| 17:0 Cholesteryl ester | C <sub>44</sub> H <sub>78</sub> O <sub>2</sub>  | 638.6002                   | 656.6345               | 656.6341               | [M+NH <sub>4</sub> ] <sup>+</sup> | -0.69               | 70.84                   | 2.77E+05         |
| 17:1 Cholesteryl ester | C <sub>44</sub> H <sub>76</sub> O <sub>2</sub>  | 636.5845                   | 654.6189               | 654.6186               | [M+NH <sub>4</sub> ] <sup>+</sup> | -0.38               | 68.67                   | 2.54E+05         |
| 18:0 Cholesteryl ester | C <sub>45</sub> H <sub>80</sub> O <sub>2</sub>  | 652.6158                   | 670.6502               | 670.6487               | [M+NH <sub>4</sub> ] <sup>+</sup> | -2.17               | 70.92                   | 6.67E+05         |
| 18:1 Cholesteryl ester | C <sub>45</sub> H <sub>78</sub> O <sub>2</sub>  | 650.6002                   | 668.6345               | 668.6343               | [M+NH <sub>4</sub> ] <sup>+</sup> | -0.39               | 71.24                   | 1.59E+05         |
| 18:2 Cholesteryl ester | C <sub>45</sub> H <sub>76</sub> O <sub>2</sub>  | 648.5845                   | 666.6189               | 666.6176               | [M+NH <sub>4</sub> ] <sup>+</sup> | -1.93               | 67.03                   | 1.29E+06         |
| 18:3 Cholesteryl ester | C <sub>45</sub> H <sub>74</sub> O <sub>2</sub>  | 646.5689                   | 664.6032               | 664.6004               | [M+NH <sub>4</sub> ] <sup>+</sup> | -4.28               | 65.72                   | 2.68E+05         |
| 20:4 Cholesteryl ester | C <sub>47</sub> H <sub>76</sub> O <sub>2</sub>  | 672.5845                   | 690.6189               | 690.6183               | [M+NH <sub>4</sub> ] <sup>+</sup> | -0.80               | 67.01                   | 1.03E+06         |
| 20:5 Cholesteryl ester | C <sub>47</sub> H <sub>74</sub> O <sub>2</sub>  | 670.5689                   | 688.6032               | 688.6003               | [M+NH <sub>4</sub> ] <sup>+</sup> | -4.25               | 65.71                   | 1.92E+06         |
| 22:4 Cholesteryl ester | C <sub>49</sub> H <sub>80</sub> O <sub>2</sub>  | 700.6158                   | 718.6502               | 718.6501               | [M+NH <sub>4</sub> ] <sup>+</sup> | -0.08               | 75.71                   | 3.51E+04         |
| 22:6 Cholesteryl ester | C <sub>49</sub> H <sub>76</sub> O <sub>2</sub>  | 696.5845                   | 714.6189               | 714.6180               | [M+NH <sub>4</sub> ] <sup>+</sup> | -1.26               | 75.11                   | 4.49E+04         |
| Cer(d40:1)             | C <sub>40</sub> H <sub>79</sub> NO <sub>3</sub> | 621.6060                   | 622.6138               | 622.6124               | [M+H] <sup>+</sup>                | -2.20               | 54.15                   | 1.83E+05         |
| Cer(d41:1)             | C <sub>41</sub> H <sub>81</sub> NO <sub>3</sub> | 635.6216                   | 636.6294               | 636.6279               | [M+H] <sup>+</sup>                | -2.48               | 56.67                   | 2.92E+05         |
| Cer(d42:1)             | C <sub>42</sub> H <sub>83</sub> NO <sub>3</sub> | 649.6373                   | 650.6451               | 650.6440               | [M+H] <sup>+</sup>                | -1.62               | 57.74                   | 2.68E+06         |
| Cer(d42:2)             | C <sub>42</sub> H <sub>81</sub> NO <sub>3</sub> | 647.6216                   | 648.6294               | 648.6281               | [M+H] <sup>+</sup>                | -2.08               | 51.35                   | 2.67E+05         |
| Cer(d43:1)             | C <sub>43</sub> H <sub>85</sub> NO <sub>3</sub> | 663.6529                   | 664.6607               | 664.6591               | [M+H] <sup>+</sup>                | -2.41               | 57.05                   | 4.90E+05         |
| Cer(t42:0)             | C <sub>42</sub> H <sub>85</sub> NO <sub>4</sub> | 667.6478                   | 668.6557               | 668.6544               | [M+H] <sup>+</sup>                | -1.89               | 56.01                   | 7.49E+05         |
| Cholesterol            | C <sub>27</sub> H <sub>46</sub> O               | 386.3549                   | 404.3892               | 404.3878               | [M+NH <sub>4</sub> ] <sup>+</sup> | -3.63               | 35.65                   | 3.53E+05         |
| DG(36:1)               | C <sub>39</sub> H <sub>74</sub> O <sub>5</sub>  | 622.5536                   | 640.5880               | 640.5861               | [M+NH <sub>4</sub> ] <sup>+</sup> | -2.92               | 50.36                   | 7.08E+04         |
| DG(36:2)               | C <sub>39</sub> H <sub>72</sub> O <sub>5</sub>  | 620.5379                   | 638.5723               | 638.5705               | [M+NH <sub>4</sub> ] <sup>+</sup> | -2.81               | 49.66                   | 6.38E+05         |
| DG(36:3)               | C <sub>39</sub> H <sub>70</sub> O <sub>5</sub>  | 618.5223                   | 636.5567               | 636.5545               | [M+NH <sub>4</sub> ] <sup>+</sup> | -3.36               | 45.10                   | 2.51E+06         |
| DG(36:4)               | C <sub>39</sub> H <sub>68</sub> O <sub>5</sub>  | 616.5066                   | 634.5410               | 634.5385               | [M+NH <sub>4</sub> ] <sup>+</sup> | -3.91               | 40.07                   | 2.30E+06         |

|          |                                                |          |          |          |                                   |       |       |          |
|----------|------------------------------------------------|----------|----------|----------|-----------------------------------|-------|-------|----------|
| DG(36:5) | C <sub>39</sub> H <sub>66</sub> O <sub>5</sub> | 614.4910 | 632.5254 | 632.5233 | [M+NH <sub>4</sub> ] <sup>+</sup> | -3.28 | 36.56 | 3.27E+05 |
| DG(38:0) | C <sub>41</sub> H <sub>80</sub> O <sub>5</sub> | 652.6005 | 670.6349 | 670.6402 | [M+NH <sub>4</sub> ] <sup>+</sup> | 7.92  | 69.87 | 1.99E+05 |
| DG(38:1) | C <sub>41</sub> H <sub>78</sub> O <sub>5</sub> | 650.5849 | 668.6193 | 668.6239 | [M+NH <sub>4</sub> ] <sup>+</sup> | 6.94  | 69.03 | 7.47E+05 |
| DG(38:2) | C <sub>41</sub> H <sub>76</sub> O <sub>5</sub> | 648.5692 | 666.6036 | 666.6079 | [M+NH <sub>4</sub> ] <sup>+</sup> | 6.37  | 67.67 | 1.47E+05 |
| DG(38:4) | C <sub>41</sub> H <sub>72</sub> O <sub>5</sub> | 644.5379 | 662.5723 | 662.5704 | [M+NH <sub>4</sub> ] <sup>+</sup> | -2.84 | 49.73 | 9.08E+04 |
| DG(38:5) | C <sub>41</sub> H <sub>70</sub> O <sub>5</sub> | 642.5223 | 660.5567 | 660.5549 | [M+NH <sub>4</sub> ] <sup>+</sup> | -2.70 | 43.95 | 5.07E+05 |
| DG(38:6) | C <sub>41</sub> H <sub>68</sub> O <sub>5</sub> | 640.5066 | 658.5410 | 658.5387 | [M+NH <sub>4</sub> ] <sup>+</sup> | -3.55 | 39.95 | 4.18E+05 |
| DG(38:7) | C <sub>41</sub> H <sub>66</sub> O <sub>5</sub> | 638.4910 | 656.5254 | 656.5232 | [M+NH <sub>4</sub> ] <sup>+</sup> | -3.27 | 35.95 | 3.50E+05 |
| DG(39:1) | C <sub>42</sub> H <sub>80</sub> O <sub>5</sub> | 664.6005 | 682.6349 | 682.6402 | [M+NH <sub>4</sub> ] <sup>+</sup> | 7.80  | 68.41 | 7.57E+04 |
| DG(40:3) | C <sub>43</sub> H <sub>78</sub> O <sub>5</sub> | 674.5849 | 692.6193 | 692.6227 | [M+NH <sub>4</sub> ] <sup>+</sup> | 5.00  | 66.69 | 2.56E+06 |
| DG(40:5) | C <sub>43</sub> H <sub>74</sub> O <sub>5</sub> | 670.5536 | 688.5880 | 688.5860 | [M+NH <sub>4</sub> ] <sup>+</sup> | -2.80 | 47.85 | 1.11E+05 |
| DG(40:7) | C <sub>43</sub> H <sub>70</sub> O <sub>5</sub> | 666.5223 | 684.5567 | 684.5544 | [M+NH <sub>4</sub> ] <sup>+</sup> | -3.34 | 41.91 | 3.10E+05 |
| DG(40:8) | C <sub>43</sub> H <sub>68</sub> O <sub>5</sub> | 664.5066 | 682.5410 | 682.5381 | [M+NH <sub>4</sub> ] <sup>+</sup> | -4.35 | 37.95 | 4.54E+05 |
| DG(41:3) | C <sub>44</sub> H <sub>80</sub> O <sub>5</sub> | 688.6005 | 706.6349 | 706.6388 | [M+NH <sub>4</sub> ] <sup>+</sup> | 5.54  | 67.43 | 9.54E+04 |
| DG(42:3) | C <sub>45</sub> H <sub>82</sub> O <sub>5</sub> | 702.6162 | 720.6506 | 720.6547 | [M+NH <sub>4</sub> ] <sup>+</sup> | 5.74  | 67.50 | 7.06E+04 |
| DG(42:5) | C <sub>45</sub> H <sub>78</sub> O <sub>5</sub> | 698.5849 | 716.6193 | 716.6223 | [M+NH <sub>4</sub> ] <sup>+</sup> | 4.29  | 65.73 | 2.18E+05 |
| DG(44:8) | C <sub>47</sub> H <sub>76</sub> O <sub>5</sub> | 720.5692 | 738.6036 | 738.6011 | [M+NH <sub>4</sub> ] <sup>+</sup> | -3.44 | 63.09 | 4.88E+05 |
| FA(13:0) | C <sub>13</sub> H <sub>26</sub> O <sub>2</sub> | 214.1933 | 213.1854 | 213.1862 | [M-H] <sup>-</sup>                | 3.73  | 16.29 | 1.04E+05 |
| FA(14:0) | C <sub>14</sub> H <sub>28</sub> O <sub>2</sub> | 228.2089 | 227.2011 | 227.2018 | [M-H] <sup>-</sup>                | 3.29  | 17.66 | 1.40E+06 |
| FA(14:1) | C <sub>14</sub> H <sub>26</sub> O <sub>2</sub> | 226.1933 | 225.1854 | 225.1864 | [M-H] <sup>-</sup>                | 4.38  | 15.21 | 7.01E+04 |
| FA(15:0) | C <sub>15</sub> H <sub>30</sub> O <sub>2</sub> | 242.2246 | 241.2167 | 241.2174 | [M-H] <sup>-</sup>                | 2.72  | 20.02 | 6.26E+05 |
| FA(16:0) | C <sub>16</sub> H <sub>32</sub> O <sub>2</sub> | 256.2402 | 255.2324 | 255.2325 | [M-H] <sup>-</sup>                | 0.47  | 22.01 | 4.40E+07 |
| FA(16:1) | C <sub>16</sub> H <sub>30</sub> O <sub>2</sub> | 254.2246 | 253.2167 | 253.2177 | [M-H] <sup>-</sup>                | 3.58  | 19.41 | 1.17E+06 |
| FA(17:0) | C <sub>17</sub> H <sub>34</sub> O <sub>2</sub> | 270.2559 | 269.2480 | 269.2493 | [M-H] <sup>-</sup>                | 4.48  | 23.80 | 1.57E+06 |
| FA(17:1) | C <sub>17</sub> H <sub>32</sub> O <sub>2</sub> | 268.2402 | 267.2324 | 267.2333 | [M-H] <sup>-</sup>                | 3.28  | 21.28 | 2.16E+05 |
| FA(18:0) | C <sub>18</sub> H <sub>36</sub> O <sub>2</sub> | 284.2715 | 283.2637 | 283.2641 | [M-H] <sup>-</sup>                | 1.55  | 26.19 | 1.36E+07 |
| FA(18:1) | C <sub>18</sub> H <sub>34</sub> O <sub>2</sub> | 282.2559 | 281.2480 | 281.2481 | [M-H] <sup>-</sup>                | 0.07  | 22.56 | 2.79E+07 |
| FA(18:3) | C <sub>18</sub> H <sub>30</sub> O <sub>2</sub> | 278.2246 | 277.2167 | 277.2177 | [M-H] <sup>-</sup>                | 3.56  | 17.30 | 3.10E+06 |

|                                       |                                                   |          |          |          |                    |       |       |          |
|---------------------------------------|---------------------------------------------------|----------|----------|----------|--------------------|-------|-------|----------|
| FA(18:4)                              | C <sub>18</sub> H <sub>28</sub> O <sub>2</sub>    | 276.2089 | 275.2011 | 275.2018 | [M-H] <sup>-</sup> | 2.64  | 15.95 | 1.00E+06 |
| FA(19:0)                              | C <sub>19</sub> H <sub>38</sub> O <sub>2</sub>    | 298.2872 | 297.2793 | 297.2802 | [M-H] <sup>-</sup> | 2.88  | 27.55 | 2.81E+05 |
| FA(20:0)                              | C <sub>20</sub> H <sub>40</sub> O <sub>2</sub>    | 312.3028 | 311.2950 | 311.2959 | [M-H] <sup>-</sup> | 2.95  | 29.46 | 2.20E+05 |
| FA(20:1)                              | C <sub>20</sub> H <sub>38</sub> O <sub>2</sub>    | 310.2872 | 309.2794 | 309.2798 | [M-H] <sup>-</sup> | 1.26  | 26.26 | 4.90E+05 |
| FA(20:2)                              | C <sub>20</sub> H <sub>36</sub> O <sub>2</sub>    | 308.2715 | 307.2637 | 307.2642 | [M-H] <sup>-</sup> | 1.75  | 24.01 | 1.84E+05 |
| FA(20:3)                              | C <sub>20</sub> H <sub>34</sub> O <sub>2</sub>    | 306.2559 | 305.2481 | 305.2482 | [M-H] <sup>-</sup> | 0.26  | 22.21 | 9.24E+04 |
| FA(20:4)                              | C <sub>20</sub> H <sub>32</sub> O <sub>2</sub>    | 304.2402 | 303.2324 | 303.2325 | [M-H] <sup>-</sup> | 0.43  | 19.80 | 9.23E+06 |
| FA(20:5)                              | C <sub>20</sub> H <sub>30</sub> O <sub>2</sub>    | 302.2246 | 301.2167 | 301.2177 | [M-H] <sup>-</sup> | 3.14  | 17.34 | 2.51E+06 |
| FA(22:0)                              | C <sub>22</sub> H <sub>44</sub> O <sub>2</sub>    | 340.3341 | 339.3263 | 339.3273 | [M-H] <sup>-</sup> | 3.03  | 34.35 | 4.33E+04 |
| FA(22:1)                              | C <sub>22</sub> H <sub>42</sub> O <sub>2</sub>    | 338.3185 | 337.3106 | 337.3116 | [M-H] <sup>-</sup> | 2.72  | 29.19 | 5.85E+04 |
| FA(22:2)                              | C <sub>22</sub> H <sub>40</sub> O <sub>2</sub>    | 336.3028 | 335.2950 | 335.2960 | [M-H] <sup>-</sup> | 2.88  | 26.45 | 9.61E+04 |
| FA(22:3)                              | C <sub>22</sub> H <sub>38</sub> O <sub>2</sub>    | 334.2872 | 333.2793 | 333.2800 | [M-H] <sup>-</sup> | 1.94  | 24.88 | 5.61E+04 |
| FA(22:4)                              | C <sub>22</sub> H <sub>36</sub> O <sub>2</sub>    | 332.2715 | 331.2637 | 331.2638 | [M-H] <sup>-</sup> | 0.42  | 22.02 | 5.09E+06 |
| FA(22:5)                              | C <sub>22</sub> H <sub>34</sub> O <sub>2</sub>    | 330.2559 | 329.2481 | 329.2490 | [M-H] <sup>-</sup> | 2.85  | 20.79 | 1.40E+06 |
| FA(22:6)                              | C <sub>22</sub> H <sub>32</sub> O <sub>2</sub>    | 328.2402 | 327.2324 | 327.2332 | [M-H] <sup>-</sup> | 2.32  | 18.14 | 2.78E+06 |
| FA(24:0)                              | C <sub>24</sub> H <sub>48</sub> O <sub>2</sub>    | 368.3654 | 367.3576 | 367.3585 | [M-H] <sup>-</sup> | 2.55  | 40.56 | 1.81E+05 |
| FA(24:1)                              | C <sub>24</sub> H <sub>46</sub> O <sub>2</sub>    | 366.3497 | 365.3419 | 365.3431 | [M-H] <sup>-</sup> | 3.36  | 33.46 | 1.09E+05 |
| FA(26:0)                              | C <sub>26</sub> H <sub>52</sub> O <sub>2</sub>    | 396.3967 | 395.3889 | 395.3902 | [M-H] <sup>-</sup> | 3.25  | 47.72 | 9.06E+04 |
| FA(26:1)                              | C <sub>26</sub> H <sub>50</sub> O <sub>2</sub>    | 394.3811 | 393.3732 | 393.3741 | [M-H] <sup>-</sup> | 2.28  | 40.37 | 3.45E+04 |
| LPA(14:0)                             | C <sub>17</sub> H <sub>35</sub> O <sub>7</sub> P  | 382.2120 | 381.2042 | 381.2056 | [M-H] <sup>-</sup> | 3.74  | 11.01 | 2.41E+04 |
| LPA(16:0)                             | C <sub>19</sub> H <sub>39</sub> O <sub>7</sub> P  | 410.2433 | 409.2355 | 409.2364 | [M-H] <sup>-</sup> | 2.24  | 18.56 | 6.11E+04 |
| LPC(14:0) or PC(O-14:0)               | C <sub>22</sub> H <sub>46</sub> NO <sub>7</sub> P | 467.3012 | 468.3090 | 468.3085 | [M+H] <sup>+</sup> | -1.15 | 12.87 | 4.64E+06 |
| LPC(15:0)                             | C <sub>23</sub> H <sub>48</sub> NO <sub>7</sub> P | 481.3168 | 482.3246 | 482.3233 | [M+H] <sup>+</sup> | -2.88 | 14.00 | 3.25E+06 |
| LPC(16:1)                             | C <sub>24</sub> H <sub>48</sub> NO <sub>7</sub> P | 493.3168 | 494.3246 | 494.3235 | [M+H] <sup>+</sup> | -2.24 | 13.38 | 6.86E+06 |
| LPC(17:0) or PC(O-17:0)               | C <sub>25</sub> H <sub>52</sub> NO <sub>7</sub> P | 509.3481 | 510.3559 | 510.3544 | [M+H] <sup>+</sup> | -3.01 | 16.74 | 6.06E+06 |
| LPC(17:1)                             | C <sub>25</sub> H <sub>50</sub> NO <sub>7</sub> P | 507.3325 | 508.3403 | 508.3376 | [M+H] <sup>+</sup> | -5.23 | 15.18 | 1.24E+06 |
| LPC(17:2)                             | C <sub>25</sub> H <sub>48</sub> NO <sub>7</sub> P | 505.3168 | 506.3246 | 506.3240 | [M+H] <sup>+</sup> | -1.20 | 12.91 | 7.94E+04 |
| LPC(18:0) or PC(O-18:0)               | C <sub>26</sub> H <sub>54</sub> NO <sub>7</sub> P | 523.3638 | 524.3716 | 524.3693 | [M+H] <sup>+</sup> | -4.45 | 19.12 | 6.53E+08 |
| LPC(18:1) or PC(O-18:1) or PC(P-18:0) | C <sub>26</sub> H <sub>52</sub> NO <sub>7</sub> P | 521.3481 | 522.3559 | 522.3519 | [M+H] <sup>+</sup> | -7.68 | 14.91 | 9.98E+06 |
| LPC(18:3)                             | C <sub>26</sub> H <sub>48</sub> NO <sub>7</sub> P | 517.3168 | 518.3246 | 518.3248 | [M+H] <sup>+</sup> | 0.29  | 12.58 | 4.33E+06 |

|                                       |                                                   |          |          |          |                    |       |       |          |
|---------------------------------------|---------------------------------------------------|----------|----------|----------|--------------------|-------|-------|----------|
| LPC(19:0) or PC(O-19:0)               | C <sub>27</sub> H <sub>56</sub> NO <sub>7</sub> P | 537.3794 | 538.3872 | 538.3834 | [M+H] <sup>+</sup> | -7.20 | 19.95 | 3.30E+06 |
| LPC(19:1) or PC(O-19:1)               | C <sub>27</sub> H <sub>54</sub> NO <sub>7</sub> P | 535.3638 | 536.3716 | 536.3681 | [M+H] <sup>+</sup> | -6.45 | 17.76 | 1.28E+06 |
| LPC(20:0) or PC(O-20:0)               | C <sub>28</sub> H <sub>58</sub> NO <sub>7</sub> P | 551.3951 | 552.4029 | 552.4022 | [M+H] <sup>+</sup> | -1.26 | 22.98 | 9.24E+06 |
| LPC(20:1) or PC(O-20:1) or PC(P-20:0) | C <sub>28</sub> H <sub>56</sub> NO <sub>7</sub> P | 549.3794 | 550.3872 | 550.3839 | [M+H] <sup>+</sup> | -6.08 | 19.72 | 8.27E+06 |
| LPC(20:2) or PC(O-20:2)               | C <sub>28</sub> H <sub>54</sub> NO <sub>7</sub> P | 547.3638 | 548.3716 | 548.3690 | [M+H] <sup>+</sup> | -4.74 | 16.90 | 8.62E+06 |
| LPC(20:3)                             | C <sub>28</sub> H <sub>52</sub> NO <sub>7</sub> P | 545.3481 | 546.3559 | 546.3526 | [M+H] <sup>+</sup> | -6.10 | 14.87 | 6.22E+06 |
| LPC(20:4)                             | C <sub>28</sub> H <sub>50</sub> NO <sub>7</sub> P | 543.3325 | 544.3403 | 544.3369 | [M+H] <sup>+</sup> | -6.17 | 15.67 | 7.84E+06 |
| LPC(22:0) or PC(O-22:0)               | C <sub>30</sub> H <sub>62</sub> NO <sub>7</sub> P | 579.4264 | 580.4342 | 580.4325 | [M+H] <sup>+</sup> | -2.84 | 26.69 | 1.35E+06 |
| LPC(22:1)                             | C <sub>30</sub> H <sub>60</sub> NO <sub>7</sub> P | 577.4107 | 578.4185 | 578.4175 | [M+H] <sup>+</sup> | -1.79 | 22.75 | 1.34E+06 |
| LPC(22:2)                             | C <sub>30</sub> H <sub>58</sub> NO <sub>7</sub> P | 575.3951 | 576.4029 | 576.3997 | [M+H] <sup>+</sup> | -5.60 | 20.03 | 3.19E+05 |
| LPC(22:4)                             | C <sub>30</sub> H <sub>54</sub> NO <sub>7</sub> P | 571.3638 | 572.3716 | 572.3688 | [M+H] <sup>+</sup> | -4.96 | 16.17 | 1.90E+06 |
| LPC(22:6)                             | C <sub>30</sub> H <sub>50</sub> NO <sub>7</sub> P | 567.3325 | 568.3403 | 568.3403 | [M+H] <sup>+</sup> | -0.08 | 12.59 | 1.60E+06 |
| LPC(24:0)                             | C <sub>32</sub> H <sub>66</sub> NO <sub>7</sub> P | 607.4577 | 608.4655 | 608.4640 | [M+H] <sup>+</sup> | -2.49 | 29.94 | 1.47E+06 |
| LPC(O-15:0) or PC(O-14:0/O-1:0)       | C <sub>23</sub> H <sub>50</sub> NO <sub>6</sub> P | 467.3376 | 468.3454 | 468.3443 | [M+H] <sup>+</sup> | -2.26 | 21.60 | 1.41E+05 |
| LPC(O-16:0) or PC(O-8:0/O-8:0)        | C <sub>24</sub> H <sub>52</sub> NO <sub>6</sub> P | 481.3532 | 482.3610 | 482.3601 | [M+H] <sup>+</sup> | -2.03 | 17.08 | 3.41E+06 |
| LPC(O-18:0) or PC(O-16:0/O-2:0)       | C <sub>26</sub> H <sub>56</sub> NO <sub>6</sub> P | 509.3845 | 510.3923 | 510.3911 | [M+H] <sup>+</sup> | -2.36 | 19.92 | 3.60E+05 |
| LPC(O-18:1) or LPC(P-18:0)            | C <sub>26</sub> H <sub>54</sub> NO <sub>6</sub> P | 507.3689 | 508.3767 | 508.3750 | [M+H] <sup>+</sup> | -3.30 | 18.08 | 1.95E+07 |
| LPC(O-20:0) or PC(O-18:0/O-2:0)       | C <sub>28</sub> H <sub>60</sub> NO <sub>6</sub> P | 537.4158 | 538.4236 | 538.4234 | [M+H] <sup>+</sup> | -0.33 | 25.19 | 4.89E+05 |
| LPE(16:0)                             | C <sub>21</sub> H <sub>44</sub> NO <sub>7</sub> P | 453.2855 | 454.2933 | 454.2924 | [M+H] <sup>+</sup> | -2.12 | 17.00 | 9.80E+05 |
| LPE(18:0)                             | C <sub>23</sub> H <sub>48</sub> NO <sub>7</sub> P | 481.3168 | 482.3246 | 482.3230 | [M+H] <sup>+</sup> | -3.48 | 19.53 | 8.53E+05 |
| LPE(18:1)                             | C <sub>23</sub> H <sub>46</sub> NO <sub>7</sub> P | 479.3012 | 480.3090 | 480.3075 | [M+H] <sup>+</sup> | -3.11 | 17.22 | 9.33E+05 |
| LPE(18:2)                             | C <sub>23</sub> H <sub>44</sub> NO <sub>7</sub> P | 477.2855 | 478.2933 | 478.2919 | [M+H] <sup>+</sup> | -2.94 | 13.67 | 3.16E+05 |
| LPE(20:4)                             | C <sub>25</sub> H <sub>44</sub> NO <sub>7</sub> P | 501.2855 | 502.2933 | 502.2920 | [M+H] <sup>+</sup> | -2.62 | 14.34 | 1.42E+06 |
| LPE(22:4)                             | C <sub>27</sub> H <sub>48</sub> NO <sub>7</sub> P | 529.3168 | 530.3246 | 530.3215 | [M+H] <sup>+</sup> | -5.97 | 16.82 | 1.39E+05 |
| LPE(22:6)                             | C <sub>27</sub> H <sub>44</sub> NO <sub>7</sub> P | 525.2855 | 526.2933 | 526.2914 | [M+H] <sup>+</sup> | -3.67 | 14.07 | 1.10E+06 |
| LPI(18:0)                             | C <sub>27</sub> H <sub>53</sub> O <sub>12</sub> P | 600.3275 | 599.3196 | 599.3203 | [M-H] <sup>-</sup> | 1.17  | 15.46 | 9.95E+04 |
| LPI(20:4)                             | C <sub>29</sub> H <sub>49</sub> O <sub>12</sub> P | 620.2962 | 619.2883 | 619.2896 | [M-H] <sup>-</sup> | 2.02  | 11.59 | 1.47E+05 |
| PA(34:1)                              | C <sub>37</sub> H <sub>71</sub> O <sub>8</sub> P  | 674.4886 | 673.4808 | 673.4830 | [M-H] <sup>-</sup> | 3.28  | 29.33 | 5.16E+04 |
| PC(31:2)                              | C <sub>39</sub> H <sub>74</sub> NO <sub>8</sub> P | 715.5152 | 716.5230 | 716.5214 | [M+H] <sup>+</sup> | -2.23 | 34.68 | 2.11E+05 |
| PC(32:0)                              | C <sub>40</sub> H <sub>80</sub> NO <sub>8</sub> P | 733.5621 | 734.5700 | 734.5679 | [M+H] <sup>+</sup> | -2.73 | 38.37 | 4.34E+06 |

|          |            |          |          |          |                    |       |       |          |
|----------|------------|----------|----------|----------|--------------------|-------|-------|----------|
| PC(32:1) | C40H78NO8P | 731.5465 | 732.5543 | 732.5533 | [M+H] <sup>+</sup> | -1.35 | 33.29 | 2.97E+06 |
| PC(32:2) | C40H76NO8P | 729.5308 | 730.5387 | 730.5377 | [M+H] <sup>+</sup> | -1.25 | 29.05 | 1.48E+06 |
| PC(33:0) | C41H82NO8P | 747.5778 | 748.5856 | 748.5840 | [M+H] <sup>+</sup> | -2.12 | 40.85 | 3.68E+05 |
| PC(33:1) | C41H80NO8P | 745.5621 | 746.5700 | 746.5678 | [M+H] <sup>+</sup> | -2.85 | 35.49 | 3.91E+05 |
| PC(33:2) | C41H78NO8P | 743.5465 | 744.5543 | 744.5534 | [M+H] <sup>+</sup> | -1.24 | 31.40 | 1.78E+06 |
| PC(33:4) | C41H74NO8P | 739.5152 | 740.5230 | 740.5224 | [M+H] <sup>+</sup> | -0.83 | 31.96 | 2.18E+05 |
| PC(34:0) | C42H84NO8P | 761.5934 | 762.6012 | 762.5999 | [M+H] <sup>+</sup> | -1.77 | 45.09 | 1.05E+07 |
| PC(34:1) | C42H82NO8P | 759.5778 | 760.5856 | 760.5841 | [M+H] <sup>+</sup> | -1.98 | 37.74 | 5.06E+07 |
| PC(34:2) | C42H80NO8P | 757.5621 | 758.5700 | 758.5686 | [M+H] <sup>+</sup> | -1.79 | 35.82 | 1.23E+07 |
| PC(34:3) | C42H78NO8P | 755.5465 | 756.5543 | 756.5528 | [M+H] <sup>+</sup> | -2.04 | 29.45 | 4.29E+06 |
| PC(34:4) | C42H76NO8P | 753.5308 | 754.5387 | 754.5374 | [M+H] <sup>+</sup> | -1.70 | 29.10 | 7.98E+05 |
| PC(35:1) | C43H84NO8P | 773.5934 | 774.6012 | 774.6005 | [M+H] <sup>+</sup> | -0.92 | 40.48 | 7.23E+05 |
| PC(35:2) | C43H82NO8P | 771.5778 | 772.5856 | 772.5847 | [M+H] <sup>+</sup> | -1.20 | 36.26 | 6.32E+06 |
| PC(36:0) | C44H88NO8P | 789.6247 | 790.6325 | 790.6315 | [M+H] <sup>+</sup> | -1.28 | 40.47 | 1.94E+06 |
| PC(36:1) | C44H86NO8P | 787.6091 | 788.6169 | 788.6145 | [M+H] <sup>+</sup> | -3.05 | 43.33 | 1.55E+07 |
| PC(36:2) | C44H84NO8P | 785.5934 | 786.6012 | 786.5987 | [M+H] <sup>+</sup> | -3.23 | 39.72 | 3.41E+08 |
| PC(36:3) | C44H82NO8P | 783.5778 | 784.5856 | 784.5810 | [M+H] <sup>+</sup> | -5.83 | 34.05 | 4.75E+07 |
| PC(36:4) | C44H80NO8P | 781.5621 | 782.5700 | 782.5677 | [M+H] <sup>+</sup> | -2.85 | 30.90 | 9.76E+07 |
| PC(36:5) | C44H78NO8P | 779.5465 | 780.5543 | 780.5541 | [M+H] <sup>+</sup> | -0.26 | 28.65 | 3.97E+06 |
| PC(36:6) | C44H76NO8P | 777.5308 | 778.5387 | 778.5382 | [M+H] <sup>+</sup> | -0.59 | 27.18 | 3.15E+05 |
| PC(37:1) | C45H88NO8P | 801.6247 | 802.6325 | 802.6322 | [M+H] <sup>+</sup> | -0.42 | 46.73 | 1.03E+05 |
| PC(37:2) | C45H86NO8P | 799.6091 | 800.6169 | 800.6144 | [M+H] <sup>+</sup> | -3.15 | 41.56 | 2.15E+06 |
| PC(37:3) | C45H84NO8P | 797.5934 | 798.6012 | 798.5996 | [M+H] <sup>+</sup> | -2.11 | 37.66 | 4.51E+05 |
| PC(37:4) | C45H82NO8P | 795.5778 | 796.5856 | 796.5837 | [M+H] <sup>+</sup> | -2.36 | 35.21 | 1.56E+06 |
| PC(37:6) | C45H78NO8P | 791.5465 | 792.5543 | 792.5534 | [M+H] <sup>+</sup> | -1.09 | 30.81 | 1.74E+06 |
| PC(38:0) | C46H92NO8P | 817.6560 | 818.6638 | 818.6623 | [M+H] <sup>+</sup> | -1.83 | 55.87 | 4.44E+04 |
| PC(38:1) | C46H90NO8P | 815.6404 | 816.6482 | 816.6476 | [M+H] <sup>+</sup> | -0.77 | 50.39 | 3.60E+05 |
| PC(38:2) | C46H88NO8P | 813.6247 | 814.6325 | 814.6327 | [M+H] <sup>+</sup> | 0.20  | 47.50 | 7.96E+05 |
| PC(38:3) | C46H86NO8P | 811.6091 | 812.6169 | 812.6140 | [M+H] <sup>+</sup> | -3.57 | 41.22 | 2.59E+07 |
| PC(38:4) | C46H84NO8P | 809.5934 | 810.6012 | 810.5984 | [M+H] <sup>+</sup> | -3.57 | 35.34 | 7.15E+07 |

|           |                                                   |          |          |          |                    |       |       |          |
|-----------|---------------------------------------------------|----------|----------|----------|--------------------|-------|-------|----------|
| PC(38:5)  | C <sub>46</sub> H <sub>82</sub> NO <sub>8</sub> P | 807.5778 | 808.5856 | 808.5823 | [M+H] <sup>+</sup> | -4.11 | 33.87 | 4.53E+07 |
| PC(38:6)  | C <sub>46</sub> H <sub>80</sub> NO <sub>8</sub> P | 805.5621 | 806.5700 | 806.5680 | [M+H] <sup>+</sup> | -2.41 | 30.75 | 9.82E+07 |
| PC(38:7)  | C <sub>46</sub> H <sub>78</sub> NO <sub>8</sub> P | 803.5465 | 804.5543 | 804.5532 | [M+H] <sup>+</sup> | -1.43 | 28.74 | 2.18E+06 |
| PC(39:2)  | C <sub>47</sub> H <sub>90</sub> NO <sub>8</sub> P | 827.6404 | 828.6482 | 828.6447 | [M+H] <sup>+</sup> | -4.23 | 49.71 | 7.88E+04 |
| PC(39:4)  | C <sub>47</sub> H <sub>86</sub> NO <sub>8</sub> P | 823.6091 | 824.6169 | 824.6128 | [M+H] <sup>+</sup> | -4.97 | 42.07 | 2.30E+06 |
| PC(39:5)  | C <sub>47</sub> H <sub>84</sub> NO <sub>8</sub> P | 821.5934 | 822.6012 | 822.5991 | [M+H] <sup>+</sup> | -2.65 | 36.65 | 6.31E+05 |
| PC(39:6)  | C <sub>47</sub> H <sub>82</sub> NO <sub>8</sub> P | 819.5778 | 820.5856 | 820.5825 | [M+H] <sup>+</sup> | -3.71 | 34.55 | 2.31E+06 |
| PC(40:1)  | C <sub>48</sub> H <sub>94</sub> NO <sub>8</sub> P | 843.6717 | 844.6795 | 844.6773 | [M+H] <sup>+</sup> | -2.59 | 49.28 | 7.17E+04 |
| PC(40:2)  | C <sub>48</sub> H <sub>92</sub> NO <sub>8</sub> P | 841.6560 | 842.6638 | 842.6609 | [M+H] <sup>+</sup> | -3.50 | 51.78 | 5.33E+05 |
| PC(40:3)  | C <sub>48</sub> H <sub>90</sub> NO <sub>8</sub> P | 839.6404 | 840.6482 | 840.6463 | [M+H] <sup>+</sup> | -2.25 | 48.69 | 6.59E+04 |
| PC(40:4)  | C <sub>48</sub> H <sub>88</sub> NO <sub>8</sub> P | 837.6247 | 838.6325 | 838.6280 | [M+H] <sup>+</sup> | -5.36 | 42.68 | 7.68E+06 |
| PC(40:5)  | C <sub>48</sub> H <sub>86</sub> NO <sub>8</sub> P | 835.6091 | 836.6169 | 836.6123 | [M+H] <sup>+</sup> | -5.52 | 39.27 | 2.06E+07 |
| PC(40:6)  | C <sub>48</sub> H <sub>84</sub> NO <sub>8</sub> P | 833.5934 | 834.6012 | 834.5969 | [M+H] <sup>+</sup> | -5.22 | 38.35 | 4.87E+07 |
| PC(40:7)  | C <sub>48</sub> H <sub>82</sub> NO <sub>8</sub> P | 831.5778 | 832.5856 | 832.5826 | [M+H] <sup>+</sup> | -3.58 | 32.49 | 1.06E+07 |
| PC(40:8)  | C <sub>48</sub> H <sub>80</sub> NO <sub>8</sub> P | 829.5621 | 830.5700 | 830.5680 | [M+H] <sup>+</sup> | -2.36 | 30.77 | 1.74E+07 |
| PC(40:9)  | C <sub>48</sub> H <sub>78</sub> NO <sub>8</sub> P | 827.5465 | 828.5543 | 828.5490 | [M+H] <sup>+</sup> | -6.37 | 32.22 | 7.14E+05 |
| PC(41:2)  | C <sub>49</sub> H <sub>94</sub> NO <sub>8</sub> P | 855.6717 | 856.6795 | 856.6774 | [M+H] <sup>+</sup> | -2.45 | 54.37 | 1.67E+05 |
| PC(41:4)  | C <sub>49</sub> H <sub>90</sub> NO <sub>8</sub> P | 851.6404 | 852.6482 | 852.6466 | [M+H] <sup>+</sup> | -1.82 | 46.71 | 3.69E+04 |
| PC(41:5)  | C <sub>49</sub> H <sub>88</sub> NO <sub>8</sub> P | 849.6247 | 850.6325 | 850.6299 | [M+H] <sup>+</sup> | -3.12 | 42.77 | 1.37E+05 |
| PC(41:6)  | C <sub>49</sub> H <sub>86</sub> NO <sub>8</sub> P | 847.6091 | 848.6169 | 848.6140 | [M+H] <sup>+</sup> | -3.43 | 40.84 | 1.06E+06 |
| PC(42:10) | C <sub>50</sub> H <sub>80</sub> NO <sub>8</sub> P | 853.5621 | 854.5700 | 854.5674 | [M+H] <sup>+</sup> | -2.94 | 29.75 | 1.28E+07 |
| PC(42:11) | C <sub>50</sub> H <sub>78</sub> NO <sub>8</sub> P | 851.5465 | 852.5543 | 852.5598 | [M+H] <sup>+</sup> | 6.47  | 27.29 | 3.26E+06 |
| PC(42:2)  | C <sub>50</sub> H <sub>96</sub> NO <sub>8</sub> P | 869.6873 | 870.6951 | 870.6943 | [M+H] <sup>+</sup> | -1.03 | 57.00 | 5.82E+05 |
| PC(42:3)  | C <sub>50</sub> H <sub>94</sub> NO <sub>8</sub> P | 867.6717 | 868.6795 | 868.6770 | [M+H] <sup>+</sup> | -2.91 | 50.53 | 1.74E+05 |
| PC(42:4)  | C <sub>50</sub> H <sub>92</sub> NO <sub>8</sub> P | 865.6560 | 866.6638 | 866.6610 | [M+H] <sup>+</sup> | -3.29 | 44.13 | 2.83E+05 |
| PC(42:5)  | C <sub>50</sub> H <sub>90</sub> NO <sub>8</sub> P | 863.6404 | 864.6482 | 864.6456 | [M+H] <sup>+</sup> | -2.97 | 44.97 | 3.15E+05 |
| PC(42:6)  | C <sub>50</sub> H <sub>88</sub> NO <sub>8</sub> P | 861.6247 | 862.6325 | 862.6300 | [M+H] <sup>+</sup> | -2.96 | 40.79 | 1.31E+06 |
| PC(42:7)  | C <sub>50</sub> H <sub>86</sub> NO <sub>8</sub> P | 859.6091 | 860.6169 | 860.6124 | [M+H] <sup>+</sup> | -5.16 | 37.18 | 8.70E+05 |
| PC(42:8)  | C <sub>50</sub> H <sub>84</sub> NO <sub>8</sub> P | 857.5934 | 858.6012 | 858.5977 | [M+H] <sup>+</sup> | -4.12 | 33.53 | 1.53E+06 |
| PC(42:9)  | C <sub>50</sub> H <sub>82</sub> NO <sub>8</sub> P | 855.5778 | 856.5856 | 856.5837 | [M+H] <sup>+</sup> | -2.19 | 31.23 | 1.95E+06 |

|                                        |                                                    |          |          |          |                    |       |       |          |
|----------------------------------------|----------------------------------------------------|----------|----------|----------|--------------------|-------|-------|----------|
| PC(44:10)                              | C <sub>52</sub> H <sub>84</sub> NO <sub>8</sub> P  | 881.5934 | 882.6012 | 882.5987 | [M+H] <sup>+</sup> | -2.83 | 29.23 | 1.06E+05 |
| PC(44:12)                              | C <sub>52</sub> H <sub>80</sub> NO <sub>8</sub> P  | 877.5621 | 878.5700 | 878.5725 | [M+H] <sup>+</sup> | 2.93  | 27.40 | 1.39E+06 |
| PC(44:3)                               | C <sub>52</sub> H <sub>98</sub> NO <sub>8</sub> P  | 895.7030 | 896.7108 | 896.7104 | [M+H] <sup>+</sup> | -0.39 | 51.32 | 3.83E+04 |
| PC(44:4)                               | C <sub>52</sub> H <sub>96</sub> NO <sub>8</sub> P  | 893.6873 | 894.6951 | 894.6945 | [M+H] <sup>+</sup> | -0.76 | 55.65 | 2.36E+05 |
| PC(44:5)                               | C <sub>52</sub> H <sub>94</sub> NO <sub>8</sub> P  | 891.6717 | 892.6795 | 892.6772 | [M+H] <sup>+</sup> | -2.57 | 50.62 | 1.46E+05 |
| PC(46:0)                               | C <sub>54</sub> H <sub>108</sub> NO <sub>8</sub> P | 929.7812 | 930.7890 | 930.7894 | [M+H] <sup>+</sup> | 0.39  | 54.03 | 1.98E+05 |
| PC(46:1)                               | C <sub>54</sub> H <sub>106</sub> NO <sub>8</sub> P | 927.7656 | 928.7734 | 928.7754 | [M+H] <sup>+</sup> | 2.17  | 55.81 | 7.64E+04 |
| PC(48:0)                               | C <sub>56</sub> H <sub>112</sub> NO <sub>8</sub> P | 957.8125 | 958.8203 | 958.8262 | [M+H] <sup>+</sup> | 6.12  | 57.85 | 3.66E+04 |
| PC(O-16:0)                             | C <sub>24</sub> H <sub>50</sub> NO <sub>7</sub> P  | 495.3325 | 496.3403 | 496.3384 | [M+H] <sup>+</sup> | -3.78 | 18.01 | 1.04E+07 |
| PC(O-16:0/O-16:0)                      | C <sub>40</sub> H <sub>84</sub> NO <sub>6</sub> P  | 705.6036 | 706.6114 | 706.6124 | [M+H] <sup>+</sup> | 1.44  | 56.60 | 1.56E+06 |
| PC(O-16:0/O-18:0)                      | C <sub>42</sub> H <sub>88</sub> NO <sub>6</sub> P  | 733.6349 | 734.6427 | 734.6435 | [M+H] <sup>+</sup> | 1.03  | 58.90 | 3.99E+05 |
| PC(O-16:0/O-18:1) or PC(O-18:1/O-16:0) | C <sub>42</sub> H <sub>86</sub> NO <sub>6</sub> P  | 731.6192 | 732.6271 | 732.6285 | [M+H] <sup>+</sup> | 1.99  | 57.71 | 1.35E+05 |
| PC(O-18:1/O-1:0)                       | C <sub>27</sub> H <sub>56</sub> NO <sub>6</sub> P  | 521.3845 | 522.3923 | 522.3922 | [M+H] <sup>+</sup> | -0.24 | 23.22 | 1.64E+04 |
| PC(O-32:0)                             | C <sub>40</sub> H <sub>82</sub> NO <sub>7</sub> P  | 719.5829 | 720.5907 | 720.5884 | [M+H] <sup>+</sup> | -3.11 | 43.15 | 1.72E+06 |
| PC(O-32:1) or PC(P-32:0)               | C <sub>40</sub> H <sub>80</sub> NO <sub>7</sub> P  | 717.5672 | 718.5750 | 718.5732 | [M+H] <sup>+</sup> | -2.56 | 36.19 | 3.64E+05 |
| PC(O-33:2) or PC(P-33:1)               | C <sub>41</sub> H <sub>80</sub> NO <sub>7</sub> P  | 729.5672 | 730.5750 | 730.5744 | [M+H] <sup>+</sup> | -0.93 | 48.64 | 1.28E+05 |
| PC(O-34:0)                             | C <sub>42</sub> H <sub>86</sub> NO <sub>7</sub> P  | 747.6142 | 748.6220 | 748.6207 | [M+H] <sup>+</sup> | -1.78 | 50.42 | 2.57E+05 |
| PC(O-34:1) or PC(P-34:0)               | C <sub>42</sub> H <sub>84</sub> NO <sub>7</sub> P  | 745.5985 | 746.6063 | 746.6045 | [M+H] <sup>+</sup> | -2.43 | 41.67 | 5.18E+06 |
| PC(O-34:2) or PC(P-34:1)               | C <sub>42</sub> H <sub>82</sub> NO <sub>7</sub> P  | 743.5829 | 744.5907 | 744.5893 | [M+H] <sup>+</sup> | -1.81 | 36.65 | 1.77E+06 |
| PC(O-34:3) or PC(P-34:2)               | C <sub>42</sub> H <sub>80</sub> NO <sub>7</sub> P  | 741.5672 | 742.5750 | 742.5736 | [M+H] <sup>+</sup> | -1.92 | 36.46 | 3.76E+05 |
| PC(O-35:1) or PC(P-35:0)               | C <sub>43</sub> H <sub>86</sub> NO <sub>7</sub> P  | 759.6142 | 760.6220 | 760.6225 | [M+H] <sup>+</sup> | 0.68  | 53.80 | 8.71E+04 |
| PC(O-35:2)                             | C <sub>43</sub> H <sub>84</sub> NO <sub>7</sub> P  | 757.5985 | 758.6063 | 758.6053 | [M+H] <sup>+</sup> | -1.33 | 54.01 | 4.94E+04 |
| PC(O-36:0)                             | C <sub>44</sub> H <sub>90</sub> NO <sub>7</sub> P  | 775.6455 | 776.6533 | 776.6537 | [M+H] <sup>+</sup> | 0.48  | 49.26 | 6.13E+04 |
| PC(O-36:1) or PC(P-36:0)               | C <sub>44</sub> H <sub>88</sub> NO <sub>7</sub> P  | 773.6298 | 774.6376 | 774.6365 | [M+H] <sup>+</sup> | -1.49 | 49.59 | 1.79E+05 |
| PC(O-36:2) or PC(P-36:1)               | C <sub>44</sub> H <sub>86</sub> NO <sub>7</sub> P  | 771.6142 | 772.6220 | 772.6218 | [M+H] <sup>+</sup> | -0.27 | 41.23 | 6.06E+05 |
| PC(O-36:3) or PC(P-36:2)               | C <sub>44</sub> H <sub>84</sub> NO <sub>7</sub> P  | 769.5985 | 770.6063 | 770.6061 | [M+H] <sup>+</sup> | -0.26 | 37.86 | 6.49E+05 |
| PC(O-36:4) or PC(P-36:3)               | C <sub>44</sub> H <sub>82</sub> NO <sub>7</sub> P  | 767.5829 | 768.5907 | 768.5888 | [M+H] <sup>+</sup> | -2.46 | 37.25 | 5.28E+06 |
| PC(O-36:5) or PC(P-36:4)               | C <sub>44</sub> H <sub>80</sub> NO <sub>7</sub> P  | 765.5672 | 766.5750 | 766.5728 | [M+H] <sup>+</sup> | -2.88 | 35.98 | 1.76E+06 |
| PC(O-38:2) or PC(P-38:1)               | C <sub>46</sub> H <sub>90</sub> NO <sub>7</sub> P  | 799.6455 | 800.6533 | 800.6532 | [M+H] <sup>+</sup> | -0.16 | 42.56 | 1.71E+05 |
| PC(O-38:4) or PC(P-38:3)               | C <sub>46</sub> H <sub>86</sub> NO <sub>7</sub> P  | 795.6142 | 796.6220 | 796.6211 | [M+H] <sup>+</sup> | -1.08 | 42.38 | 1.92E+06 |

|                          |                                                   |          |          |          |                    |       |       |          |
|--------------------------|---------------------------------------------------|----------|----------|----------|--------------------|-------|-------|----------|
| PC(O-38:5) or PC(P-38:4) | C <sub>46</sub> H <sub>84</sub> NO <sub>7</sub> P | 793.5985 | 794.6063 | 794.6041 | [M+H] <sup>+</sup> | -2.81 | 37.25 | 5.04E+06 |
| PC(O-38:6) or PC(P-38:5) | C <sub>46</sub> H <sub>82</sub> NO <sub>7</sub> P | 791.5829 | 792.5907 | 792.5888 | [M+H] <sup>+</sup> | -2.38 | 36.23 | 2.63E+06 |
| PC(O-40:3) or PC(P-40:2) | C <sub>48</sub> H <sub>92</sub> NO <sub>7</sub> P | 825.6611 | 826.6689 | 826.6698 | [M+H] <sup>+</sup> | 1.02  | 49.60 | 3.11E+04 |
| PC(O-40:4) or PC(P-40:3) | C <sub>48</sub> H <sub>90</sub> NO <sub>7</sub> P | 823.6455 | 824.6533 | 824.6518 | [M+H] <sup>+</sup> | -1.77 | 46.24 | 3.75E+05 |
| PC(O-40:5) or PC(P-40:4) | C <sub>48</sub> H <sub>88</sub> NO <sub>7</sub> P | 821.6298 | 822.6376 | 822.6341 | [M+H] <sup>+</sup> | -4.27 | 40.08 | 1.30E+06 |
| PC(O-40:6) or PC(P-40:5) | C <sub>48</sub> H <sub>86</sub> NO <sub>7</sub> P | 819.6142 | 820.6220 | 820.6194 | [M+H] <sup>+</sup> | -3.16 | 37.62 | 1.05E+06 |
| PC(O-42:4)               | C <sub>50</sub> H <sub>94</sub> NO <sub>7</sub> P | 851.6768 | 852.6846 | 852.6818 | [M+H] <sup>+</sup> | -3.28 | 54.15 | 1.92E+05 |
| PC(O-42:6)               | C <sub>50</sub> H <sub>90</sub> NO <sub>7</sub> P | 847.6455 | 848.6533 | 848.6493 | [M+H] <sup>+</sup> | -4.70 | 41.93 | 2.15E+05 |
| PC(P-31:1)               | C <sub>39</sub> H <sub>76</sub> NO <sub>7</sub> P | 701.5359 | 702.5437 | 702.5419 | [M+H] <sup>+</sup> | -2.56 | 42.71 | 2.29E+05 |
| PC(P-38:6)               | C <sub>46</sub> H <sub>80</sub> NO <sub>7</sub> P | 789.5672 | 790.5750 | 790.5705 | [M+H] <sup>+</sup> | -5.73 | 31.24 | 5.85E+05 |
| PC(P-40:6)               | C <sub>48</sub> H <sub>84</sub> NO <sub>7</sub> P | 817.5985 | 818.6063 | 818.6038 | [M+H] <sup>+</sup> | -3.05 | 35.53 | 1.50E+06 |
| PC(P-42:4)               | C <sub>50</sub> H <sub>92</sub> NO <sub>7</sub> P | 849.6611 | 850.6689 | 850.6659 | [M+H] <sup>+</sup> | -3.62 | 49.19 | 2.16E+05 |
| PC(P-42:6)               | C <sub>50</sub> H <sub>88</sub> NO <sub>7</sub> P | 845.6298 | 846.6376 | 846.6336 | [M+H] <sup>+</sup> | -4.77 | 39.09 | 1.63E+05 |
| PE(34:2)                 | C <sub>39</sub> H <sub>74</sub> NO <sub>8</sub> P | 715.5152 | 716.5230 | 716.5214 | [M+H] <sup>+</sup> | -2.23 | 34.68 | 2.11E+05 |
| PE(35:0)                 | C <sub>40</sub> H <sub>80</sub> NO <sub>8</sub> P | 733.5621 | 734.5700 | 734.5681 | [M+H] <sup>+</sup> | -2.49 | 41.54 | 4.82E+05 |
| PE(35:1)                 | C <sub>40</sub> H <sub>78</sub> NO <sub>8</sub> P | 731.5465 | 732.5543 | 732.5533 | [M+H] <sup>+</sup> | -1.35 | 25.77 | 1.61E+05 |
| PE(36:0)                 | C <sub>41</sub> H <sub>82</sub> NO <sub>8</sub> P | 747.5778 | 748.5856 | 748.5839 | [M+H] <sup>+</sup> | -2.29 | 41.87 | 2.94E+05 |
| PE(36:1)                 | C <sub>41</sub> H <sub>80</sub> NO <sub>8</sub> P | 745.5621 | 746.5700 | 746.5678 | [M+H] <sup>+</sup> | -2.85 | 35.49 | 3.91E+05 |
| PE(36:2)                 | C <sub>41</sub> H <sub>78</sub> NO <sub>8</sub> P | 743.5465 | 744.5543 | 744.5548 | [M+H] <sup>+</sup> | 0.71  | 30.34 | 7.24E+05 |
| PE(36:4)                 | C <sub>41</sub> H <sub>74</sub> NO <sub>8</sub> P | 739.5152 | 740.5230 | 740.5224 | [M+H] <sup>+</sup> | -0.83 | 31.96 | 2.18E+05 |
| PE(37:0)                 | C <sub>42</sub> H <sub>84</sub> NO <sub>8</sub> P | 761.5934 | 762.6012 | 762.6009 | [M+H] <sup>+</sup> | -0.49 | 51.81 | 1.73E+05 |
| PE(37:2)                 | C <sub>42</sub> H <sub>80</sub> NO <sub>8</sub> P | 757.5621 | 758.5700 | 758.5682 | [M+H] <sup>+</sup> | -2.36 | 43.05 | 9.49E+05 |
| PE(37:4)                 | C <sub>42</sub> H <sub>76</sub> NO <sub>8</sub> P | 753.5308 | 754.5387 | 754.5385 | [M+H] <sup>+</sup> | -0.15 | 26.87 | 1.14E+05 |
| PE(38:2)                 | C <sub>43</sub> H <sub>82</sub> NO <sub>8</sub> P | 771.5778 | 772.5856 | 772.5856 | [M+H] <sup>+</sup> | 0.02  | 42.29 | 7.33E+04 |
| PE(38:4)                 | C <sub>43</sub> H <sub>78</sub> NO <sub>8</sub> P | 767.5465 | 768.5543 | 768.5526 | [M+H] <sup>+</sup> | -2.24 | 39.29 | 8.73E+05 |
| PE(39:0)                 | C <sub>44</sub> H <sub>88</sub> NO <sub>8</sub> P | 789.6247 | 790.6325 | 790.6314 | [M+H] <sup>+</sup> | -1.39 | 60.26 | 1.58E+05 |
| PE(39:1)                 | C <sub>44</sub> H <sub>86</sub> NO <sub>8</sub> P | 787.6091 | 788.6169 | 788.6178 | [M+H] <sup>+</sup> | 1.19  | 54.53 | 8.14E+04 |
| PE(39:3)                 | C <sub>44</sub> H <sub>82</sub> NO <sub>8</sub> P | 783.5778 | 784.5856 | 784.5855 | [M+H] <sup>+</sup> | -0.14 | 42.30 | 2.84E+05 |
| PE(39:4)                 | C <sub>44</sub> H <sub>80</sub> NO <sub>8</sub> P | 781.5621 | 782.5700 | 782.5686 | [M+H] <sup>+</sup> | -1.75 | 41.12 | 7.99E+05 |
| PE(40:2)                 | C <sub>45</sub> H <sub>86</sub> NO <sub>8</sub> P | 799.6091 | 800.6169 | 800.6170 | [M+H] <sup>+</sup> | 0.08  | 51.87 | 2.27E+04 |



|          |                                                    |          |          |          |                    |       |       |          |
|----------|----------------------------------------------------|----------|----------|----------|--------------------|-------|-------|----------|
| PE(40:6) | C <sub>45</sub> H <sub>78</sub> NO <sub>8</sub> P  | 791.5465 | 792.5543 | 792.5536 | [M+H] <sup>+</sup> | -0.88 | 27.69 | 1.70E+05 |
| PE(41:3) | C <sub>46</sub> H <sub>86</sub> NO <sub>8</sub> P  | 811.6091 | 812.6169 | 812.6189 | [M+H] <sup>+</sup> | 2.48  | 47.77 | 9.20E+04 |
| PE(41:4) | C <sub>46</sub> H <sub>84</sub> NO <sub>8</sub> P  | 809.5934 | 810.6012 | 810.5993 | [M+H] <sup>+</sup> | -2.40 | 46.58 | 1.61E+06 |
| PE(41:5) | C <sub>46</sub> H <sub>82</sub> NO <sub>8</sub> P  | 807.5778 | 808.5856 | 808.5838 | [M+H] <sup>+</sup> | -2.28 | 44.49 | 1.09E+05 |
| PE(41:6) | C <sub>46</sub> H <sub>80</sub> NO <sub>8</sub> P  | 805.5621 | 806.5700 | 806.5688 | [M+H] <sup>+</sup> | -1.42 | 48.37 | 7.12E+04 |
| PE(42:2) | C <sub>47</sub> H <sub>90</sub> NO <sub>8</sub> P  | 827.6404 | 828.6482 | 828.6447 | [M+H] <sup>+</sup> | -4.23 | 49.71 | 7.88E+04 |
| PE(44:2) | C <sub>49</sub> H <sub>94</sub> NO <sub>8</sub> P  | 855.6717 | 856.6795 | 856.6774 | [M+H] <sup>+</sup> | -2.45 | 54.37 | 1.67E+05 |
| PI(34:1) | C <sub>43</sub> H <sub>81</sub> O <sub>13</sub> P  | 836.5415 | 835.5336 | 835.5402 | [M-H] <sup>-</sup> | 7.84  | 27.31 | 3.32E+05 |
| PI(34:2) | C <sub>43</sub> H <sub>79</sub> O <sub>13</sub> P  | 834.5258 | 833.5180 | 833.5188 | [M-H] <sup>-</sup> | 0.99  | 26.20 | 5.40E+05 |
| PI(35:2) | C <sub>44</sub> H <sub>81</sub> O <sub>13</sub> P  | 848.5415 | 847.5336 | 847.5362 | [M-H] <sup>-</sup> | 2.99  | 28.99 | 3.90E+04 |
| PI(36:1) | C <sub>45</sub> H <sub>85</sub> O <sub>13</sub> P  | 864.5728 | 863.5649 | 863.5725 | [M-H] <sup>-</sup> | 8.72  | 29.54 | 6.74E+04 |
| PI(36:2) | C <sub>45</sub> H <sub>83</sub> O <sub>13</sub> P  | 862.5571 | 861.5493 | 861.5510 | [M-H] <sup>-</sup> | 1.95  | 29.90 | 9.28E+05 |
| PI(36:3) | C <sub>45</sub> H <sub>81</sub> O <sub>13</sub> P  | 860.5415 | 859.5336 | 859.5378 | [M-H] <sup>-</sup> | 4.80  | 27.28 | 2.12E+06 |
| PI(36:4) | C <sub>45</sub> H <sub>79</sub> O <sub>13</sub> P  | 858.5258 | 857.5180 | 857.5182 | [M-H] <sup>-</sup> | 0.23  | 26.20 | 1.42E+06 |
| PI(36:5) | C <sub>45</sub> H <sub>77</sub> O <sub>13</sub> P  | 856.5102 | 855.5023 | 855.5034 | [M-H] <sup>-</sup> | 1.25  | 24.26 | 5.00E+04 |
| PI(37:3) | C <sub>46</sub> H <sub>83</sub> O <sub>13</sub> P  | 874.5571 | 873.5493 | 873.5567 | [M-H] <sup>-</sup> | 8.48  | 28.10 | 3.91E+04 |
| PI(37:4) | C <sub>46</sub> H <sub>81</sub> O <sub>13</sub> P  | 872.5415 | 871.5336 | 871.5362 | [M-H] <sup>-</sup> | 2.90  | 28.34 | 5.07E+05 |
| PI(38:2) | C <sub>47</sub> H <sub>87</sub> O <sub>13</sub> P  | 890.5884 | 889.5806 | 889.5831 | [M-H] <sup>-</sup> | 2.78  | 28.52 | 1.50E+05 |
| PI(38:4) | C <sub>47</sub> H <sub>83</sub> O <sub>13</sub> P  | 886.5571 | 885.5493 | 885.5501 | [M-H] <sup>-</sup> | 0.94  | 27.54 | 9.98E+06 |
| PI(38:5) | C <sub>47</sub> H <sub>81</sub> O <sub>13</sub> P  | 884.5415 | 883.5336 | 883.5338 | [M-H] <sup>-</sup> | 0.20  | 27.28 | 3.75E+06 |
| PI(38:6) | C <sub>47</sub> H <sub>79</sub> O <sub>13</sub> P  | 882.5258 | 881.5180 | 881.5181 | [M-H] <sup>-</sup> | 0.10  | 26.27 | 2.05E+05 |
| PI(40:4) | C <sub>49</sub> H <sub>87</sub> O <sub>13</sub> P  | 914.5884 | 913.5806 | 913.5806 | [M-H] <sup>-</sup> | 0.08  | 31.82 | 2.09E+04 |
| PI(40:5) | C <sub>49</sub> H <sub>85</sub> O <sub>13</sub> P  | 912.5728 | 911.5649 | 911.5669 | [M-H] <sup>-</sup> | 2.17  | 30.20 | 1.74E+05 |
| PI(40:6) | C <sub>49</sub> H <sub>83</sub> O <sub>13</sub> P  | 910.5571 | 909.5493 | 909.5495 | [M-H] <sup>-</sup> | 0.21  | 28.86 | 3.10E+05 |
| PI(40:7) | C <sub>49</sub> H <sub>81</sub> O <sub>13</sub> P  | 908.5415 | 907.5336 | 907.5350 | [M-H] <sup>-</sup> | 1.49  | 26.84 | 3.72E+04 |
| PS(24:0) | C <sub>30</sub> H <sub>58</sub> NO <sub>10</sub> P | 623.3798 | 624.3876 | 624.3855 | [M+H] <sup>+</sup> | -3.44 | 16.82 | 2.06E+05 |
| PS(26:1) | C <sub>32</sub> H <sub>60</sub> NO <sub>10</sub> P | 649.3955 | 650.4033 | 650.4008 | [M+H] <sup>+</sup> | -3.86 | 15.02 | 2.21E+05 |
| PS(27:0) | C <sub>33</sub> H <sub>64</sub> NO <sub>10</sub> P | 665.4268 | 666.4346 | 666.4315 | [M+H] <sup>+</sup> | -4.57 | 15.52 | 1.46E+05 |
| PS(27:1) | C <sub>33</sub> H <sub>62</sub> NO <sub>10</sub> P | 663.4111 | 664.4189 | 664.4165 | [M+H] <sup>+</sup> | -3.73 | 16.91 | 1.44E+05 |
| PS(28:1) | C <sub>34</sub> H <sub>64</sub> NO <sub>10</sub> P | 677.4268 | 678.4346 | 678.4314 | [M+H] <sup>+</sup> | -4.73 | 17.59 | 1.78E+05 |

|           |                                                                 |          |          |          |                    |       |       |          |
|-----------|-----------------------------------------------------------------|----------|----------|----------|--------------------|-------|-------|----------|
| PS(29:0)  | C <sub>35</sub> H <sub>68</sub> NO <sub>10</sub> P              | 693.4581 | 694.4659 | 694.4629 | [M+H] <sup>+</sup> | -4.28 | 17.93 | 1.46E+05 |
| PS(30:2)  | C <sub>36</sub> H <sub>66</sub> NO <sub>10</sub> P              | 703.4424 | 704.4502 | 704.4474 | [M+H] <sup>+</sup> | -4.08 | 18.23 | 1.48E+05 |
| PS(31:0)  | C <sub>37</sub> H <sub>72</sub> NO <sub>10</sub> P              | 721.4894 | 722.4972 | 722.4963 | [M+H] <sup>+</sup> | -1.22 | 21.53 | 1.49E+05 |
| PS(32:1)  | C <sub>38</sub> H <sub>72</sub> NO <sub>10</sub> P              | 733.4894 | 734.4972 | 734.4944 | [M+H] <sup>+</sup> | -3.78 | 19.86 | 5.38E+05 |
| PS(33:1)  | C <sub>39</sub> H <sub>74</sub> NO <sub>10</sub> P              | 747.5050 | 748.5128 | 748.5110 | [M+H] <sup>+</sup> | -2.41 | 21.87 | 2.65E+05 |
| PS(33:3)  | C <sub>39</sub> H <sub>70</sub> NO <sub>10</sub> P              | 743.4737 | 744.4815 | 744.4783 | [M+H] <sup>+</sup> | -4.40 | 20.13 | 2.73E+05 |
| PS(34:1)  | C <sub>40</sub> H <sub>76</sub> NO <sub>10</sub> P              | 761.5207 | 762.5285 | 762.5266 | [M+H] <sup>+</sup> | -2.46 | 22.06 | 1.42E+05 |
| PS(34:2)  | C <sub>40</sub> H <sub>74</sub> NO <sub>10</sub> P              | 759.5050 | 760.5128 | 760.5129 | [M+H] <sup>+</sup> | 0.03  | 27.72 | 2.96E+04 |
| PS(36:1)  | C <sub>42</sub> H <sub>80</sub> NO <sub>10</sub> P              | 789.5520 | 790.5598 | 790.5600 | [M+H] <sup>+</sup> | 0.22  | 24.86 | 7.50E+05 |
| PS(36:2)  | C <sub>42</sub> H <sub>78</sub> NO <sub>10</sub> P              | 787.5363 | 788.5441 | 788.5434 | [M+H] <sup>+</sup> | -0.94 | 22.53 | 4.75E+05 |
| PS(36:4)  | C <sub>42</sub> H <sub>74</sub> NO <sub>10</sub> P              | 783.5050 | 784.5128 | 784.5113 | [M+H] <sup>+</sup> | -1.91 | 21.71 | 1.31E+05 |
| PS(38:2)  | C <sub>44</sub> H <sub>82</sub> NO <sub>10</sub> P              | 815.5676 | 816.5754 | 816.5762 | [M+H] <sup>+</sup> | 0.97  | 25.38 | 2.92E+05 |
| PS(38:3)  | C <sub>44</sub> H <sub>80</sub> NO <sub>10</sub> P              | 813.5520 | 814.5598 | 814.5599 | [M+H] <sup>+</sup> | 0.12  | 23.06 | 1.68E+05 |
| PS(38:5)  | C <sub>44</sub> H <sub>76</sub> NO <sub>10</sub> P              | 809.5207 | 810.5285 | 810.5248 | [M+H] <sup>+</sup> | -4.57 | 22.73 | 1.01E+05 |
| PS(40:3)  | C <sub>46</sub> H <sub>84</sub> NO <sub>10</sub> P              | 841.5833 | 842.5911 | 842.5900 | [M+H] <sup>+</sup> | -1.28 | 28.19 | 1.99E+05 |
| PS(40:4)  | C <sub>46</sub> H <sub>82</sub> NO <sub>10</sub> P              | 839.5676 | 840.5754 | 840.5756 | [M+H] <sup>+</sup> | 0.26  | 25.56 | 1.54E+05 |
| PS(40:5)  | C <sub>46</sub> H <sub>80</sub> NO <sub>10</sub> P              | 837.5520 | 838.5598 | 838.5581 | [M+H] <sup>+</sup> | -2.01 | 22.28 | 1.66E+05 |
| PS(40:8)  | C <sub>46</sub> H <sub>74</sub> NO <sub>10</sub> P              | 831.5050 | 832.5128 | 832.5117 | [M+H] <sup>+</sup> | -1.38 | 25.99 | 5.99E+04 |
| SM(d32:1) | C <sub>37</sub> H <sub>75</sub> N <sub>2</sub> O <sub>6</sub> P | 674.5363 | 675.5441 | 675.5430 | [M+H] <sup>+</sup> | -1.56 | 29.33 | 4.95E+05 |
| SM(d33:1) | C <sub>38</sub> H <sub>77</sub> N <sub>2</sub> O <sub>6</sub> P | 688.5519 | 689.5597 | 689.5578 | [M+H] <sup>+</sup> | -2.81 | 30.23 | 1.07E+06 |
| SM(d34:0) | C <sub>39</sub> H <sub>81</sub> N <sub>2</sub> O <sub>6</sub> P | 704.5832 | 705.5910 | 705.5903 | [M+H] <sup>+</sup> | -1.08 | 34.57 | 2.58E+05 |
| SM(d34:1) | C <sub>39</sub> H <sub>79</sub> N <sub>2</sub> O <sub>6</sub> P | 702.5675 | 703.5754 | 703.5734 | [M+H] <sup>+</sup> | -2.84 | 32.99 | 1.52E+07 |
| SM(d34:2) | C <sub>39</sub> H <sub>77</sub> N <sub>2</sub> O <sub>6</sub> P | 700.5519 | 701.5597 | 701.5588 | [M+H] <sup>+</sup> | -1.38 | 29.31 | 1.37E+07 |
| SM(d36:0) | C <sub>41</sub> H <sub>85</sub> N <sub>2</sub> O <sub>6</sub> P | 732.6145 | 733.6223 | 733.6245 | [M+H] <sup>+</sup> | 3.02  | 75.24 | 4.65E+04 |
| SM(d36:1) | C <sub>41</sub> H <sub>83</sub> N <sub>2</sub> O <sub>6</sub> P | 730.5988 | 731.6067 | 731.6053 | [M+H] <sup>+</sup> | -1.87 | 37.76 | 2.63E+06 |
| SM(d36:2) | C <sub>41</sub> H <sub>81</sub> N <sub>2</sub> O <sub>6</sub> P | 728.5832 | 729.5910 | 729.5891 | [M+H] <sup>+</sup> | -2.64 | 33.05 | 1.02E+06 |
| SM(d36:3) | C <sub>41</sub> H <sub>79</sub> N <sub>2</sub> O <sub>6</sub> P | 726.5675 | 727.5754 | 727.5740 | [M+H] <sup>+</sup> | -1.88 | 29.95 | 2.50E+05 |
| SM(d38:1) | C <sub>43</sub> H <sub>87</sub> N <sub>2</sub> O <sub>6</sub> P | 758.6301 | 759.6380 | 759.6365 | [M+H] <sup>+</sup> | -1.93 | 44.06 | 1.32E+06 |
| SM(d39:1) | C <sub>44</sub> H <sub>89</sub> N <sub>2</sub> O <sub>6</sub> P | 772.6458 | 773.6536 | 773.6531 | [M+H] <sup>+</sup> | -0.66 | 47.46 | 3.04E+05 |
| SM(d39:2) | C <sub>44</sub> H <sub>87</sub> N <sub>2</sub> O <sub>6</sub> P | 770.6301 | 771.6380 | 771.6441 | [M+H] <sup>+</sup> | 8.01  | 20.54 | 1.56E+05 |

|           |             |          |          |          |                                   |       |       |          |
|-----------|-------------|----------|----------|----------|-----------------------------------|-------|-------|----------|
| SM(d40:1) | C45H91N2O6P | 786.6614 | 787.6693 | 787.6701 | [M+H] <sup>+</sup>                | 1.00  | 52.57 | 1.98E+06 |
| SM(d41:1) | C46H93N2O6P | 800.6771 | 801.6849 | 801.6833 | [M+H] <sup>+</sup>                | -2.02 | 44.63 | 5.18E+06 |
| SM(d41:2) | C46H91N2O6P | 798.6614 | 799.6693 | 799.6687 | [M+H] <sup>+</sup>                | -0.69 | 48.57 | 1.24E+06 |
| SM(d42:0) | C47H97N2O6P | 816.7084 | 817.7162 | 817.7094 | [M+H] <sup>+</sup>                | -8.38 | 59.29 | 6.09E+05 |
| SM(d42:1) | C47H95N2O6P | 814.6927 | 815.7006 | 815.6995 | [M+H] <sup>+</sup>                | -1.36 | 55.10 | 2.89E+07 |
| SM(d42:2) | C47H93N2O6P | 812.6771 | 813.6849 | 813.6810 | [M+H] <sup>+</sup>                | -4.86 | 49.16 | 1.25E+07 |
| SM(d42:3) | C47H91N2O6P | 810.6614 | 811.6693 | 811.6670 | [M+H] <sup>+</sup>                | -2.77 | 44.23 | 1.08E+07 |
| SM(d43:1) | C48H97N2O6P | 828.7084 | 829.7162 | 829.7147 | [M+H] <sup>+</sup>                | -1.77 | 56.97 | 1.67E+06 |
| SM(d43:2) | C48H95N2O6P | 826.6927 | 827.7006 | 827.6980 | [M+H] <sup>+</sup>                | -3.12 | 51.60 | 3.88E+05 |
| SM(d44:1) | C49H99N2O6P | 842.7240 | 843.7319 | 843.7302 | [M+H] <sup>+</sup>                | -1.99 | 56.05 | 2.36E+05 |
| SM(d44:2) | C49H97N2O6P | 840.7084 | 841.7162 | 841.7132 | [M+H] <sup>+</sup>                | -3.63 | 53.47 | 4.94E+05 |
| TG(48:0)  | C51H98O6    | 806.7363 | 824.7707 | 824.7685 | [M+NH <sub>4</sub> ] <sup>+</sup> | -2.59 | 67.39 | 6.38E+05 |
| TG(48:1)  | C51H96O6    | 804.7207 | 822.7550 | 822.7513 | [M+NH <sub>4</sub> ] <sup>+</sup> | -4.49 | 65.03 | 6.99E+05 |
| TG(48:3)  | C51H92O6    | 800.6894 | 818.7237 | 818.7205 | [M+NH <sub>4</sub> ] <sup>+</sup> | -3.90 | 61.37 | 2.63E+06 |
| TG(49:0)  | C52H100O6   | 820.7520 | 838.7863 | 838.7849 | [M+NH <sub>4</sub> ] <sup>+</sup> | -1.75 | 67.92 | 1.00E+05 |
| TG(49:1)  | C52H98O6    | 818.7363 | 836.7707 | 836.7685 | [M+NH <sub>4</sub> ] <sup>+</sup> | -2.57 | 65.43 | 2.14E+05 |
| TG(49:2)  | C52H96O6    | 816.7207 | 834.7550 | 834.7529 | [M+NH <sub>4</sub> ] <sup>+</sup> | -2.59 | 64.64 | 8.64E+05 |
| TG(49:3)  | C52H94O6    | 814.7050 | 832.7394 | 832.7374 | [M+NH <sub>4</sub> ] <sup>+</sup> | -2.32 | 62.99 | 4.22E+05 |
| TG(49:4)  | C52H92O6    | 812.6894 | 830.7237 | 830.7217 | [M+NH <sub>4</sub> ] <sup>+</sup> | -2.40 | 61.20 | 4.06E+05 |
| TG(50:0)  | C53H102O6   | 834.7676 | 852.8020 | 852.8009 | [M+NH <sub>4</sub> ] <sup>+</sup> | -1.24 | 69.10 | 1.53E+06 |
| TG(50:1)  | C53H100O6   | 832.7520 | 850.7863 | 850.7844 | [M+NH <sub>4</sub> ] <sup>+</sup> | -2.25 | 66.32 | 5.83E+06 |
| TG(50:2)  | C53H98O6    | 830.7363 | 848.7707 | 848.7684 | [M+NH <sub>4</sub> ] <sup>+</sup> | -2.70 | 64.76 | 8.26E+06 |
| TG(50:3)  | C53H96O6    | 828.7207 | 846.7550 | 846.7531 | [M+NH <sub>4</sub> ] <sup>+</sup> | -2.28 | 63.18 | 1.54E+07 |
| TG(50:4)  | C53H94O6    | 826.7050 | 844.7394 | 844.7371 | [M+NH <sub>4</sub> ] <sup>+</sup> | -2.69 | 62.46 | 9.20E+06 |
| TG(50:5)  | C53H92O6    | 824.6894 | 842.7237 | 842.7214 | [M+NH <sub>4</sub> ] <sup>+</sup> | -2.80 | 60.60 | 6.13E+06 |
| TG(51:0)  | C54H104O6   | 848.7832 | 866.8176 | 866.8175 | [M+NH <sub>4</sub> ] <sup>+</sup> | -0.13 | 69.29 | 5.76E+04 |
| TG(51:1)  | C54H102O6   | 846.7676 | 864.8020 | 864.8001 | [M+NH <sub>4</sub> ] <sup>+</sup> | -2.12 | 66.99 | 6.77E+04 |
| TG(51:2)  | C54H100O6   | 844.7520 | 862.7863 | 862.7858 | [M+NH <sub>4</sub> ] <sup>+</sup> | -0.61 | 65.94 | 1.57E+06 |

|          |                                                 |          |          |          |                                   |       |       |          |
|----------|-------------------------------------------------|----------|----------|----------|-----------------------------------|-------|-------|----------|
| TG(51:3) | C <sub>54</sub> H <sub>98</sub> O <sub>6</sub>  | 842.7363 | 860.7707 | 860.7690 | [M+NH <sub>4</sub> ] <sup>+</sup> | -1.94 | 64.44 | 4.05E+06 |
| TG(51:4) | C <sub>54</sub> H <sub>96</sub> O <sub>6</sub>  | 840.7207 | 858.7550 | 858.7535 | [M+NH <sub>4</sub> ] <sup>+</sup> | -1.82 | 62.92 | 4.30E+06 |
| TG(51:5) | C <sub>54</sub> H <sub>94</sub> O <sub>6</sub>  | 838.7050 | 856.7394 | 856.7366 | [M+NH <sub>4</sub> ] <sup>+</sup> | -3.20 | 61.47 | 1.94E+06 |
| TG(51:6) | C <sub>54</sub> H <sub>92</sub> O <sub>6</sub>  | 836.6894 | 854.7237 | 854.7218 | [M+NH <sub>4</sub> ] <sup>+</sup> | -2.20 | 60.35 | 8.11E+05 |
| TG(52:0) | C <sub>55</sub> H <sub>106</sub> O <sub>6</sub> | 862.7989 | 880.8333 | 880.8326 | [M+NH <sub>4</sub> ] <sup>+</sup> | -0.77 | 69.75 | 1.31E+05 |
| TG(52:1) | C <sub>55</sub> H <sub>104</sub> O <sub>6</sub> | 860.7832 | 878.8176 | 878.8171 | [M+NH <sub>4</sub> ] <sup>+</sup> | -0.57 | 67.73 | 1.34E+06 |
| TG(52:2) | C <sub>55</sub> H <sub>102</sub> O <sub>6</sub> | 858.7676 | 876.8020 | 876.8002 | [M+NH <sub>4</sub> ] <sup>+</sup> | -2.07 | 67.32 | 2.88E+06 |
| TG(52:4) | C <sub>55</sub> H <sub>98</sub> O <sub>6</sub>  | 854.7363 | 872.7707 | 872.7663 | [M+NH <sub>4</sub> ] <sup>+</sup> | -4.96 | 63.07 | 3.23E+07 |
| TG(52:5) | C <sub>55</sub> H <sub>96</sub> O <sub>6</sub>  | 852.7207 | 870.7550 | 870.7530 | [M+NH <sub>4</sub> ] <sup>+</sup> | -2.32 | 62.83 | 4.44E+07 |
| TG(52:6) | C <sub>55</sub> H <sub>94</sub> O <sub>6</sub>  | 850.7050 | 868.7394 | 868.7370 | [M+NH <sub>4</sub> ] <sup>+</sup> | -2.77 | 61.69 | 1.29E+07 |
| TG(52:7) | C <sub>55</sub> H <sub>92</sub> O <sub>6</sub>  | 848.6894 | 866.7237 | 866.7228 | [M+NH <sub>4</sub> ] <sup>+</sup> | -1.05 | 60.25 | 4.13E+06 |
| TG(53:1) | C <sub>56</sub> H <sub>106</sub> O <sub>6</sub> | 874.7989 | 892.8333 | 892.8323 | [M+NH <sub>4</sub> ] <sup>+</sup> | -1.13 | 68.49 | 2.25E+05 |
| TG(53:2) | C <sub>56</sub> H <sub>104</sub> O <sub>6</sub> | 872.7832 | 890.8176 | 890.8157 | [M+NH <sub>4</sub> ] <sup>+</sup> | -2.20 | 67.27 | 5.64E+05 |
| TG(53:3) | C <sub>56</sub> H <sub>102</sub> O <sub>6</sub> | 870.7676 | 888.8020 | 888.7980 | [M+NH <sub>4</sub> ] <sup>+</sup> | -4.46 | 65.42 | 6.29E+05 |
| TG(53:4) | C <sub>56</sub> H <sub>100</sub> O <sub>6</sub> | 868.7520 | 886.7863 | 886.7808 | [M+NH <sub>4</sub> ] <sup>+</sup> | -6.21 | 65.04 | 4.70E+05 |
| TG(53:5) | C <sub>56</sub> H <sub>98</sub> O <sub>6</sub>  | 866.7363 | 884.7707 | 884.7688 | [M+NH <sub>4</sub> ] <sup>+</sup> | -2.17 | 62.90 | 1.52E+06 |
| TG(53:6) | C <sub>56</sub> H <sub>96</sub> O <sub>6</sub>  | 864.7207 | 882.7550 | 882.7527 | [M+NH <sub>4</sub> ] <sup>+</sup> | -2.67 | 62.84 | 8.54E+05 |
| TG(53:7) | C <sub>56</sub> H <sub>94</sub> O <sub>6</sub>  | 862.7050 | 880.7394 | 880.7380 | [M+NH <sub>4</sub> ] <sup>+</sup> | -1.61 | 60.55 | 7.14E+05 |
| TG(53:8) | C <sub>56</sub> H <sub>92</sub> O <sub>6</sub>  | 860.6894 | 878.7237 | 878.7225 | [M+NH <sub>4</sub> ] <sup>+</sup> | -1.43 | 59.48 | 1.88E+05 |
| TG(54:0) | C <sub>57</sub> H <sub>110</sub> O <sub>6</sub> | 890.8302 | 908.8646 | 908.8637 | [M+NH <sub>4</sub> ] <sup>+</sup> | -0.92 | 72.04 | 1.31E+06 |
| TG(54:1) | C <sub>57</sub> H <sub>108</sub> O <sub>6</sub> | 888.8145 | 906.8489 | 906.8477 | [M+NH <sub>4</sub> ] <sup>+</sup> | -1.35 | 69.61 | 8.93E+05 |
| TG(54:2) | C <sub>57</sub> H <sub>106</sub> O <sub>6</sub> | 886.7989 | 904.8333 | 904.8314 | [M+NH <sub>4</sub> ] <sup>+</sup> | -2.09 | 67.88 | 4.47E+06 |
| TG(54:3) | C <sub>57</sub> H <sub>104</sub> O <sub>6</sub> | 884.7832 | 902.8176 | 902.8145 | [M+NH <sub>4</sub> ] <sup>+</sup> | -3.50 | 66.44 | 9.52E+06 |
| TG(54:4) | C <sub>57</sub> H <sub>102</sub> O <sub>6</sub> | 882.7676 | 900.8020 | 900.7973 | [M+NH <sub>4</sub> ] <sup>+</sup> | -5.14 | 64.87 | 3.22E+07 |
| TG(54:5) | C <sub>57</sub> H <sub>100</sub> O <sub>6</sub> | 880.7520 | 898.7863 | 898.7812 | [M+NH <sub>4</sub> ] <sup>+</sup> | -5.73 | 63.68 | 6.21E+07 |
| TG(54:6) | C <sub>57</sub> H <sub>98</sub> O <sub>6</sub>  | 878.7363 | 896.7707 | 896.7668 | [M+NH <sub>4</sub> ] <sup>+</sup> | -4.32 | 63.47 | 2.68E+07 |
| TG(54:7) | C <sub>57</sub> H <sub>96</sub> O <sub>6</sub>  | 876.7207 | 894.7550 | 894.7531 | [M+NH <sub>4</sub> ] <sup>+</sup> | -2.15 | 62.02 | 2.55E+07 |

|           |           |          |          |          |                                   |       |       |          |
|-----------|-----------|----------|----------|----------|-----------------------------------|-------|-------|----------|
| TG(54:9)  | C57H92O6  | 872.6894 | 890.7237 | 890.7233 | [M+NH <sub>4</sub> ] <sup>+</sup> | -0.53 | 58.48 | 1.47E+06 |
| TG(55:0)  | C58H112O6 | 904.8458 | 922.8802 | 922.8791 | [M+NH <sub>4</sub> ] <sup>+</sup> | -1.19 | 68.78 | 3.29E+04 |
| TG(55:10) | C58H92O6  | 884.6894 | 902.7237 | 902.7262 | [M+NH <sub>4</sub> ] <sup>+</sup> | 2.70  | 62.05 | 3.01E+05 |
| TG(55:3)  | C58H106O6 | 898.7989 | 916.8333 | 916.8305 | [M+NH <sub>4</sub> ] <sup>+</sup> | -3.03 | 67.11 | 1.33E+05 |
| TG(55:4)  | C58H104O6 | 896.7832 | 914.8176 | 914.8134 | [M+NH <sub>4</sub> ] <sup>+</sup> | -4.63 | 66.37 | 2.09E+05 |
| TG(55:5)  | C58H102O6 | 894.7676 | 912.8020 | 912.7985 | [M+NH <sub>4</sub> ] <sup>+</sup> | -3.76 | 64.89 | 3.35E+05 |
| TG(55:6)  | C58H100O6 | 892.7520 | 910.7863 | 910.7808 | [M+NH <sub>4</sub> ] <sup>+</sup> | -6.10 | 63.96 | 5.08E+05 |
| TG(55:7)  | C58H98O6  | 890.7363 | 908.7707 | 908.7668 | [M+NH <sub>4</sub> ] <sup>+</sup> | -4.31 | 62.71 | 4.97E+05 |
| TG(55:8)  | C58H96O6  | 888.7207 | 906.7550 | 906.7512 | [M+NH <sub>4</sub> ] <sup>+</sup> | -4.25 | 61.81 | 8.41E+05 |
| TG(55:9)  | C58H94O6  | 886.7050 | 904.7394 | 904.7366 | [M+NH <sub>4</sub> ] <sup>+</sup> | -3.02 | 59.58 | 1.81E+05 |
| TG(56:0)  | C59H114O6 | 918.8615 | 936.8959 | 936.8958 | [M+NH <sub>4</sub> ] <sup>+</sup> | -0.04 | 73.22 | 2.75E+05 |
| TG(56:1)  | C59H112O6 | 916.8458 | 934.8802 | 934.8797 | [M+NH <sub>4</sub> ] <sup>+</sup> | -0.57 | 70.72 | 7.61E+05 |
| TG(56:11) | C59H92O6  | 896.6894 | 914.7237 | 914.7234 | [M+NH <sub>4</sub> ] <sup>+</sup> | -0.36 | 57.88 | 3.49E+05 |
| TG(56:2)  | C59H110O6 | 914.8302 | 932.8646 | 932.8638 | [M+NH <sub>4</sub> ] <sup>+</sup> | -0.85 | 69.32 | 7.19E+05 |
| TG(56:3)  | C59H108O6 | 912.8145 | 930.8489 | 930.8469 | [M+NH <sub>4</sub> ] <sup>+</sup> | -2.16 | 68.31 | 1.15E+06 |
| TG(56:4)  | C59H106O6 | 910.7989 | 928.8333 | 928.8312 | [M+NH <sub>4</sub> ] <sup>+</sup> | -2.26 | 67.56 | 4.69E+05 |
| TG(56:5)  | C59H104O6 | 908.7832 | 926.8176 | 926.8102 | [M+NH <sub>4</sub> ] <sup>+</sup> | -8.02 | 65.36 | 5.49E+06 |
| TG(56:6)  | C59H102O6 | 906.7676 | 924.8020 | 924.7973 | [M+NH <sub>4</sub> ] <sup>+</sup> | -5.02 | 65.54 | 7.74E+06 |
| TG(56:7)  | C59H100O6 | 904.7520 | 922.7863 | 922.7820 | [M+NH <sub>4</sub> ] <sup>+</sup> | -4.70 | 64.58 | 9.36E+06 |
| TG(56:9)  | C59H96O6  | 900.7207 | 918.7550 | 918.7499 | [M+NH <sub>4</sub> ] <sup>+</sup> | -5.56 | 59.79 | 2.18E+06 |
| TG(57:0)  | C60H116O6 | 932.8771 | 950.9115 | 950.9107 | [M+NH <sub>4</sub> ] <sup>+</sup> | -0.90 | 73.99 | 8.29E+04 |
| TG(57:1)  | C60H114O6 | 930.8615 | 948.8959 | 948.8943 | [M+NH <sub>4</sub> ] <sup>+</sup> | -1.60 | 71.21 | 2.83E+05 |
| TG(57:10) | C60H96O6  | 912.7207 | 930.7550 | 930.7518 | [M+NH <sub>4</sub> ] <sup>+</sup> | -3.45 | 60.41 | 2.59E+05 |
| TG(57:2)  | C60H112O6 | 928.8458 | 946.8802 | 946.8760 | [M+NH <sub>4</sub> ] <sup>+</sup> | -4.44 | 66.20 | 3.30E+05 |
| TG(57:3)  | C60H110O6 | 926.8302 | 944.8646 | 944.8595 | [M+NH <sub>4</sub> ] <sup>+</sup> | -5.33 | 65.56 | 5.46E+05 |
| TG(57:4)  | C60H108O6 | 924.8145 | 942.8489 | 942.8442 | [M+NH <sub>4</sub> ] <sup>+</sup> | -5.03 | 64.02 | 9.36E+05 |
| TG(57:5)  | C60H106O6 | 922.7989 | 940.8333 | 940.8289 | [M+NH <sub>4</sub> ] <sup>+</sup> | -4.68 | 61.93 | 4.10E+05 |

|           |                                                 |          |          |          |                                   |       |       |          |
|-----------|-------------------------------------------------|----------|----------|----------|-----------------------------------|-------|-------|----------|
| TG(57:7)  | C <sub>60</sub> H <sub>102</sub> O <sub>6</sub> | 918.7676 | 936.8020 | 936.7966 | [M+NH <sub>4</sub> ] <sup>+</sup> | -5.69 | 64.77 | 1.76E+05 |
| TG(57:8)  | C <sub>60</sub> H <sub>100</sub> O <sub>6</sub> | 916.7520 | 934.7863 | 934.7808 | [M+NH <sub>4</sub> ] <sup>+</sup> | -5.93 | 63.84 | 2.43E+05 |
| TG(57:9)  | C <sub>60</sub> H <sub>98</sub> O <sub>6</sub>  | 914.7363 | 932.7707 | 932.7686 | [M+NH <sub>4</sub> ] <sup>+</sup> | -2.25 | 61.30 | 1.03E+05 |
| TG(58:0)  | C <sub>61</sub> H <sub>118</sub> O <sub>6</sub> | 946.8928 | 964.9272 | 964.9259 | [M+NH <sub>4</sub> ] <sup>+</sup> | -1.33 | 74.36 | 2.34E+05 |
| TG(58:1)  | C <sub>61</sub> H <sub>116</sub> O <sub>6</sub> | 944.8771 | 962.9115 | 962.9122 | [M+NH <sub>4</sub> ] <sup>+</sup> | 0.71  | 72.22 | 1.62E+05 |
| TG(58:10) | C <sub>61</sub> H <sub>98</sub> O <sub>6</sub>  | 926.7363 | 944.7707 | 944.7656 | [M+NH <sub>4</sub> ] <sup>+</sup> | -5.33 | 61.36 | 5.13E+07 |
| TG(58:11) | C <sub>61</sub> H <sub>96</sub> O <sub>6</sub>  | 924.7207 | 942.7550 | 942.7513 | [M+NH <sub>4</sub> ] <sup>+</sup> | -3.99 | 59.23 | 1.39E+06 |
| TG(58:12) | C <sub>61</sub> H <sub>94</sub> O <sub>6</sub>  | 922.7050 | 940.7394 | 940.7370 | [M+NH <sub>4</sub> ] <sup>+</sup> | -2.53 | 58.25 | 1.47E+06 |
| TG(58:13) | C <sub>61</sub> H <sub>92</sub> O <sub>6</sub>  | 920.6894 | 938.7237 | 938.7215 | [M+NH <sub>4</sub> ] <sup>+</sup> | -2.34 | 57.07 | 8.29E+04 |
| TG(58:2)  | C <sub>61</sub> H <sub>114</sub> O <sub>6</sub> | 942.8615 | 960.8959 | 960.8940 | [M+NH <sub>4</sub> ] <sup>+</sup> | -1.97 | 70.91 | 8.57E+05 |
| TG(58:3)  | C <sub>61</sub> H <sub>112</sub> O <sub>6</sub> | 940.8458 | 958.8802 | 958.8784 | [M+NH <sub>4</sub> ] <sup>+</sup> | -1.86 | 69.17 | 9.36E+05 |
| TG(58:4)  | C <sub>61</sub> H <sub>110</sub> O <sub>6</sub> | 938.8302 | 956.8646 | 956.8629 | [M+NH <sub>4</sub> ] <sup>+</sup> | -1.78 | 68.45 | 1.34E+06 |
| TG(58:5)  | C <sub>61</sub> H <sub>108</sub> O <sub>6</sub> | 936.8145 | 954.8489 | 954.8469 | [M+NH <sub>4</sub> ] <sup>+</sup> | -2.09 | 67.56 | 4.55E+05 |
| TG(58:6)  | C <sub>61</sub> H <sub>106</sub> O <sub>6</sub> | 934.7989 | 952.8333 | 952.8287 | [M+NH <sub>4</sub> ] <sup>+</sup> | -4.78 | 66.07 | 2.85E+06 |
| TG(58:7)  | C <sub>61</sub> H <sub>104</sub> O <sub>6</sub> | 932.7832 | 950.8176 | 950.8110 | [M+NH <sub>4</sub> ] <sup>+</sup> | -6.99 | 64.43 | 7.50E+06 |
| TG(58:8)  | C <sub>61</sub> H <sub>102</sub> O <sub>6</sub> | 930.7676 | 948.8020 | 948.7970 | [M+NH <sub>4</sub> ] <sup>+</sup> | -5.28 | 64.59 | 6.51E+06 |
| TG(58:9)  | C <sub>61</sub> H <sub>100</sub> O <sub>6</sub> | 928.7520 | 946.7863 | 946.7815 | [M+NH <sub>4</sub> ] <sup>+</sup> | -5.04 | 63.19 | 1.39E+07 |
| TG(59:0)  | C <sub>62</sub> H <sub>120</sub> O <sub>6</sub> | 960.9084 | 978.9428 | 978.9423 | [M+NH <sub>4</sub> ] <sup>+</sup> | -0.52 | 75.01 | 2.76E+04 |
| TG(59:1)  | C <sub>62</sub> H <sub>118</sub> O <sub>6</sub> | 958.8928 | 976.9272 | 976.9270 | [M+NH <sub>4</sub> ] <sup>+</sup> | -0.19 | 71.92 | 3.98E+04 |
| TG(59:2)  | C <sub>62</sub> H <sub>116</sub> O <sub>6</sub> | 956.8771 | 974.9115 | 974.9108 | [M+NH <sub>4</sub> ] <sup>+</sup> | -0.70 | 70.65 | 1.29E+05 |
| TG(59:3)  | C <sub>62</sub> H <sub>114</sub> O <sub>6</sub> | 954.8615 | 972.8959 | 972.8934 | [M+NH <sub>4</sub> ] <sup>+</sup> | -2.51 | 65.44 | 1.06E+05 |
| TG(59:4)  | C <sub>62</sub> H <sub>112</sub> O <sub>6</sub> | 952.8458 | 970.8802 | 970.8797 | [M+NH <sub>4</sub> ] <sup>+</sup> | -0.53 | 68.60 | 2.28E+05 |
| TG(59:5)  | C <sub>62</sub> H <sub>110</sub> O <sub>6</sub> | 950.8302 | 968.8646 | 968.8601 | [M+NH <sub>4</sub> ] <sup>+</sup> | -4.59 | 63.64 | 3.57E+05 |
| TG(59:6)  | C <sub>62</sub> H <sub>108</sub> O <sub>6</sub> | 948.8145 | 966.8489 | 966.8455 | [M+NH <sub>4</sub> ] <sup>+</sup> | -3.57 | 62.30 | 1.08E+06 |
| TG(59:7)  | C <sub>62</sub> H <sub>106</sub> O <sub>6</sub> | 946.7989 | 964.8333 | 964.8293 | [M+NH <sub>4</sub> ] <sup>+</sup> | -4.11 | 60.61 | 9.60E+05 |
| TG(60:0)  | C <sub>63</sub> H <sub>122</sub> O <sub>6</sub> | 974.9241 | 992.9585 | 992.9576 | [M+NH <sub>4</sub> ] <sup>+</sup> | -0.85 | 74.85 | 6.17E+04 |
| TG(60:1)  | C <sub>63</sub> H <sub>120</sub> O <sub>6</sub> | 972.9084 | 990.9428 | 990.9430 | [M+NH <sub>4</sub> ] <sup>+</sup> | 0.16  | 73.25 | 1.59E+05 |

|           |                                                 |           |           |           |                                   |       |       |          |
|-----------|-------------------------------------------------|-----------|-----------|-----------|-----------------------------------|-------|-------|----------|
| TG(60:10) | C <sub>63</sub> H <sub>102</sub> O <sub>6</sub> | 954.7676  | 972.8020  | 972.7973  | [M+NH <sub>4</sub> ] <sup>+</sup> | -4.78 | 63.02 | 6.25E+06 |
| TG(60:11) | C <sub>63</sub> H <sub>100</sub> O <sub>6</sub> | 952.7520  | 970.7863  | 970.7812  | [M+NH <sub>4</sub> ] <sup>+</sup> | -5.27 | 61.86 | 5.07E+06 |
| TG(60:12) | C <sub>63</sub> H <sub>98</sub> O <sub>6</sub>  | 950.7363  | 968.7707  | 968.7661  | [M+NH <sub>4</sub> ] <sup>+</sup> | -4.74 | 60.59 | 1.40E+07 |
| TG(60:13) | C <sub>63</sub> H <sub>96</sub> O <sub>6</sub>  | 948.7207  | 966.7550  | 966.7518  | [M+NH <sub>4</sub> ] <sup>+</sup> | -3.33 | 60.25 | 3.37E+06 |
| TG(60:2)  | C <sub>63</sub> H <sub>118</sub> O <sub>6</sub> | 970.8928  | 988.9272  | 988.9265  | [M+NH <sub>4</sub> ] <sup>+</sup> | -0.69 | 72.10 | 4.62E+05 |
| TG(60:3)  | C <sub>63</sub> H <sub>116</sub> O <sub>6</sub> | 968.8771  | 986.9115  | 986.9101  | [M+NH <sub>4</sub> ] <sup>+</sup> | -1.47 | 70.17 | 8.06E+05 |
| TG(60:4)  | C <sub>63</sub> H <sub>114</sub> O <sub>6</sub> | 966.8615  | 984.8959  | 984.8947  | [M+NH <sub>4</sub> ] <sup>+</sup> | -1.15 | 69.71 | 5.91E+05 |
| TG(60:5)  | C <sub>63</sub> H <sub>112</sub> O <sub>6</sub> | 964.8458  | 982.8802  | 982.8783  | [M+NH <sub>4</sub> ] <sup>+</sup> | -1.98 | 68.84 | 4.01E+05 |
| TG(60:8)  | C <sub>63</sub> H <sub>106</sub> O <sub>6</sub> | 958.7989  | 976.8333  | 976.8286  | [M+NH <sub>4</sub> ] <sup>+</sup> | -4.83 | 65.65 | 7.70E+05 |
| TG(60:9)  | C <sub>63</sub> H <sub>104</sub> O <sub>6</sub> | 956.7832  | 974.8176  | 974.8133  | [M+NH <sub>4</sub> ] <sup>+</sup> | -4.43 | 64.00 | 1.60E+06 |
| TG(61:1)  | C <sub>64</sub> H <sub>122</sub> O <sub>6</sub> | 986.9241  | 1004.9585 | 1004.9588 | [M+NH <sub>4</sub> ] <sup>+</sup> | 0.34  | 73.42 | 3.18E+04 |
| TG(61:2)  | C <sub>64</sub> H <sub>120</sub> O <sub>6</sub> | 984.9084  | 1002.9428 | 1002.9414 | [M+NH <sub>4</sub> ] <sup>+</sup> | -1.38 | 71.75 | 4.42E+04 |
| TG(61:3)  | C <sub>64</sub> H <sub>118</sub> O <sub>6</sub> | 982.8928  | 1000.9272 | 1000.9263 | [M+NH <sub>4</sub> ] <sup>+</sup> | -0.82 | 70.68 | 8.17E+04 |
| TG(61:4)  | C <sub>64</sub> H <sub>116</sub> O <sub>6</sub> | 980.8771  | 998.9115  | 998.9101  | [M+NH <sub>4</sub> ] <sup>+</sup> | -1.40 | 70.04 | 2.37E+05 |
| TG(61:6)  | C <sub>64</sub> H <sub>112</sub> O <sub>6</sub> | 976.8458  | 994.8802  | 994.8759  | [M+NH <sub>4</sub> ] <sup>+</sup> | -4.38 | 62.14 | 3.00E+05 |
| TG(61:7)  | C <sub>64</sub> H <sub>110</sub> O <sub>6</sub> | 974.8302  | 992.8646  | 992.8604  | [M+NH <sub>4</sub> ] <sup>+</sup> | -4.15 | 63.16 | 1.73E+05 |
| TG(61:8)  | C <sub>64</sub> H <sub>108</sub> O <sub>6</sub> | 972.8145  | 990.8489  | 990.8448  | [M+NH <sub>4</sub> ] <sup>+</sup> | -4.16 | 61.51 | 2.82E+05 |
| TG(61:9)  | C <sub>64</sub> H <sub>106</sub> O <sub>6</sub> | 970.7989  | 988.8333  | 988.8294  | [M+NH <sub>4</sub> ] <sup>+</sup> | -3.89 | 60.38 | 3.02E+05 |
| TG(62:0)  | C <sub>65</sub> H <sub>126</sub> O <sub>6</sub> | 1002.9554 | 1020.9898 | 1020.9915 | [M+NH <sub>4</sub> ] <sup>+</sup> | 1.67  | 79.34 | 2.20E+04 |
| TG(62:1)  | C <sub>65</sub> H <sub>124</sub> O <sub>6</sub> | 1000.9397 | 1018.9741 | 1018.9726 | [M+NH <sub>4</sub> ] <sup>+</sup> | -1.49 | 73.58 | 7.17E+04 |
| TG(62:10) | C <sub>65</sub> H <sub>106</sub> O <sub>6</sub> | 982.7989  | 1000.8333 | 1000.8289 | [M+NH <sub>4</sub> ] <sup>+</sup> | -4.33 | 64.41 | 3.39E+05 |
| TG(62:11) | C <sub>65</sub> H <sub>104</sub> O <sub>6</sub> | 980.7832  | 998.8176  | 998.8142  | [M+NH <sub>4</sub> ] <sup>+</sup> | -3.47 | 62.84 | 2.68E+05 |
| TG(62:12) | C <sub>65</sub> H <sub>102</sub> O <sub>6</sub> | 978.7676  | 996.8020  | 996.7975  | [M+NH <sub>4</sub> ] <sup>+</sup> | -4.44 | 62.62 | 1.25E+06 |
| TG(62:13) | C <sub>65</sub> H <sub>100</sub> O <sub>6</sub> | 976.7520  | 994.7863  | 994.7815  | [M+NH <sub>4</sub> ] <sup>+</sup> | -4.81 | 61.10 | 1.55E+06 |
| TG(62:14) | C <sub>65</sub> H <sub>98</sub> O <sub>6</sub>  | 974.7363  | 992.7707  | 992.7674  | [M+NH <sub>4</sub> ] <sup>+</sup> | -3.25 | 59.84 | 2.34E+06 |
| TG(62:15) | C <sub>65</sub> H <sub>96</sub> O <sub>6</sub>  | 972.7207  | 990.7550  | 990.7513  | [M+NH <sub>4</sub> ] <sup>+</sup> | -3.72 | 59.57 | 5.92E+05 |
| TG(62:2)  | C <sub>65</sub> H <sub>122</sub> O <sub>6</sub> | 998.9241  | 1016.9585 | 1016.9578 | [M+NH <sub>4</sub> ] <sup>+</sup> | -0.66 | 72.31 | 2.69E+05 |

|           |                                                 |           |           |           |                                   |       |       |          |
|-----------|-------------------------------------------------|-----------|-----------|-----------|-----------------------------------|-------|-------|----------|
| TG(62:3)  | C <sub>65</sub> H <sub>120</sub> O <sub>6</sub> | 996.9084  | 1014.9428 | 1014.9412 | [M+NH <sub>4</sub> ] <sup>+</sup> | -1.62 | 71.58 | 4.59E+05 |
| TG(62:5)  | C <sub>65</sub> H <sub>116</sub> O <sub>6</sub> | 992.8771  | 1010.9115 | 1010.9106 | [M+NH <sub>4</sub> ] <sup>+</sup> | -0.92 | 68.90 | 1.51E+05 |
| TG(62:6)  | C <sub>65</sub> H <sub>114</sub> O <sub>6</sub> | 990.8615  | 1008.8959 | 1008.8942 | [M+NH <sub>4</sub> ] <sup>+</sup> | -1.68 | 69.18 | 1.01E+05 |
| TG(62:9)  | C <sub>65</sub> H <sub>108</sub> O <sub>6</sub> | 984.8145  | 1002.8489 | 1002.8448 | [M+NH <sub>4</sub> ] <sup>+</sup> | -4.14 | 65.50 | 1.21E+05 |
| TG(63:10) | C <sub>66</sub> H <sub>108</sub> O <sub>6</sub> | 996.8145  | 1014.8489 | 1014.8437 | [M+NH <sub>4</sub> ] <sup>+</sup> | -5.11 | 61.06 | 1.46E+05 |
| TG(64:1)  | C <sub>67</sub> H <sub>128</sub> O <sub>6</sub> | 1028.9710 | 1047.0054 | 1047.0052 | [M+NH <sub>4</sub> ] <sup>+</sup> | -0.22 | 74.63 | 4.59E+04 |
| TG(64:14) | C <sub>67</sub> H <sub>102</sub> O <sub>6</sub> | 1002.7676 | 1020.8020 | 1020.7992 | [M+NH <sub>4</sub> ] <sup>+</sup> | -2.71 | 61.23 | 2.74E+05 |
| TG(64:15) | C <sub>67</sub> H <sub>100</sub> O <sub>6</sub> | 1000.7520 | 1018.7863 | 1018.7822 | [M+NH <sub>4</sub> ] <sup>+</sup> | -4.04 | 60.70 | 4.40E+05 |
| TG(64:16) | C <sub>67</sub> H <sub>98</sub> O <sub>6</sub>  | 998.7363  | 1016.7707 | 1016.7677 | [M+NH <sub>4</sub> ] <sup>+</sup> | -2.88 | 59.46 | 2.02E+05 |
| TG(64:2)  | C <sub>67</sub> H <sub>126</sub> O <sub>6</sub> | 1026.9554 | 1044.9898 | 1044.9876 | [M+NH <sub>4</sub> ] <sup>+</sup> | -2.09 | 73.50 | 6.23E+04 |
| TG(64:3)  | C <sub>67</sub> H <sub>124</sub> O <sub>6</sub> | 1024.9397 | 1042.9741 | 1042.9732 | [M+NH <sub>4</sub> ] <sup>+</sup> | -0.92 | 71.99 | 2.02E+04 |
| TG(64:4)  | C <sub>67</sub> H <sub>122</sub> O <sub>6</sub> | 1022.9241 | 1040.9585 | 1040.9562 | [M+NH <sub>4</sub> ] <sup>+</sup> | -2.16 | 71.14 | 3.76E+04 |
| TG(66:1)  | C <sub>69</sub> H <sub>132</sub> O <sub>6</sub> | 1057.0023 | 1075.0367 | 1075.0369 | [M+NH <sub>4</sub> ] <sup>+</sup> | 0.16  | 75.74 | 3.16E+04 |
| TG(66:2)  | C <sub>69</sub> H <sub>130</sub> O <sub>6</sub> | 1054.9867 | 1073.0211 | 1073.0197 | [M+NH <sub>4</sub> ] <sup>+</sup> | -1.29 | 74.39 | 7.14E+04 |
| TG(66:3)  | C <sub>69</sub> H <sub>128</sub> O <sub>6</sub> | 1052.9710 | 1071.0054 | 1071.0044 | [M+NH <sub>4</sub> ] <sup>+</sup> | -0.91 | 72.97 | 4.59E+04 |
| TG(66:4)  | C <sub>69</sub> H <sub>126</sub> O <sub>6</sub> | 1050.9554 | 1068.9898 | 1068.9891 | [M+NH <sub>4</sub> ] <sup>+</sup> | -0.65 | 72.14 | 6.95E+04 |
| TG(66:5)  | C <sub>69</sub> H <sub>124</sub> O <sub>6</sub> | 1048.9397 | 1066.9741 | 1066.9716 | [M+NH <sub>4</sub> ] <sup>+</sup> | -2.31 | 71.41 | 1.77E+05 |
