# Supplementary material
Source: PubMed Central journal article supplement (PMC3531553)
Supplement: NIHMS427979-supplement-Table_S7.pdf [file NIHMS427979-supplement-Table_S7.pdf]

Table S7. List of all lipid molecular species identified from human skin tissue using capillary UPLC-MS and the HSS T3 material. The chain length denotes the total number of acyl carbons followed by total double bonds.

| Molecular Species      | Formula                                         | Formula Mass<br>(isotopic) | Expected<br>m/z | Observed<br>m/z | Ion Type                          | Mass Error<br>(ppm) | Retention<br>Time (min) | Ion<br>Intensity |
|------------------------|-------------------------------------------------|----------------------------|-----------------|-----------------|-----------------------------------|---------------------|-------------------------|------------------|
| 16:1 Cholesteryl ester | C <sub>43</sub> H <sub>74</sub> O <sub>2</sub>  | 622.5689                   | 640.6032        | 640.6015        | [M+NH <sub>4</sub> ] <sup>+</sup> | -2.64               | 67.54                   | 7.74E+04         |
| Cer(d36:3)             | C <sub>36</sub> H <sub>67</sub> NO <sub>3</sub> | 561.5121                   | 562.5199        | 562.5169        | [M+NH <sub>4</sub> ] <sup>+</sup> | -5.36               | 47.85                   | 1.12E+05         |
| Cer(d40:1)             | C <sub>40</sub> H <sub>79</sub> NO <sub>3</sub> | 621.6060                   | 622.6138        | 622.6118        | [M+NH <sub>4</sub> ] <sup>+</sup> | -3.16               | 52.18                   | 3.53E+05         |
| Cer(d40:2)             | C <sub>40</sub> H <sub>77</sub> NO <sub>3</sub> | 619.5903                   | 620.5981        | 620.5951        | [M+NH <sub>4</sub> ] <sup>+</sup> | -4.84               | 50.39                   | 1.89E+05         |
| Cer(d42:0)             | C <sub>42</sub> H <sub>85</sub> NO <sub>3</sub> | 651.6529                   | 652.6607        | 652.6596        | [M+NH <sub>4</sub> ] <sup>+</sup> | -1.79               | 56.10                   | 2.39E+05         |
| Cer(d42:1)             | C <sub>42</sub> H <sub>83</sub> NO <sub>3</sub> | 649.6373                   | 650.6451        | 650.6446        | [M+NH <sub>4</sub> ] <sup>+</sup> | -0.76               | 58.14                   | 7.49E+05         |
| Cer(d42:2)             | C <sub>42</sub> H <sub>81</sub> NO <sub>3</sub> | 647.6216                   | 648.6294        | 648.6269        | [M+NH <sub>4</sub> ] <sup>+</sup> | -3.87               | 50.73                   | 5.17E+05         |
| Cer(d44:1)             | C <sub>44</sub> H <sub>87</sub> NO <sub>3</sub> | 677.6686                   | 678.6764        | 678.6745        | [M+NH <sub>4</sub> ] <sup>+</sup> | -2.79               | 58.37                   | 2.06E+06         |
| Cer(d44:2)             | C <sub>44</sub> H <sub>85</sub> NO <sub>3</sub> | 675.6529                   | 676.6607        | 676.6597        | [M+NH <sub>4</sub> ] <sup>+</sup> | -1.59               | 57.14                   | 8.45E+05         |
| Cer(t42:0)             | C <sub>42</sub> H <sub>85</sub> NO <sub>4</sub> | 667.6478                   | 668.6557        | 668.6541        | [M+NH <sub>4</sub> ] <sup>+</sup> | -2.36               | 55.46                   | 2.50E+05         |
| DG(32:0)               | C <sub>35</sub> H <sub>68</sub> O <sub>5</sub>  | 568.5066                   | 586.5410        | 586.5380        | [M+NH <sub>4</sub> ] <sup>+</sup> | -5.11               | 48.61                   | 1.42E+05         |
| DG(34:0)               | C <sub>37</sub> H <sub>72</sub> O <sub>5</sub>  | 596.5379                   | 614.5723        | 614.5710        | [M+NH <sub>4</sub> ] <sup>+</sup> | -2.08               | 53.34                   | 8.21E+04         |
| DG(34:1)               | C <sub>37</sub> H <sub>70</sub> O <sub>5</sub>  | 594.5223                   | 612.5567        | 612.5537        | [M+NH <sub>4</sub> ] <sup>+</sup> | -4.79               | 49.02                   | 2.31E+05         |
| DG(36:0)               | C <sub>39</sub> H <sub>76</sub> O <sub>5</sub>  | 624.5692                   | 642.6036        | 642.6024        | [M+NH <sub>4</sub> ] <sup>+</sup> | -1.84               | 54.68                   | 2.55E+05         |
| DG(36:1)               | C <sub>39</sub> H <sub>74</sub> O <sub>5</sub>  | 622.5536                   | 640.5880        | 640.5841        | [M+NH <sub>4</sub> ] <sup>+</sup> | -5.96               | 50.35                   | 1.01E+05         |
| DG(36:2)               | C <sub>39</sub> H <sub>72</sub> O <sub>5</sub>  | 620.5379                   | 638.5723        | 638.5694        | [M+NH <sub>4</sub> ] <sup>+</sup> | -4.54               | 48.85                   | 4.10E+05         |
| DG(36:3)               | C <sub>39</sub> H <sub>70</sub> O <sub>5</sub>  | 618.5223                   | 636.5567        | 636.5536        | [M+NH <sub>4</sub> ] <sup>+</sup> | -4.77               | 44.69                   | 1.19E+05         |
| DG(36:4)               | C <sub>39</sub> H <sub>68</sub> O <sub>5</sub>  | 616.5066                   | 634.5410        | 634.5398        | [M+NH <sub>4</sub> ] <sup>+</sup> | -1.97               | 43.69                   | 8.38E+04         |
| DG(37:2)               | C <sub>40</sub> H <sub>74</sub> O <sub>5</sub>  | 634.5536                   | 652.5880        | 652.5927        | [M+NH <sub>4</sub> ] <sup>+</sup> | 7.31                | 55.08                   | 1.75E+04         |
| DG(38:0)               | C <sub>41</sub> H <sub>80</sub> O <sub>5</sub>  | 652.6005                   | 670.6349        | 670.6393        | [M+NH <sub>4</sub> ] <sup>+</sup> | 6.48                | 69.26                   | 8.30E+04         |
| DG(38:1)               | C <sub>41</sub> H <sub>78</sub> O <sub>5</sub>  | 650.5849                   | 668.6193        | 668.6175        | [M+NH <sub>4</sub> ] <sup>+</sup> | -2.70               | 56.50                   | 3.54E+04         |
| DG(38:2)               | C <sub>41</sub> H <sub>76</sub> O <sub>5</sub>  | 648.5692                   | 666.6036        | 666.6028        | [M+NH <sub>4</sub> ] <sup>+</sup> | -1.28               | 51.54                   | 3.72E+04         |
| DG(38:4)               | C <sub>41</sub> H <sub>72</sub> O <sub>5</sub>  | 644.5379                   | 662.5723        | 662.5695        | [M+NH <sub>4</sub> ] <sup>+</sup> | -4.22               | 48.54                   | 2.92E+05         |
| DG(40:1)               | C <sub>43</sub> H <sub>82</sub> O <sub>5</sub>  | 678.6162                   | 696.6506        | 696.6487        | [M+NH <sub>4</sub> ] <sup>+</sup> | -2.68               | 57.95                   | 6.84E+04         |

|           |                                                  |          |          |          |                                   |       |       |          |
|-----------|--------------------------------------------------|----------|----------|----------|-----------------------------------|-------|-------|----------|
| DG(42:1)  | C <sub>45</sub> H <sub>86</sub> O <sub>5</sub>   | 706.6475 | 724.6819 | 724.6804 | [M+NH <sub>4</sub> ] <sup>+</sup> | -2.00 | 59.19 | 6.55E+04 |
| FA(14:0)  | C <sub>14</sub> H <sub>28</sub> O <sub>2</sub>   | 228.2089 | 227.2011 | 227.2018 | [M-H] <sup>-</sup>                | 3.07  | 18.95 | 7.56E+05 |
| FA(16:0)  | C <sub>16</sub> H <sub>32</sub> O <sub>2</sub>   | 256.2402 | 255.2324 | 255.2330 | [M-H] <sup>-</sup>                | 2.34  | 22.46 | 1.46E+07 |
| FA(16:1)  | C <sub>16</sub> H <sub>30</sub> O <sub>2</sub>   | 254.2246 | 253.2167 | 253.2175 | [M-H] <sup>-</sup>                | 2.95  | 18.60 | 7.78E+04 |
| FA(17:0)  | C <sub>17</sub> H <sub>34</sub> O <sub>2</sub>   | 270.2559 | 269.2480 | 269.2494 | [M-H] <sup>-</sup>                | 4.92  | 23.94 | 1.89E+06 |
| FA(17:1)  | C <sub>17</sub> H <sub>32</sub> O <sub>2</sub>   | 268.2402 | 267.2324 | 267.2324 | [M-H] <sup>-</sup>                | 0.07  | 22.24 | 6.67E+04 |
| FA(18:0)  | C <sub>18</sub> H <sub>36</sub> O <sub>2</sub>   | 284.2715 | 283.2637 | 283.2641 | [M-H] <sup>-</sup>                | 1.44  | 26.26 | 1.45E+07 |
| FA(18:1)  | C <sub>18</sub> H <sub>34</sub> O <sub>2</sub>   | 282.2559 | 281.2480 | 281.2487 | [M-H] <sup>-</sup>                | 2.34  | 22.85 | 1.61E+06 |
| FA(18:2)  | C <sub>18</sub> H <sub>32</sub> O <sub>2</sub>   | 280.2402 | 279.2324 | 279.2337 | [M-H] <sup>-</sup>                | 4.78  | 17.92 | 5.38E+04 |
| FA(18:3)  | C <sub>18</sub> H <sub>30</sub> O <sub>2</sub>   | 278.2246 | 277.2167 | 277.2182 | [M-H] <sup>-</sup>                | 5.07  | 17.91 | 8.69E+04 |
| FA(19:0)  | C <sub>19</sub> H <sub>38</sub> O <sub>2</sub>   | 298.2872 | 297.2793 | 297.2805 | [M-H] <sup>-</sup>                | 3.99  | 27.98 | 3.85E+05 |
| FA(20:0)  | C <sub>20</sub> H <sub>40</sub> O <sub>2</sub>   | 312.3028 | 311.2950 | 311.2963 | [M-H] <sup>-</sup>                | 4.35  | 29.41 | 3.82E+05 |
| FA(20:1)  | C <sub>20</sub> H <sub>38</sub> O <sub>2</sub>   | 310.2872 | 309.2794 | 309.2796 | [M-H] <sup>-</sup>                | 0.87  | 25.61 | 3.23E+05 |
| FA(20:2)  | C <sub>20</sub> H <sub>36</sub> O <sub>2</sub>   | 308.2715 | 307.2637 | 307.2644 | [M-H] <sup>-</sup>                | 2.21  | 22.99 | 5.74E+04 |
| FA(20:3)  | C <sub>20</sub> H <sub>34</sub> O <sub>2</sub>   | 306.2559 | 305.2481 | 305.2492 | [M-H] <sup>-</sup>                | 3.59  | 21.50 | 6.02E+04 |
| FA(20:4)  | C <sub>20</sub> H <sub>32</sub> O <sub>2</sub>   | 304.2402 | 303.2324 | 303.2334 | [M-H] <sup>-</sup>                | 3.22  | 19.92 | 1.48E+05 |
| FA(20:5)  | C <sub>20</sub> H <sub>30</sub> O <sub>2</sub>   | 302.2246 | 301.2167 | 301.2178 | [M-H] <sup>-</sup>                | 3.37  | 19.94 | 1.39E+05 |
| FA(21:0)  | C <sub>21</sub> H <sub>42</sub> O <sub>2</sub>   | 326.3185 | 325.3106 | 325.3112 | [M-H] <sup>-</sup>                | 1.87  | 26.01 | 2.51E+04 |
| FA(22:0)  | C <sub>22</sub> H <sub>44</sub> O <sub>2</sub>   | 340.3341 | 339.3263 | 339.3276 | [M-H] <sup>-</sup>                | 4.00  | 35.24 | 1.68E+05 |
| FA(22:1)  | C <sub>22</sub> H <sub>42</sub> O <sub>2</sub>   | 338.3185 | 337.3106 | 337.3123 | [M-H] <sup>-</sup>                | 4.94  | 30.16 | 1.45E+05 |
| FA(22:3)  | C <sub>22</sub> H <sub>38</sub> O <sub>2</sub>   | 334.2872 | 333.2793 | 333.2804 | [M-H] <sup>-</sup>                | 3.14  | 24.64 | 5.68E+04 |
| FA(22:4)  | C <sub>22</sub> H <sub>36</sub> O <sub>2</sub>   | 332.2715 | 331.2637 | 331.2641 | [M-H] <sup>-</sup>                | 1.11  | 21.91 | 3.65E+04 |
| FA(22:5)  | C <sub>22</sub> H <sub>34</sub> O <sub>2</sub>   | 330.2559 | 329.2481 | 329.2492 | [M-H] <sup>-</sup>                | 3.42  | 19.97 | 4.92E+04 |
| FA(22:6)  | C <sub>22</sub> H <sub>32</sub> O <sub>2</sub>   | 328.2402 | 327.2324 | 327.2331 | [M-H] <sup>-</sup>                | 2.16  | 18.39 | 6.99E+04 |
| FA(24:0)  | C <sub>24</sub> H <sub>48</sub> O <sub>2</sub>   | 368.3654 | 367.3576 | 367.3588 | [M-H] <sup>-</sup>                | 3.42  | 41.57 | 6.34E+05 |
| FA(24:1)  | C <sub>24</sub> H <sub>46</sub> O <sub>2</sub>   | 366.3497 | 365.3419 | 365.3431 | [M-H] <sup>-</sup>                | 3.41  | 34.11 | 9.50E+05 |
| FA(25:0)  | C <sub>25</sub> H <sub>50</sub> O <sub>2</sub>   | 382.3811 | 381.3732 | 381.3745 | [M-H] <sup>-</sup>                | 3.24  | 44.46 | 3.95E+04 |
| FA(26:0)  | C <sub>26</sub> H <sub>52</sub> O <sub>2</sub>   | 396.3967 | 395.3889 | 395.3900 | [M-H] <sup>-</sup>                | 2.77  | 47.94 | 6.89E+05 |
| FA(26:1)  | C <sub>26</sub> H <sub>50</sub> O <sub>2</sub>   | 394.3811 | 393.3732 | 393.3745 | [M-H] <sup>-</sup>                | 3.17  | 39.37 | 3.58E+05 |
| LPA(14:0) | C <sub>17</sub> H <sub>35</sub> O <sub>7</sub> P | 382.2120 | 381.2042 | 381.2055 | [M-H] <sup>-</sup>                | 3.32  | 10.29 | 1.79E+04 |

|                                       |                                                   |          |          |          |                    |       |       |          |
|---------------------------------------|---------------------------------------------------|----------|----------|----------|--------------------|-------|-------|----------|
| LPA(17:0)                             | C <sub>20</sub> H <sub>41</sub> O <sub>7</sub> P  | 424.2590 | 423.2512 | 423.2524 | [M-H] <sup>-</sup> | 2.99  | 12.72 | 3.38E+04 |
| LPA(18:2)                             | C <sub>21</sub> H <sub>39</sub> O <sub>7</sub> P  | 434.2433 | 433.2355 | 433.2368 | [M-H] <sup>-</sup> | 3.09  | 12.12 | 2.61E+04 |
| LPA(20:4)                             | C <sub>23</sub> H <sub>39</sub> O <sub>7</sub> P  | 458.2433 | 457.2355 | 457.2374 | [M-H] <sup>-</sup> | 4.10  | 11.16 | 3.79E+04 |
| LPC(14:0) or PC(O-14:0)               | C <sub>22</sub> H <sub>46</sub> NO <sub>7</sub> P | 467.3012 | 468.3090 | 468.3090 | [M+H] <sup>+</sup> | 0.11  | 13.30 | 5.39E+05 |
| LPC(16:0)                             | C <sub>24</sub> H <sub>50</sub> NO <sub>7</sub> P | 495.3325 | 496.3403 | 496.3399 | [M+H] <sup>+</sup> | -0.75 | 16.22 | 1.66E+07 |
| LPC(16:1)                             | C <sub>24</sub> H <sub>48</sub> NO <sub>7</sub> P | 493.3168 | 494.3246 | 494.3239 | [M+H] <sup>+</sup> | -1.51 | 13.73 | 1.93E+06 |
| LPC(17:0) or PC(O-17:0)               | C <sub>25</sub> H <sub>52</sub> NO <sub>7</sub> P | 509.3481 | 510.3559 | 510.3555 | [M+H] <sup>+</sup> | -0.97 | 18.07 | 1.44E+05 |
| LPC(17:1)                             | C <sub>25</sub> H <sub>50</sub> NO <sub>7</sub> P | 507.3325 | 508.3403 | 508.3397 | [M+H] <sup>+</sup> | -1.09 | 15.24 | 7.79E+04 |
| LPC(18:0)                             | C <sub>26</sub> H <sub>54</sub> NO <sub>7</sub> P | 523.3638 | 524.3716 | 524.3695 | [M+H] <sup>+</sup> | -3.96 | 19.26 | 2.33E+06 |
| LPC(18:1) or PC(O-18:1) or PC(P-18:0) | C <sub>26</sub> H <sub>52</sub> NO <sub>7</sub> P | 521.3481 | 522.3559 | 522.3556 | [M+H] <sup>+</sup> | -0.62 | 16.09 | 2.39E+06 |
| LPC(18:2)                             | C <sub>26</sub> H <sub>50</sub> NO <sub>7</sub> P | 519.3325 | 520.3403 | 520.3398 | [M+H] <sup>+</sup> | -0.92 | 14.91 | 5.37E+05 |
| LPC(18:3)                             | C <sub>26</sub> H <sub>48</sub> NO <sub>7</sub> P | 517.3168 | 518.3246 | 518.3226 | [M+H] <sup>+</sup> | -3.96 | 13.70 | 1.38E+05 |
| LPC(20:1) or PC(O-20:1) or PC(P-20:0) | C <sub>28</sub> H <sub>56</sub> NO <sub>7</sub> P | 549.3794 | 550.3872 | 550.3864 | [M+H] <sup>+</sup> | -1.55 | 19.58 | 2.98E+05 |
| LPC(20:2)                             | C <sub>28</sub> H <sub>54</sub> NO <sub>7</sub> P | 547.3638 | 548.3716 | 548.3700 | [M+H] <sup>+</sup> | -2.82 | 17.69 | 6.03E+04 |
| LPC(20:3)                             | C <sub>28</sub> H <sub>52</sub> NO <sub>7</sub> P | 545.3481 | 546.3559 | 546.3520 | [M+H] <sup>+</sup> | -7.24 | 16.96 | 2.97E+05 |
| LPC(20:4)                             | C <sub>28</sub> H <sub>50</sub> NO <sub>7</sub> P | 543.3325 | 544.3403 | 544.3395 | [M+H] <sup>+</sup> | -1.47 | 14.36 | 2.05E+06 |
| LPC(22:6)                             | C <sub>30</sub> H <sub>50</sub> NO <sub>7</sub> P | 567.3325 | 568.3403 | 568.3395 | [M+H] <sup>+</sup> | -1.38 | 12.97 | 2.56E+05 |
| LPC(O-17:0) or PC(O-16:0/O-1:0)       | C <sub>25</sub> H <sub>54</sub> NO <sub>6</sub> P | 495.3689 | 496.3767 | 496.3757 | [M+H] <sup>+</sup> | -1.94 | 12.80 | 4.14E+04 |
| LPC(O-18:1) or LPC(P-18:0)            | C <sub>26</sub> H <sub>54</sub> NO <sub>6</sub> P | 507.3689 | 508.3767 | 508.3758 | [M+H] <sup>+</sup> | -1.70 | 17.96 | 1.00E+05 |
| LPC(P-18:1)                           | C <sub>26</sub> H <sub>52</sub> NO <sub>6</sub> P | 505.3532 | 506.3610 | 506.3593 | [M+H] <sup>+</sup> | -3.36 | 17.71 | 1.21E+05 |
| LPE(16:0)                             | C <sub>21</sub> H <sub>44</sub> NO <sub>7</sub> P | 453.2855 | 454.2933 | 454.2930 | [M+H] <sup>+</sup> | -0.79 | 16.69 | 5.97E+05 |
| LPE(16:1)                             | C <sub>21</sub> H <sub>42</sub> NO <sub>7</sub> P | 451.2699 | 452.2777 | 452.2768 | [M+H] <sup>+</sup> | -2.09 | 14.11 | 8.88E+04 |
| LPE(18:0)                             | C <sub>23</sub> H <sub>48</sub> NO <sub>7</sub> P | 481.3168 | 482.3246 | 482.3239 | [M+H] <sup>+</sup> | -1.61 | 19.27 | 6.05E+05 |
| LPE(18:1)                             | C <sub>23</sub> H <sub>46</sub> NO <sub>7</sub> P | 479.3012 | 480.3090 | 480.3069 | [M+H] <sup>+</sup> | -4.46 | 17.47 | 4.08E+05 |
| LPE(18:2)                             | C <sub>23</sub> H <sub>44</sub> NO <sub>7</sub> P | 477.2855 | 478.2933 | 478.2923 | [M+H] <sup>+</sup> | -2.27 | 14.75 | 7.78E+04 |
| LPE(20:1)                             | C <sub>25</sub> H <sub>50</sub> NO <sub>7</sub> P | 507.3325 | 508.3403 | 508.3404 | [M+H] <sup>+</sup> | 0.25  | 19.93 | 6.70E+04 |
| LPE(20:3)                             | C <sub>25</sub> H <sub>46</sub> NO <sub>7</sub> P | 503.3012 | 504.3090 | 504.3084 | [M+H] <sup>+</sup> | -1.12 | 15.74 | 4.68E+04 |
| LPE(22:6)                             | C <sub>27</sub> H <sub>44</sub> NO <sub>7</sub> P | 525.2855 | 526.2933 | 526.2929 | [M+H] <sup>+</sup> | -0.76 | 14.00 | 1.12E+05 |
| LPG(18:1)                             | C <sub>24</sub> H <sub>47</sub> O <sub>9</sub> P  | 510.2958 | 509.2879 | 509.2900 | [M-H] <sup>-</sup> | 4.15  | 14.16 | 2.53E+04 |
| LPG(20:4)                             | C <sub>26</sub> H <sub>45</sub> O <sub>9</sub> P  | 532.2801 | 531.2723 | 531.2741 | [M-H] <sup>-</sup> | 3.42  | 12.56 | 1.89E+04 |

|           |                                                   |          |          |          |                    |       |       |          |
|-----------|---------------------------------------------------|----------|----------|----------|--------------------|-------|-------|----------|
| LPI(18:0) | C <sub>27</sub> H <sub>53</sub> O <sub>12</sub> P | 600.3275 | 599.3196 | 599.3218 | [M-H] <sup>-</sup> | 3.70  | 15.76 | 3.61E+04 |
| LPI(20:3) | C <sub>29</sub> H <sub>51</sub> O <sub>12</sub> P | 622.3118 | 621.3040 | 621.3063 | [M-H] <sup>-</sup> | 3.66  | 13.64 | 1.23E+04 |
| LPI(20:4) | C <sub>29</sub> H <sub>49</sub> O <sub>12</sub> P | 620.2962 | 619.2883 | 619.2901 | [M-H] <sup>-</sup> | 2.92  | 11.66 | 2.92E+04 |
| LPS(18:0) | C <sub>24</sub> H <sub>48</sub> NO <sub>9</sub> P | 525.3067 | 526.3145 | 526.3143 | [M+H] <sup>+</sup> | -0.24 | 15.32 | 7.86E+04 |
| LPS(20:3) | C <sub>26</sub> H <sub>46</sub> NO <sub>9</sub> P | 547.2910 | 548.2988 | 548.2989 | [M+H] <sup>+</sup> | 0.12  | 13.39 | 1.90E+04 |
| LPS(20:4) | C <sub>26</sub> H <sub>44</sub> NO <sub>9</sub> P | 545.2754 | 546.2832 | 546.2829 | [M+H] <sup>+</sup> | -0.55 | 12.43 | 1.14E+05 |
| PC(28:0)  | C <sub>36</sub> H <sub>72</sub> NO <sub>8</sub> P | 677.4995 | 678.5074 | 678.5052 | [M+H] <sup>+</sup> | -3.12 | 29.15 | 4.77E+06 |
| PC(29:0)  | C <sub>37</sub> H <sub>74</sub> NO <sub>8</sub> P | 691.5152 | 692.5230 | 692.5216 | [M+H] <sup>+</sup> | -2.10 | 30.58 | 1.13E+06 |
| PC(29:1)  | C <sub>37</sub> H <sub>72</sub> NO <sub>8</sub> P | 689.4995 | 690.5074 | 690.5064 | [M+H] <sup>+</sup> | -1.37 | 30.52 | 3.88E+04 |
| PC(30:0)  | C <sub>38</sub> H <sub>76</sub> NO <sub>8</sub> P | 705.5308 | 706.5387 | 706.5356 | [M+H] <sup>+</sup> | -4.26 | 32.85 | 2.38E+07 |
| PC(30:1)  | C <sub>38</sub> H <sub>74</sub> NO <sub>8</sub> P | 703.5152 | 704.5230 | 704.5218 | [M+H] <sup>+</sup> | -1.68 | 27.67 | 1.23E+06 |
| PC(31:0)  | C <sub>39</sub> H <sub>78</sub> NO <sub>8</sub> P | 719.5465 | 720.5543 | 720.5526 | [M+H] <sup>+</sup> | -2.32 | 33.64 | 2.76E+06 |
| PC(31:2)  | C <sub>39</sub> H <sub>74</sub> NO <sub>8</sub> P | 715.5152 | 716.5230 | 716.5212 | [M+H] <sup>+</sup> | -2.56 | 33.23 | 2.23E+05 |
| PC(32:0)  | C <sub>40</sub> H <sub>80</sub> NO <sub>8</sub> P | 733.5621 | 734.5700 | 734.5677 | [M+H] <sup>+</sup> | -3.10 | 38.57 | 3.08E+07 |
| PC(32:1)  | C <sub>40</sub> H <sub>78</sub> NO <sub>8</sub> P | 731.5465 | 732.5543 | 732.5521 | [M+H] <sup>+</sup> | -2.99 | 33.34 | 4.64E+07 |
| PC(32:2)  | C <sub>40</sub> H <sub>76</sub> NO <sub>8</sub> P | 729.5308 | 730.5387 | 730.5366 | [M+H] <sup>+</sup> | -2.85 | 30.89 | 7.72E+06 |
| PC(32:3)  | C <sub>40</sub> H <sub>74</sub> NO <sub>8</sub> P | 727.5152 | 728.5230 | 728.5199 | [M+H] <sup>+</sup> | -4.20 | 28.83 | 1.18E+06 |
| PC(33:0)  | C <sub>41</sub> H <sub>82</sub> NO <sub>8</sub> P | 747.5778 | 748.5856 | 748.5824 | [M+H] <sup>+</sup> | -4.27 | 39.23 | 3.99E+05 |
| PC(33:3)  | C <sub>41</sub> H <sub>76</sub> NO <sub>8</sub> P | 741.5308 | 742.5387 | 742.5374 | [M+H] <sup>+</sup> | -1.69 | 34.54 | 2.51E+05 |
| PC(33:4)  | C <sub>41</sub> H <sub>74</sub> NO <sub>8</sub> P | 739.5152 | 740.5230 | 740.5197 | [M+H] <sup>+</sup> | -4.40 | 34.50 | 1.49E+06 |
| PC(33:5)  | C <sub>41</sub> H <sub>72</sub> NO <sub>8</sub> P | 737.4995 | 738.5074 | 738.5042 | [M+H] <sup>+</sup> | -4.27 | 31.03 | 2.09E+05 |
| PC(34:0)  | C <sub>42</sub> H <sub>84</sub> NO <sub>8</sub> P | 761.5934 | 762.6012 | 762.5988 | [M+H] <sup>+</sup> | -3.24 | 45.55 | 6.05E+06 |
| PC(34:1)  | C <sub>42</sub> H <sub>82</sub> NO <sub>8</sub> P | 759.5778 | 760.5856 | 760.5814 | [M+H] <sup>+</sup> | -5.52 | 32.84 | 5.38E+07 |
| PC(34:2)  | C <sub>42</sub> H <sub>80</sub> NO <sub>8</sub> P | 757.5621 | 758.5700 | 758.5673 | [M+H] <sup>+</sup> | -3.52 | 33.35 | 4.44E+07 |
| PC(34:3)  | C <sub>42</sub> H <sub>78</sub> NO <sub>8</sub> P | 755.5465 | 756.5543 | 756.5518 | [M+H] <sup>+</sup> | -3.32 | 29.57 | 1.68E+06 |
| PC(34:4)  | C <sub>42</sub> H <sub>76</sub> NO <sub>8</sub> P | 753.5308 | 754.5387 | 754.5367 | [M+H] <sup>+</sup> | -2.62 | 30.02 | 1.47E+06 |
| PC(35:1)  | C <sub>43</sub> H <sub>84</sub> NO <sub>8</sub> P | 773.5934 | 774.6012 | 774.5980 | [M+H] <sup>+</sup> | -4.23 | 40.66 | 1.12E+06 |
| PC(35:2)  | C <sub>43</sub> H <sub>82</sub> NO <sub>8</sub> P | 771.5778 | 772.5856 | 772.5823 | [M+H] <sup>+</sup> | -4.30 | 32.14 | 8.35E+05 |
| PC(35:3)  | C <sub>43</sub> H <sub>80</sub> NO <sub>8</sub> P | 769.5621 | 770.5700 | 770.5667 | [M+H] <sup>+</sup> | -4.18 | 34.73 | 3.07E+05 |
| PC(35:4)  | C <sub>43</sub> H <sub>78</sub> NO <sub>8</sub> P | 767.5465 | 768.5543 | 768.5508 | [M+H] <sup>+</sup> | -4.58 | 37.51 | 9.32E+05 |

|           |            |          |          |          |                    |       |       |          |
|-----------|------------|----------|----------|----------|--------------------|-------|-------|----------|
| PC(35:5)  | C43H76NO8P | 765.5308 | 766.5387 | 766.5350 | [M+H] <sup>+</sup> | -4.83 | 35.08 | 1.53E+06 |
| PC(35:6)  | C43H74NO8P | 763.5152 | 764.5230 | 764.5202 | [M+H] <sup>+</sup> | -3.67 | 31.55 | 1.71E+05 |
| PC(36:0)  | C44H88NO8P | 789.6247 | 790.6325 | 790.6382 | [M+H] <sup>+</sup> | 7.17  | 46.85 | 3.58E+04 |
| PC(36:1)  | C44H86NO8P | 787.6091 | 788.6169 | 788.6134 | [M+H] <sup>+</sup> | -4.42 | 46.09 | 1.99E+07 |
| PC(36:2)  | C44H84NO8P | 785.5934 | 786.6012 | 786.5970 | [M+H] <sup>+</sup> | -5.44 | 38.21 | 4.19E+07 |
| PC(36:3)  | C44H82NO8P | 783.5778 | 784.5856 | 784.5801 | [M+H] <sup>+</sup> | -7.05 | 34.39 | 2.39E+07 |
| PC(36:4)  | C44H80NO8P | 781.5621 | 782.5700 | 782.5670 | [M+H] <sup>+</sup> | -3.77 | 33.63 | 5.56E+07 |
| PC(36:5)  | C44H78NO8P | 779.5465 | 780.5543 | 780.5512 | [M+H] <sup>+</sup> | -3.99 | 30.18 | 3.20E+06 |
| PC(36:6)  | C44H76NO8P | 777.5308 | 778.5387 | 778.5367 | [M+H] <sup>+</sup> | -2.50 | 28.46 | 2.87E+05 |
| PC(37:1)  | C45H88NO8P | 801.6247 | 802.6325 | 802.6297 | [M+H] <sup>+</sup> | -3.53 | 47.65 | 1.76E+05 |
| PC(37:2)  | C45H86NO8P | 799.6091 | 800.6169 | 800.6137 | [M+H] <sup>+</sup> | -3.99 | 40.42 | 1.63E+05 |
| PC(37:3)  | C45H84NO8P | 797.5934 | 798.6012 | 798.5968 | [M+H] <sup>+</sup> | -5.54 | 38.23 | 2.43E+05 |
| PC(37:4)  | C45H82NO8P | 795.5778 | 796.5856 | 796.5835 | [M+H] <sup>+</sup> | -2.63 | 43.72 | 9.37E+05 |
| PC(37:5)  | C45H80NO8P | 793.5621 | 794.5700 | 794.5666 | [M+H] <sup>+</sup> | -4.22 | 32.81 | 2.25E+05 |
| PC(38:1)  | C46H90NO8P | 815.6404 | 816.6482 | 816.6443 | [M+H] <sup>+</sup> | -4.78 | 50.42 | 1.78E+05 |
| PC(38:2)  | C46H88NO8P | 813.6247 | 814.6325 | 814.6294 | [M+H] <sup>+</sup> | -3.91 | 38.91 | 1.39E+06 |
| PC(38:3)  | C46H86NO8P | 811.6091 | 812.6169 | 812.6146 | [M+H] <sup>+</sup> | -2.81 | 36.03 | 3.37E+06 |
| PC(38:4)  | C46H84NO8P | 809.5934 | 810.6012 | 810.5977 | [M+H] <sup>+</sup> | -4.36 | 36.02 | 2.08E+07 |
| PC(38:5)  | C46H82NO8P | 807.5778 | 808.5856 | 808.5814 | [M+H] <sup>+</sup> | -5.14 | 34.30 | 2.75E+07 |
| PC(38:6)  | C46H80NO8P | 805.5621 | 806.5700 | 806.5671 | [M+H] <sup>+</sup> | -3.55 | 31.06 | 3.02E+06 |
| PC(40:2)  | C48H92NO8P | 841.6560 | 842.6638 | 842.6614 | [M+H] <sup>+</sup> | -2.94 | 47.33 | 2.54E+05 |
| PC(40:3)  | C48H90NO8P | 839.6404 | 840.6482 | 840.6467 | [M+H] <sup>+</sup> | -1.76 | 41.60 | 3.31E+05 |
| PC(40:4)  | C48H88NO8P | 837.6247 | 838.6325 | 838.6287 | [M+H] <sup>+</sup> | -4.60 | 36.91 | 1.87E+06 |
| PC(40:5)  | C48H86NO8P | 835.6091 | 836.6169 | 836.6124 | [M+H] <sup>+</sup> | -5.36 | 37.27 | 2.84E+06 |
| PC(40:6)  | C48H84NO8P | 833.5934 | 834.6012 | 834.5967 | [M+H] <sup>+</sup> | -5.48 | 34.68 | 3.44E+06 |
| PC(40:7)  | C48H82NO8P | 831.5778 | 832.5856 | 832.5815 | [M+H] <sup>+</sup> | -4.95 | 33.49 | 8.23E+05 |
| PC(40:8)  | C48H80NO8P | 829.5621 | 830.5700 | 830.5668 | [M+H] <sup>+</sup> | -3.82 | 29.98 | 1.71E+05 |
| PC(41:3)  | C49H92NO8P | 853.6560 | 854.6638 | 854.6609 | [M+H] <sup>+</sup> | -3.50 | 23.96 | 2.20E+05 |
| PC(42:10) | C50H80NO8P | 853.5621 | 854.5700 | 854.5635 | [M+H] <sup>+</sup> | -7.54 | 27.18 | 7.95E+04 |
| PC(42:11) | C50H78NO8P | 851.5465 | 852.5543 | 852.5595 | [M+H] <sup>+</sup> | 6.15  | 27.26 | 4.20E+05 |

|                          |                                                   |          |          |          |                    |       |       |          |
|--------------------------|---------------------------------------------------|----------|----------|----------|--------------------|-------|-------|----------|
| PC(42:2)                 | C <sub>50</sub> H <sub>96</sub> NO <sub>8</sub> P | 869.6873 | 870.6951 | 870.6936 | [M+H] <sup>+</sup> | -1.76 | 52.95 | 1.21E+05 |
| PC(42:3)                 | C <sub>50</sub> H <sub>94</sub> NO <sub>8</sub> P | 867.6717 | 868.6795 | 868.6778 | [M+H] <sup>+</sup> | -1.96 | 47.26 | 6.31E+04 |
| PC(42:4)                 | C <sub>50</sub> H <sub>92</sub> NO <sub>8</sub> P | 865.6560 | 866.6638 | 866.6608 | [M+H] <sup>+</sup> | -3.53 | 48.15 | 2.00E+05 |
| PC(42:5)                 | C <sub>50</sub> H <sub>90</sub> NO <sub>8</sub> P | 863.6404 | 864.6482 | 864.6444 | [M+H] <sup>+</sup> | -4.37 | 38.64 | 2.00E+05 |
| PC(42:6)                 | C <sub>50</sub> H <sub>88</sub> NO <sub>8</sub> P | 861.6247 | 862.6325 | 862.6284 | [M+H] <sup>+</sup> | -4.80 | 38.69 | 3.30E+05 |
| PC(42:7)                 | C <sub>50</sub> H <sub>86</sub> NO <sub>8</sub> P | 859.6091 | 860.6169 | 860.6126 | [M+H] <sup>+</sup> | -4.93 | 36.40 | 4.16E+05 |
| PC(42:8)                 | C <sub>50</sub> H <sub>84</sub> NO <sub>8</sub> P | 857.5934 | 858.6012 | 858.5971 | [M+H] <sup>+</sup> | -4.88 | 33.74 | 4.81E+05 |
| PC(44:12)                | C <sub>52</sub> H <sub>80</sub> NO <sub>8</sub> P | 877.5621 | 878.5700 | 878.5743 | [M+H] <sup>+</sup> | 4.92  | 28.05 | 2.07E+05 |
| PC(44:8)                 | C <sub>52</sub> H <sub>88</sub> NO <sub>8</sub> P | 885.6247 | 886.6325 | 886.6289 | [M+H] <sup>+</sup> | -4.14 | 36.60 | 3.80E+05 |
| PC(O-16:0)               | C <sub>24</sub> H <sub>50</sub> NO <sub>7</sub> P | 495.3325 | 496.3403 | 496.3395 | [M+H] <sup>+</sup> | -1.62 | 13.78 | 1.47E+06 |
| PC(O-18:0)               | C <sub>26</sub> H <sub>54</sub> NO <sub>7</sub> P | 523.3638 | 524.3716 | 524.3695 | [M+H] <sup>+</sup> | -3.96 | 17.11 | 2.33E+06 |
| PC(O-30:0)               | C <sub>38</sub> H <sub>78</sub> NO <sub>7</sub> P | 691.5516 | 692.5594 | 692.5572 | [M+H] <sup>+</sup> | -3.11 | 36.61 | 4.00E+05 |
| PC(O-30:1) or PC(P-30:0) | C <sub>38</sub> H <sub>76</sub> NO <sub>7</sub> P | 689.5359 | 690.5437 | 690.5400 | [M+H] <sup>+</sup> | -5.40 | 35.50 | 4.17E+05 |
| PC(O-32:1) or PC(P-32:0) | C <sub>40</sub> H <sub>80</sub> NO <sub>7</sub> P | 717.5672 | 718.5750 | 718.5736 | [M+H] <sup>+</sup> | -2.05 | 42.06 | 2.14E+06 |
| PC(O-32:2) or PC(P-32:1) | C <sub>40</sub> H <sub>78</sub> NO <sub>7</sub> P | 715.5516 | 716.5594 | 716.5571 | [M+H] <sup>+</sup> | -3.15 | 36.81 | 4.84E+05 |
| PC(O-34:2) or PC(P-34:1) | C <sub>42</sub> H <sub>82</sub> NO <sub>7</sub> P | 743.5829 | 744.5907 | 744.5875 | [M+H] <sup>+</sup> | -4.29 | 39.47 | 7.41E+05 |
| PC(O-36:2) or PC(P-36:1) | C <sub>44</sub> H <sub>86</sub> NO <sub>7</sub> P | 771.6142 | 772.6220 | 772.6194 | [M+H] <sup>+</sup> | -3.29 | 41.13 | 2.71E+05 |
| PC(O-36:4) or PC(P-36:3) | C <sub>44</sub> H <sub>82</sub> NO <sub>7</sub> P | 767.5829 | 768.5907 | 768.5892 | [M+H] <sup>+</sup> | -1.93 | 34.41 | 9.47E+05 |
| PC(O-36:5) or PC(P-36:4) | C <sub>44</sub> H <sub>80</sub> NO <sub>7</sub> P | 765.5672 | 766.5750 | 766.5721 | [M+H] <sup>+</sup> | -3.82 | 43.38 | 9.66E+04 |
| PC(O-38:5) or PC(P-38:4) | C <sub>46</sub> H <sub>84</sub> NO <sub>7</sub> P | 793.5985 | 794.6063 | 794.6026 | [M+H] <sup>+</sup> | -4.70 | 36.96 | 2.88E+06 |
| PC(O-38:6) or PC(P-38:5) | C <sub>46</sub> H <sub>82</sub> NO <sub>7</sub> P | 791.5829 | 792.5907 | 792.5872 | [M+H] <sup>+</sup> | -4.45 | 36.46 | 8.65E+06 |
| PC(O-40:5) or PC(P-40:4) | C <sub>48</sub> H <sub>88</sub> NO <sub>7</sub> P | 821.6298 | 822.6376 | 822.6338 | [M+H] <sup>+</sup> | -4.68 | 41.88 | 2.23E+05 |
| PC(O-40:6) or PC(P-40:5) | C <sub>48</sub> H <sub>86</sub> NO <sub>7</sub> P | 819.6142 | 820.6220 | 820.6183 | [M+H] <sup>+</sup> | -4.49 | 40.24 | 2.89E+05 |
| PC(P-34:4)               | C <sub>42</sub> H <sub>76</sub> NO <sub>7</sub> P | 737.5359 | 738.5437 | 738.5406 | [M+H] <sup>+</sup> | -4.27 | 40.41 | 2.51E+05 |
| PC(P-35:2)               | C <sub>43</sub> H <sub>82</sub> NO <sub>7</sub> P | 755.5829 | 756.5907 | 756.5885 | [M+H] <sup>+</sup> | -2.91 | 47.35 | 1.63E+05 |
| PC(P-40:6)               | C <sub>48</sub> H <sub>84</sub> NO <sub>7</sub> P | 817.5985 | 818.6063 | 818.6032 | [M+H] <sup>+</sup> | -3.86 | 35.80 | 2.32E+05 |
| PE(34:0)                 | C <sub>39</sub> H <sub>78</sub> NO <sub>8</sub> P | 719.5465 | 720.5543 | 720.5538 | [M+H] <sup>+</sup> | -0.66 | 39.88 | 2.63E+05 |
| PE(34:1)                 | C <sub>39</sub> H <sub>76</sub> NO <sub>8</sub> P | 717.5308 | 718.5387 | 718.5364 | [M+H] <sup>+</sup> | -3.09 | 40.03 | 3.32E+05 |
| PE(34:2)                 | C <sub>39</sub> H <sub>74</sub> NO <sub>8</sub> P | 715.5152 | 716.5230 | 716.5212 | [M+H] <sup>+</sup> | -2.56 | 33.23 | 2.23E+05 |
| PE(35:0)                 | C <sub>40</sub> H <sub>80</sub> NO <sub>8</sub> P | 733.5621 | 734.5700 | 734.5671 | [M+H] <sup>+</sup> | -3.85 | 49.26 | 4.39E+05 |
| PE(35:1)                 | C <sub>40</sub> H <sub>78</sub> NO <sub>8</sub> P | 731.5465 | 732.5543 | 732.5517 | [M+H] <sup>+</sup> | -3.55 | 41.09 | 4.97E+05 |
| PE(36:0)                 | C <sub>41</sub> H <sub>82</sub> NO <sub>8</sub> P | 747.5778 | 748.5856 | 748.5824 | [M+H] <sup>+</sup> | -4.27 | 39.23 | 3.99E+05 |

|          |            |          |          |          |                    |       |       |          |
|----------|------------|----------|----------|----------|--------------------|-------|-------|----------|
| PE(36:1) | C41H80NO8P | 745.5621 | 746.5700 | 746.5675 | [M+H] <sup>+</sup> | -3.29 | 33.49 | 1.29E+06 |
| PE(36:2) | C41H78NO8P | 743.5465 | 744.5543 | 744.5518 | [M+H] <sup>+</sup> | -3.43 | 40.51 | 7.94E+05 |
| PE(36:3) | C41H76NO8P | 741.5308 | 742.5387 | 742.5374 | [M+H] <sup>+</sup> | -1.69 | 34.54 | 2.51E+05 |
| PE(36:4) | C41H74NO8P | 739.5152 | 740.5230 | 740.5197 | [M+H] <sup>+</sup> | -4.40 | 34.50 | 1.49E+06 |
| PE(36:5) | C41H72NO8P | 737.4995 | 738.5074 | 738.5042 | [M+H] <sup>+</sup> | -4.27 | 31.03 | 2.09E+05 |
| PE(37:1) | C42H82NO8P | 759.5778 | 760.5856 | 760.5828 | [M+H] <sup>+</sup> | -3.68 | 42.25 | 3.91E+06 |
| PE(37:3) | C42H78NO8P | 755.5465 | 756.5543 | 756.5552 | [M+H] <sup>+</sup> | 1.24  | 27.58 | 6.83E+04 |
| PE(38:1) | C43H84NO8P | 773.5934 | 774.6012 | 774.5980 | [M+H] <sup>+</sup> | -4.23 | 40.66 | 1.12E+06 |
| PE(38:3) | C43H80NO8P | 769.5621 | 770.5700 | 770.5667 | [M+H] <sup>+</sup> | -4.18 | 34.73 | 3.07E+05 |
| PE(38:4) | C43H78NO8P | 767.5465 | 768.5543 | 768.5508 | [M+H] <sup>+</sup> | -4.58 | 37.51 | 9.32E+05 |
| PE(38:5) | C43H76NO8P | 765.5308 | 766.5387 | 766.5350 | [M+H] <sup>+</sup> | -4.83 | 35.08 | 1.53E+06 |
| PE(38:6) | C43H74NO8P | 763.5152 | 764.5230 | 764.5202 | [M+H] <sup>+</sup> | -3.67 | 31.55 | 1.71E+05 |
| PE(39:1) | C44H86NO8P | 787.6091 | 788.6169 | 788.6172 | [M+H] <sup>+</sup> | 0.43  | 53.15 | 1.83E+05 |
| PE(39:2) | C44H84NO8P | 785.5934 | 786.6012 | 786.5980 | [M+H] <sup>+</sup> | -4.09 | 41.38 | 4.49E+06 |
| PE(39:3) | C44H82NO8P | 783.5778 | 784.5856 | 784.5829 | [M+H] <sup>+</sup> | -3.45 | 39.38 | 4.98E+05 |
| PE(39:4) | C44H80NO8P | 781.5621 | 782.5700 | 782.5646 | [M+H] <sup>+</sup> | -6.90 | 38.37 | 9.01E+05 |
| PE(40:1) | C45H88NO8P | 801.6247 | 802.6325 | 802.6297 | [M+H] <sup>+</sup> | -3.53 | 47.65 | 1.76E+05 |
| PE(40:2) | C45H86NO8P | 799.6091 | 800.6169 | 800.6137 | [M+H] <sup>+</sup> | -3.99 | 40.42 | 1.63E+05 |
| PE(40:3) | C45H84NO8P | 797.5934 | 798.6012 | 798.5968 | [M+H] <sup>+</sup> | -5.54 | 38.23 | 2.43E+05 |
| PE(40:4) | C45H82NO8P | 795.5778 | 796.5856 | 796.5835 | [M+H] <sup>+</sup> | -2.63 | 43.72 | 9.37E+05 |
| PE(41:3) | C46H86NO8P | 811.6091 | 812.6169 | 812.6154 | [M+H] <sup>+</sup> | -1.89 | 49.38 | 7.31E+04 |
| PE(41:4) | C46H84NO8P | 809.5934 | 810.6012 | 810.5998 | [M+H] <sup>+</sup> | -1.79 | 25.64 | 2.19E+05 |
| PG(32:1) | C38H73O10P | 720.4941 | 719.4863 | 719.4898 | [M-H] <sup>-</sup> | 4.82  | 27.20 | 1.86E+04 |
| PG(34:1) | C40H77O10P | 748.5254 | 747.5176 | 747.5212 | [M-H] <sup>-</sup> | 4.84  | 29.42 | 7.41E+04 |
| PG(34:2) | C40H75O10P | 746.5098 | 745.5019 | 745.5037 | [M-H] <sup>-</sup> | 2.30  | 25.56 | 2.07E+04 |
| PG(36:2) | C42H79O10P | 774.5411 | 773.5332 | 773.5347 | [M-H] <sup>-</sup> | 1.87  | 28.97 | 2.85E+05 |
| PG(36:3) | C42H77O10P | 772.5254 | 771.5176 | 771.5190 | [M-H] <sup>-</sup> | 1.88  | 26.42 | 4.01E+04 |
| PG(36:4) | C42H75O10P | 770.5098 | 769.5019 | 769.5043 | [M-H] <sup>-</sup> | 3.02  | 24.79 | 3.32E+04 |
| PG(38:3) | C44H81O10P | 800.5567 | 799.5489 | 799.5512 | [M-H] <sup>-</sup> | 2.85  | 29.17 | 4.87E+04 |
| PG(38:4) | C44H79O10P | 798.5411 | 797.5332 | 797.5357 | [M-H] <sup>-</sup> | 3.13  | 28.35 | 5.30E+04 |

|           |             |          |          |          |                    |       |       |          |
|-----------|-------------|----------|----------|----------|--------------------|-------|-------|----------|
| PG(38:5)  | C44H77O10P  | 796.5254 | 795.5176 | 795.5187 | [M-H] <sup>-</sup> | 1.36  | 26.28 | 1.05E+05 |
| PG(38:6)  | C44H75O10P  | 794.5098 | 793.5019 | 793.5042 | [M-H] <sup>-</sup> | 2.87  | 24.46 | 2.27E+04 |
| PG(40:6)  | C46H79O10P  | 822.5411 | 821.5332 | 821.5353 | [M-H] <sup>-</sup> | 2.50  | 27.34 | 1.89E+05 |
| PG(40:7)  | C46H77O10P  | 820.5254 | 819.5176 | 819.5218 | [M-H] <sup>-</sup> | 5.12  | 24.66 | 2.00E+04 |
| PG(40:8)  | C46H75O10P  | 818.5098 | 817.5019 | 817.5037 | [M-H] <sup>-</sup> | 2.11  | 24.87 | 3.84E+05 |
| PG(42:10) | C48H75O10P  | 842.5098 | 841.5019 | 841.5039 | [M-H] <sup>-</sup> | 2.28  | 24.21 | 4.92E+04 |
| PG(42:7)  | C48H81O10P  | 848.5567 | 847.5489 | 847.5524 | [M-H] <sup>-</sup> | 4.16  | 27.70 | 3.72E+04 |
| PG(42:8)  | C48H79O10P  | 846.5411 | 845.5332 | 845.5339 | [M-H] <sup>-</sup> | 0.74  | 26.13 | 8.24E+04 |
| PG(42:9)  | C48H77O10P  | 844.5254 | 843.5176 | 843.5186 | [M-H] <sup>-</sup> | 1.17  | 25.40 | 8.54E+04 |
| PG(44:10) | C50H79O10P  | 870.5411 | 869.5332 | 869.5340 | [M-H] <sup>-</sup> | 0.93  | 26.31 | 6.22E+04 |
| PI(32:1)  | C41H77O13P  | 808.5102 | 807.5023 | 807.5039 | [M-H] <sup>-</sup> | 1.94  | 26.49 | 6.01E+04 |
| PI(34:2)  | C43H79O13P  | 834.5258 | 833.5180 | 833.5205 | [M-H] <sup>-</sup> | 3.00  | 27.23 | 5.75E+05 |
| PI(36:1)  | C45H85O13P  | 864.5728 | 863.5649 | 863.5733 | [M-H] <sup>-</sup> | 9.69  | 29.12 | 2.40E+04 |
| PI(36:2)  | C45H83O13P  | 862.5571 | 861.5493 | 861.5524 | [M-H] <sup>-</sup> | 3.65  | 30.25 | 1.68E+05 |
| PI(36:3)  | C45H81O13P  | 860.5415 | 859.5336 | 859.5363 | [M-H] <sup>-</sup> | 3.08  | 27.64 | 3.16E+05 |
| PI(36:4)  | C45H79O13P  | 858.5258 | 857.5180 | 857.5196 | [M-H] <sup>-</sup> | 1.93  | 27.34 | 1.02E+06 |
| PI(38:2)  | C47H87O13P  | 890.5884 | 889.5806 | 889.5886 | [M-H] <sup>-</sup> | 8.99  | 32.07 | 2.60E+04 |
| PI(38:3)  | C47H85O13P  | 888.5728 | 887.5649 | 887.5716 | [M-H] <sup>-</sup> | 7.48  | 30.41 | 4.77E+05 |
| PI(38:4)  | C47H83O13P  | 886.5571 | 885.5493 | 885.5502 | [M-H] <sup>-</sup> | 1.09  | 29.72 | 5.33E+06 |
| PI(38:5)  | C47H81O13P  | 884.5415 | 883.5336 | 883.5352 | [M-H] <sup>-</sup> | 1.80  | 27.53 | 2.49E+06 |
| PI(38:6)  | C47H79O13P  | 882.5258 | 881.5180 | 881.5183 | [M-H] <sup>-</sup> | 0.33  | 25.58 | 1.89E+04 |
| PI(40:4)  | C49H87O13P  | 914.5884 | 913.5806 | 913.5820 | [M-H] <sup>-</sup> | 1.59  | 31.27 | 2.84E+04 |
| PI(40:5)  | C49H85O13P  | 912.5728 | 911.5649 | 911.5664 | [M-H] <sup>-</sup> | 1.65  | 29.53 | 6.99E+04 |
| PI(40:6)  | C49H83O13P  | 910.5571 | 909.5493 | 909.5507 | [M-H] <sup>-</sup> | 1.59  | 27.45 | 5.97E+04 |
| PI(40:7)  | C49H81O13P  | 908.5415 | 907.5336 | 907.5355 | [M-H] <sup>-</sup> | 2.07  | 27.05 | 3.79E+04 |
| PS(27:0)  | C33H64NO10P | 665.4268 | 666.4346 | 666.4346 | [M+H] <sup>+</sup> | -0.05 | 15.65 | 6.29E+04 |
| PS(28:1)  | C34H64NO10P | 677.4268 | 678.4346 | 678.4343 | [M+H] <sup>+</sup> | -0.39 | 18.37 | 2.05E+04 |
| PS(34:1)  | C40H76NO10P | 761.5207 | 762.5285 | 762.5261 | [M+H] <sup>+</sup> | -3.11 | 30.76 | 5.86E+05 |
| PS(34:2)  | C40H74NO10P | 759.5050 | 760.5128 | 760.5108 | [M+H] <sup>+</sup> | -2.71 | 28.64 | 1.97E+05 |
| PS(36:1)  | C42H80NO10P | 789.5520 | 790.5598 | 790.5578 | [M+H] <sup>+</sup> | -2.54 | 31.00 | 9.24E+05 |



|           |             |          |          |          |                    |       |       |          |
|-----------|-------------|----------|----------|----------|--------------------|-------|-------|----------|
| PS(36:2)  | C42H78NO10P | 787.5363 | 788.5441 | 788.5410 | [M+H] <sup>+</sup> | -4.00 | 30.82 | 1.17E+06 |
| PS(38:2)  | C44H82NO10P | 815.5676 | 816.5754 | 816.5725 | [M+H] <sup>+</sup> | -3.63 | 35.05 | 1.73E+05 |
| PS(38:3)  | C44H80NO10P | 813.5520 | 814.5598 | 814.5554 | [M+H] <sup>+</sup> | -5.42 | 33.71 | 3.12E+05 |
| PS(38:4)  | C44H78NO10P | 811.5363 | 812.5441 | 812.5403 | [M+H] <sup>+</sup> | -4.71 | 31.93 | 2.22E+06 |
| PS(40:2)  | C46H86NO10P | 843.5989 | 844.6067 | 844.6052 | [M+H] <sup>+</sup> | -1.76 | 52.31 | 1.96E+04 |
| PS(40:3)  | C46H84NO10P | 841.5833 | 842.5911 | 842.5894 | [M+H] <sup>+</sup> | -1.96 | 28.67 | 1.21E+05 |
| PS(40:5)  | C46H80NO10P | 837.5520 | 838.5598 | 838.5587 | [M+H] <sup>+</sup> | -1.34 | 25.94 | 4.20E+05 |
| PS(40:6)  | C46H78NO10P | 835.5363 | 836.5441 | 836.5417 | [M+H] <sup>+</sup> | -2.86 | 24.68 | 2.98E+05 |
| PS(42:7)  | C48H80NO10P | 861.5520 | 862.5598 | 862.5584 | [M+H] <sup>+</sup> | -1.66 | 24.93 | 1.41E+05 |
| PS(44:10) | C50H78NO10P | 883.5363 | 884.5441 | 884.5419 | [M+H] <sup>+</sup> | -2.51 | 24.02 | 1.39E+05 |
| PS(44:8)  | C50H82NO10P | 887.5676 | 888.5754 | 888.5747 | [M+H] <sup>+</sup> | -0.84 | 25.97 | 1.76E+05 |
| SM(d30:1) | C35H71N2O6P | 646.5050 | 647.5128 | 647.5125 | [M+H] <sup>+</sup> | -0.35 | 25.33 | 9.56E+04 |
| SM(d32:0) | C37H77N2O6P | 676.5519 | 677.5597 | 677.5582 | [M+H] <sup>+</sup> | -2.31 | 30.19 | 4.12E+05 |
| SM(d32:1) | C37H75N2O6P | 674.5363 | 675.5441 | 675.5426 | [M+H] <sup>+</sup> | -2.23 | 29.90 | 9.71E+05 |
| SM(d32:2) | C37H73N2O6P | 672.5206 | 673.5284 | 673.5276 | [M+H] <sup>+</sup> | -1.17 | 25.69 | 1.98E+05 |
| SM(d33:1) | C38H77N2O6P | 688.5519 | 689.5597 | 689.5581 | [M+H] <sup>+</sup> | -2.31 | 29.34 | 7.80E+05 |
| SM(d34:0) | C39H81N2O6P | 704.5832 | 705.5910 | 705.5878 | [M+H] <sup>+</sup> | -4.51 | 35.50 | 5.69E+05 |
| SM(d34:1) | C39H79N2O6P | 702.5675 | 703.5754 | 703.5731 | [M+H] <sup>+</sup> | -3.19 | 33.43 | 3.15E+07 |
| SM(d34:2) | C39H77N2O6P | 700.5519 | 701.5597 | 701.5585 | [M+H] <sup>+</sup> | -1.68 | 27.81 | 6.00E+05 |
| SM(d36:1) | C41H83N2O6P | 730.5988 | 731.6067 | 731.6049 | [M+H] <sup>+</sup> | -2.42 | 38.33 | 1.60E+06 |
| SM(d36:2) | C41H81N2O6P | 728.5832 | 729.5910 | 729.5885 | [M+H] <sup>+</sup> | -3.50 | 33.74 | 5.88E+05 |
| SM(d40:1) | C45H91N2O6P | 786.6614 | 787.6693 | 787.6663 | [M+H] <sup>+</sup> | -3.80 | 51.02 | 1.71E+06 |
| SM(d41:1) | C46H93N2O6P | 800.6771 | 801.6849 | 801.6836 | [M+H] <sup>+</sup> | -1.66 | 47.66 | 4.59E+05 |
| SM(d41:2) | C46H91N2O6P | 798.6614 | 799.6693 | 799.6656 | [M+H] <sup>+</sup> | -4.60 | 47.03 | 1.78E+06 |
| SM(d42:1) | C47H95N2O6P | 814.6927 | 815.7006 | 815.6982 | [M+H] <sup>+</sup> | -2.93 | 51.61 | 4.50E+06 |
| SM(d42:2) | C47H93N2O6P | 812.6771 | 813.6849 | 813.6813 | [M+H] <sup>+</sup> | -4.48 | 50.37 | 1.62E+07 |
| SM(d42:3) | C47H91N2O6P | 810.6614 | 811.6693 | 811.6653 | [M+H] <sup>+</sup> | -4.93 | 44.77 | 3.60E+06 |
| SM(d43:2) | C48H95N2O6P | 826.6927 | 827.7006 | 827.6968 | [M+H] <sup>+</sup> | -4.51 | 47.18 | 2.60E+05 |
| SM(d44:1) | C49H99N2O6P | 842.7240 | 843.7319 | 843.7306 | [M+H] <sup>+</sup> | -1.52 | 56.81 | 1.22E+05 |
| SM(d44:2) | C49H97N2O6P | 840.7084 | 841.7162 | 841.7122 | [M+H] <sup>+</sup> | -4.83 | 50.19 | 1.11E+06 |

|          |                                                 |          |          |          |                                   |       |       |          |
|----------|-------------------------------------------------|----------|----------|----------|-----------------------------------|-------|-------|----------|
| TG(46:0) | C <sub>49</sub> H <sub>94</sub> O <sub>6</sub>  | 778.7050 | 796.7394 | 796.7362 | [M+NH <sub>4</sub> ] <sup>+</sup> | -3.94 | 64.75 | 3.43E+05 |
| TG(48:0) | C <sub>51</sub> H <sub>98</sub> O <sub>6</sub>  | 806.7363 | 824.7707 | 824.7687 | [M+NH <sub>4</sub> ] <sup>+</sup> | -2.43 | 66.55 | 2.37E+06 |
| TG(48:1) | C <sub>51</sub> H <sub>96</sub> O <sub>6</sub>  | 804.7207 | 822.7550 | 822.7520 | [M+NH <sub>4</sub> ] <sup>+</sup> | -3.65 | 64.85 | 2.21E+06 |
| TG(48:3) | C <sub>51</sub> H <sub>92</sub> O <sub>6</sub>  | 800.6894 | 818.7237 | 818.7203 | [M+NH <sub>4</sub> ] <sup>+</sup> | -4.15 | 61.96 | 5.92E+05 |
| TG(49:0) | C <sub>52</sub> H <sub>100</sub> O <sub>6</sub> | 820.7520 | 838.7863 | 838.7801 | [M+NH <sub>4</sub> ] <sup>+</sup> | -7.38 | 65.61 | 1.73E+05 |
| TG(49:1) | C <sub>52</sub> H <sub>98</sub> O <sub>6</sub>  | 818.7363 | 836.7707 | 836.7679 | [M+NH <sub>4</sub> ] <sup>+</sup> | -3.32 | 66.23 | 4.96E+05 |
| TG(49:2) | C <sub>52</sub> H <sub>96</sub> O <sub>6</sub>  | 816.7207 | 834.7550 | 834.7532 | [M+NH <sub>4</sub> ] <sup>+</sup> | -2.13 | 64.61 | 1.57E+05 |
| TG(50:0) | C <sub>53</sub> H <sub>102</sub> O <sub>6</sub> | 834.7676 | 852.8020 | 852.7995 | [M+NH <sub>4</sub> ] <sup>+</sup> | -2.94 | 69.11 | 4.62E+05 |
| TG(50:1) | C <sub>53</sub> H <sub>100</sub> O <sub>6</sub> | 832.7520 | 850.7863 | 850.7835 | [M+NH <sub>4</sub> ] <sup>+</sup> | -3.29 | 66.21 | 9.27E+06 |
| TG(50:2) | C <sub>53</sub> H <sub>98</sub> O <sub>6</sub>  | 830.7363 | 848.7707 | 848.7680 | [M+NH <sub>4</sub> ] <sup>+</sup> | -3.19 | 64.80 | 1.10E+07 |
| TG(50:3) | C <sub>53</sub> H <sub>96</sub> O <sub>6</sub>  | 828.7207 | 846.7550 | 846.7518 | [M+NH <sub>4</sub> ] <sup>+</sup> | -3.85 | 63.14 | 3.99E+06 |
| TG(50:4) | C <sub>53</sub> H <sub>94</sub> O <sub>6</sub>  | 826.7050 | 844.7394 | 844.7376 | [M+NH <sub>4</sub> ] <sup>+</sup> | -2.09 | 62.17 | 5.50E+05 |
| TG(50:5) | C <sub>53</sub> H <sub>92</sub> O <sub>6</sub>  | 824.6894 | 842.7237 | 842.7227 | [M+NH <sub>4</sub> ] <sup>+</sup> | -1.23 | 61.01 | 1.65E+05 |
| TG(51:0) | C <sub>54</sub> H <sub>104</sub> O <sub>6</sub> | 848.7832 | 866.8176 | 866.8166 | [M+NH <sub>4</sub> ] <sup>+</sup> | -1.18 | 69.35 | 1.23E+05 |
| TG(51:1) | C <sub>54</sub> H <sub>102</sub> O <sub>6</sub> | 846.7676 | 864.8020 | 864.8000 | [M+NH <sub>4</sub> ] <sup>+</sup> | -2.32 | 67.84 | 1.88E+05 |
| TG(51:2) | C <sub>54</sub> H <sub>100</sub> O <sub>6</sub> | 844.7520 | 862.7863 | 862.7836 | [M+NH <sub>4</sub> ] <sup>+</sup> | -3.15 | 66.24 | 4.18E+05 |
| TG(51:3) | C <sub>54</sub> H <sub>98</sub> O <sub>6</sub>  | 842.7363 | 860.7707 | 860.7681 | [M+NH <sub>4</sub> ] <sup>+</sup> | -2.97 | 64.71 | 3.80E+05 |
| TG(52:0) | C <sub>55</sub> H <sub>106</sub> O <sub>6</sub> | 862.7989 | 880.8333 | 880.8322 | [M+NH <sub>4</sub> ] <sup>+</sup> | -1.26 | 70.55 | 5.75E+05 |
| TG(52:1) | C <sub>55</sub> H <sub>104</sub> O <sub>6</sub> | 860.7832 | 878.8176 | 878.8160 | [M+NH <sub>4</sub> ] <sup>+</sup> | -1.89 | 69.17 | 6.49E+04 |
| TG(52:2) | C <sub>55</sub> H <sub>102</sub> O <sub>6</sub> | 858.7676 | 876.8020 | 876.8000 | [M+NH <sub>4</sub> ] <sup>+</sup> | -2.23 | 66.16 | 1.06E+07 |
| TG(52:3) | C <sub>55</sub> H <sub>100</sub> O <sub>6</sub> | 856.7520 | 874.7863 | 874.7873 | [M+NH <sub>4</sub> ] <sup>+</sup> | 1.15  | 62.92 | 5.82E+04 |
| TG(52:4) | C <sub>55</sub> H <sub>98</sub> O <sub>6</sub>  | 854.7363 | 872.7707 | 872.7676 | [M+NH <sub>4</sub> ] <sup>+</sup> | -3.53 | 64.84 | 4.57E+06 |
| TG(52:5) | C <sub>55</sub> H <sub>96</sub> O <sub>6</sub>  | 852.7207 | 870.7550 | 870.7533 | [M+NH <sub>4</sub> ] <sup>+</sup> | -1.99 | 62.45 | 1.61E+06 |
| TG(52:6) | C <sub>55</sub> H <sub>94</sub> O <sub>6</sub>  | 850.7050 | 868.7394 | 868.7360 | [M+NH <sub>4</sub> ] <sup>+</sup> | -3.86 | 61.96 | 6.52E+05 |
| TG(52:7) | C <sub>55</sub> H <sub>92</sub> O <sub>6</sub>  | 848.6894 | 866.7237 | 866.7217 | [M+NH <sub>4</sub> ] <sup>+</sup> | -2.33 | 61.03 | 1.14E+05 |
| TG(53:1) | C <sub>56</sub> H <sub>106</sub> O <sub>6</sub> | 874.7989 | 892.8333 | 892.8315 | [M+NH <sub>4</sub> ] <sup>+</sup> | -1.95 | 68.40 | 8.70E+04 |
| TG(53:2) | C <sub>56</sub> H <sub>104</sub> O <sub>6</sub> | 872.7832 | 890.8176 | 890.8150 | [M+NH <sub>4</sub> ] <sup>+</sup> | -2.96 | 66.63 | 1.75E+05 |

|          |                                                 |          |          |          |                                   |       |       |          |
|----------|-------------------------------------------------|----------|----------|----------|-----------------------------------|-------|-------|----------|
| TG(53:3) | C <sub>56</sub> H <sub>102</sub> O <sub>6</sub> | 870.7676 | 888.8020 | 888.7995 | [M+NH <sub>4</sub> ] <sup>+</sup> | -2.77 | 65.22 | 1.58E+05 |
| TG(53:5) | C <sub>56</sub> H <sub>98</sub> O <sub>6</sub>  | 866.7363 | 884.7707 | 884.7692 | [M+NH <sub>4</sub> ] <sup>+</sup> | -1.69 | 64.28 | 1.56E+05 |
| TG(53:6) | C <sub>56</sub> H <sub>96</sub> O <sub>6</sub>  | 864.7207 | 882.7550 | 882.7543 | [M+NH <sub>4</sub> ] <sup>+</sup> | -0.85 | 62.53 | 8.90E+04 |
| TG(54:0) | C <sub>57</sub> H <sub>110</sub> O <sub>6</sub> | 890.8302 | 908.8646 | 908.8635 | [M+NH <sub>4</sub> ] <sup>+</sup> | -1.21 | 72.21 | 5.39E+04 |
| TG(54:1) | C <sub>57</sub> H <sub>108</sub> O <sub>6</sub> | 888.8145 | 906.8489 | 906.8490 | [M+NH <sub>4</sub> ] <sup>+</sup> | 0.14  | 69.53 | 5.21E+05 |
| TG(54:2) | C <sub>57</sub> H <sub>106</sub> O <sub>6</sub> | 886.7989 | 904.8333 | 904.8321 | [M+NH <sub>4</sub> ] <sup>+</sup> | -1.29 | 68.75 | 2.09E+05 |
| TG(54:3) | C <sub>57</sub> H <sub>104</sub> O <sub>6</sub> | 884.7832 | 902.8176 | 902.8170 | [M+NH <sub>4</sub> ] <sup>+</sup> | -0.72 | 68.63 | 7.79E+04 |
| TG(54:4) | C <sub>57</sub> H <sub>102</sub> O <sub>6</sub> | 882.7676 | 900.8020 | 900.7968 | [M+NH <sub>4</sub> ] <sup>+</sup> | -5.71 | 65.16 | 8.61E+06 |
| TG(54:5) | C <sub>57</sub> H <sub>100</sub> O <sub>6</sub> | 880.7520 | 898.7863 | 898.7826 | [M+NH <sub>4</sub> ] <sup>+</sup> | -4.11 | 63.90 | 9.13E+06 |
| TG(54:6) | C <sub>57</sub> H <sub>98</sub> O <sub>6</sub>  | 878.7363 | 896.7707 | 896.7677 | [M+NH <sub>4</sub> ] <sup>+</sup> | -3.30 | 62.78 | 2.94E+06 |
| TG(54:7) | C <sub>57</sub> H <sub>96</sub> O <sub>6</sub>  | 876.7207 | 894.7550 | 894.7535 | [M+NH <sub>4</sub> ] <sup>+</sup> | -1.72 | 61.69 | 5.13E+05 |
| TG(54:8) | C <sub>57</sub> H <sub>94</sub> O <sub>6</sub>  | 874.7050 | 892.7394 | 892.7377 | [M+NH <sub>4</sub> ] <sup>+</sup> | -1.83 | 60.68 | 1.46E+05 |
| TG(54:9) | C <sub>57</sub> H <sub>92</sub> O <sub>6</sub>  | 872.6894 | 890.7237 | 890.7214 | [M+NH <sub>4</sub> ] <sup>+</sup> | -2.60 | 59.10 | 2.06E+04 |
| TG(55:1) | C <sub>58</sub> H <sub>110</sub> O <sub>6</sub> | 902.8302 | 920.8646 | 920.8657 | [M+NH <sub>4</sub> ] <sup>+</sup> | 1.24  | 69.82 | 3.04E+04 |
| TG(55:2) | C <sub>58</sub> H <sub>108</sub> O <sub>6</sub> | 900.8145 | 918.8489 | 918.8470 | [M+NH <sub>4</sub> ] <sup>+</sup> | -2.13 | 68.21 | 8.47E+04 |
| TG(55:3) | C <sub>58</sub> H <sub>106</sub> O <sub>6</sub> | 898.7989 | 916.8333 | 916.8303 | [M+NH <sub>4</sub> ] <sup>+</sup> | -3.21 | 66.71 | 1.53E+05 |
| TG(55:4) | C <sub>58</sub> H <sub>104</sub> O <sub>6</sub> | 896.7832 | 914.8176 | 914.8142 | [M+NH <sub>4</sub> ] <sup>+</sup> | -3.75 | 66.65 | 1.91E+05 |
| TG(55:5) | C <sub>58</sub> H <sub>102</sub> O <sub>6</sub> | 894.7676 | 912.8020 | 912.7977 | [M+NH <sub>4</sub> ] <sup>+</sup> | -4.69 | 64.86 | 1.74E+05 |
| TG(55:6) | C <sub>58</sub> H <sub>100</sub> O <sub>6</sub> | 892.7520 | 910.7863 | 910.7841 | [M+NH <sub>4</sub> ] <sup>+</sup> | -2.46 | 63.70 | 1.04E+05 |
| TG(56:0) | C <sub>59</sub> H <sub>114</sub> O <sub>6</sub> | 918.8615 | 936.8959 | 936.8992 | [M+NH <sub>4</sub> ] <sup>+</sup> | 3.57  | 73.37 | 2.41E+04 |
| TG(56:1) | C <sub>59</sub> H <sub>112</sub> O <sub>6</sub> | 916.8458 | 934.8802 | 934.8802 | [M+NH <sub>4</sub> ] <sup>+</sup> | 0.00  | 70.03 | 4.95E+04 |
| TG(56:2) | C <sub>59</sub> H <sub>110</sub> O <sub>6</sub> | 914.8302 | 932.8646 | 932.8619 | [M+NH <sub>4</sub> ] <sup>+</sup> | -2.82 | 69.22 | 8.53E+05 |
| TG(56:3) | C <sub>59</sub> H <sub>108</sub> O <sub>6</sub> | 912.8145 | 930.8489 | 930.8453 | [M+NH <sub>4</sub> ] <sup>+</sup> | -3.91 | 68.13 | 1.03E+06 |
| TG(56:4) | C <sub>59</sub> H <sub>106</sub> O <sub>6</sub> | 910.7989 | 928.8333 | 928.8292 | [M+NH <sub>4</sub> ] <sup>+</sup> | -4.37 | 66.98 | 3.70E+06 |
| TG(56:5) | C <sub>59</sub> H <sub>104</sub> O <sub>6</sub> | 908.7832 | 926.8176 | 926.8141 | [M+NH <sub>4</sub> ] <sup>+</sup> | -3.79 | 65.70 | 7.93E+06 |
| TG(56:6) | C <sub>59</sub> H <sub>102</sub> O <sub>6</sub> | 906.7676 | 924.8020 | 924.7980 | [M+NH <sub>4</sub> ] <sup>+</sup> | -4.33 | 65.11 | 4.15E+06 |
| TG(56:7) | C <sub>59</sub> H <sub>100</sub> O <sub>6</sub> | 904.7520 | 922.7863 | 922.7809 | [M+NH <sub>4</sub> ] <sup>+</sup> | -5.86 | 62.96 | 3.89E+06 |

|           |                                                 |          |          |          |                                   |       |       |          |
|-----------|-------------------------------------------------|----------|----------|----------|-----------------------------------|-------|-------|----------|
| TG(56:8)  | C <sub>59</sub> H <sub>98</sub> O <sub>6</sub>  | 902.7363 | 920.7707 | 920.7678 | [M+NH <sub>4</sub> ] <sup>+</sup> | -3.08 | 63.19 | 1.94E+06 |
| TG(56:9)  | C <sub>59</sub> H <sub>96</sub> O <sub>6</sub>  | 900.7207 | 918.7550 | 918.7542 | [M+NH <sub>4</sub> ] <sup>+</sup> | -0.86 | 60.87 | 1.11E+05 |
| TG(57:1)  | C <sub>60</sub> H <sub>114</sub> O <sub>6</sub> | 930.8615 | 948.8959 | 948.8965 | [M+NH <sub>4</sub> ] <sup>+</sup> | 0.71  | 70.82 | 5.04E+04 |
| TG(58:0)  | C <sub>61</sub> H <sub>118</sub> O <sub>6</sub> | 946.8928 | 964.9272 | 964.9264 | [M+NH <sub>4</sub> ] <sup>+</sup> | -0.82 | 75.07 | 1.48E+04 |
| TG(58:1)  | C <sub>61</sub> H <sub>116</sub> O <sub>6</sub> | 944.8771 | 962.9115 | 962.9104 | [M+NH <sub>4</sub> ] <sup>+</sup> | -1.16 | 71.21 | 8.81E+04 |
| TG(58:10) | C <sub>61</sub> H <sub>98</sub> O <sub>6</sub>  | 926.7363 | 944.7707 | 944.7686 | [M+NH <sub>4</sub> ] <sup>+</sup> | -2.19 | 62.18 | 4.18E+05 |
| TG(58:2)  | C <sub>61</sub> H <sub>114</sub> O <sub>6</sub> | 942.8615 | 960.8959 | 960.8947 | [M+NH <sub>4</sub> ] <sup>+</sup> | -1.23 | 70.56 | 3.85E+05 |
| TG(58:3)  | C <sub>61</sub> H <sub>112</sub> O <sub>6</sub> | 940.8458 | 958.8802 | 958.8766 | [M+NH <sub>4</sub> ] <sup>+</sup> | -3.80 | 68.57 | 4.51E+05 |
| TG(58:4)  | C <sub>61</sub> H <sub>110</sub> O <sub>6</sub> | 938.8302 | 956.8646 | 956.8589 | [M+NH <sub>4</sub> ] <sup>+</sup> | -5.89 | 67.64 | 6.58E+05 |
| TG(58:5)  | C <sub>61</sub> H <sub>108</sub> O <sub>6</sub> | 936.8145 | 954.8489 | 954.8468 | [M+NH <sub>4</sub> ] <sup>+</sup> | -2.23 | 67.37 | 1.77E+06 |
| TG(58:6)  | C <sub>61</sub> H <sub>106</sub> O <sub>6</sub> | 934.7989 | 952.8333 | 952.8294 | [M+NH <sub>4</sub> ] <sup>+</sup> | -4.10 | 66.17 | 1.54E+06 |
| TG(58:7)  | C <sub>61</sub> H <sub>104</sub> O <sub>6</sub> | 932.7832 | 950.8176 | 950.8119 | [M+NH <sub>4</sub> ] <sup>+</sup> | -6.02 | 64.56 | 2.70E+06 |
| TG(58:8)  | C <sub>61</sub> H <sub>102</sub> O <sub>6</sub> | 930.7676 | 948.8020 | 948.7985 | [M+NH <sub>4</sub> ] <sup>+</sup> | -3.61 | 64.04 | 6.08E+06 |
| TG(58:9)  | C <sub>61</sub> H <sub>100</sub> O <sub>6</sub> | 928.7520 | 946.7863 | 946.7830 | [M+NH <sub>4</sub> ] <sup>+</sup> | -3.51 | 63.20 | 1.28E+06 |
| TG(59:2)  | C <sub>62</sub> H <sub>116</sub> O <sub>6</sub> | 956.8771 | 974.9115 | 974.9104 | [M+NH <sub>4</sub> ] <sup>+</sup> | -1.10 | 70.68 | 5.99E+04 |
| TG(59:4)  | C <sub>62</sub> H <sub>112</sub> O <sub>6</sub> | 952.8458 | 970.8802 | 970.8774 | [M+NH <sub>4</sub> ] <sup>+</sup> | -2.91 | 68.87 | 1.75E+04 |
| TG(60:0)  | C <sub>63</sub> H <sub>122</sub> O <sub>6</sub> | 974.9241 | 992.9585 | 992.9589 | [M+NH <sub>4</sub> ] <sup>+</sup> | 0.41  | 76.33 | 1.01E+04 |
| TG(60:1)  | C <sub>63</sub> H <sub>120</sub> O <sub>6</sub> | 972.9084 | 990.9428 | 990.9411 | [M+NH <sub>4</sub> ] <sup>+</sup> | -1.77 | 72.41 | 3.87E+04 |
| TG(60:10) | C <sub>63</sub> H <sub>102</sub> O <sub>6</sub> | 954.7676 | 972.8020 | 972.7977 | [M+NH <sub>4</sub> ] <sup>+</sup> | -4.36 | 63.15 | 1.25E+06 |
| TG(60:11) | C <sub>63</sub> H <sub>100</sub> O <sub>6</sub> | 952.7520 | 970.7863 | 970.7841 | [M+NH <sub>4</sub> ] <sup>+</sup> | -2.27 | 62.46 | 4.47E+05 |
| TG(60:12) | C <sub>63</sub> H <sub>98</sub> O <sub>6</sub>  | 950.7363 | 968.7707 | 968.7700 | [M+NH <sub>4</sub> ] <sup>+</sup> | -0.67 | 60.88 | 1.05E+05 |
| TG(60:2)  | C <sub>63</sub> H <sub>118</sub> O <sub>6</sub> | 970.8928 | 988.9272 | 988.9266 | [M+NH <sub>4</sub> ] <sup>+</sup> | -0.54 | 70.80 | 1.12E+05 |
| TG(60:3)  | C <sub>63</sub> H <sub>116</sub> O <sub>6</sub> | 968.8771 | 986.9115 | 986.9094 | [M+NH <sub>4</sub> ] <sup>+</sup> | -2.15 | 69.92 | 6.34E+05 |
| TG(60:4)  | C <sub>63</sub> H <sub>114</sub> O <sub>6</sub> | 966.8615 | 984.8959 | 984.8931 | [M+NH <sub>4</sub> ] <sup>+</sup> | -2.78 | 69.00 | 4.09E+05 |
| TG(60:5)  | C <sub>63</sub> H <sub>112</sub> O <sub>6</sub> | 964.8458 | 982.8802 | 982.8775 | [M+NH <sub>4</sub> ] <sup>+</sup> | -2.80 | 67.90 | 2.87E+05 |
| TG(60:6)  | C <sub>63</sub> H <sub>110</sub> O <sub>6</sub> | 962.8302 | 980.8646 | 980.8629 | [M+NH <sub>4</sub> ] <sup>+</sup> | -1.73 | 67.69 | 3.22E+05 |
| TG(60:7)  | C <sub>63</sub> H <sub>108</sub> O <sub>6</sub> | 960.8145 | 978.8489 | 978.8453 | [M+NH <sub>4</sub> ] <sup>+</sup> | -3.69 | 65.96 | 3.31E+05 |

|           |                                                 |           |           |           |                                   |       |       |          |
|-----------|-------------------------------------------------|-----------|-----------|-----------|-----------------------------------|-------|-------|----------|
| TG(60:8)  | C <sub>63</sub> H <sub>106</sub> O <sub>6</sub> | 958.7989  | 976.8333  | 976.8295  | [M+NH <sub>4</sub> ] <sup>+</sup> | -3.86 | 65.71 | 1.72E+06 |
| TG(60:9)  | C <sub>63</sub> H <sub>104</sub> O <sub>6</sub> | 956.7832  | 974.8176  | 974.8144  | [M+NH <sub>4</sub> ] <sup>+</sup> | -3.33 | 64.58 | 9.64E+05 |
| TG(61:3)  | C <sub>64</sub> H <sub>118</sub> O <sub>6</sub> | 982.8928  | 1000.9272 | 1000.9264 | [M+NH <sub>4</sub> ] <sup>+</sup> | -0.78 | 70.23 | 1.09E+04 |
| TG(62:0)  | C <sub>65</sub> H <sub>126</sub> O <sub>6</sub> | 1002.9554 | 1020.9898 | 1020.9912 | [M+NH <sub>4</sub> ] <sup>+</sup> | 1.36  | 78.27 | 1.58E+04 |
| TG(62:1)  | C <sub>65</sub> H <sub>124</sub> O <sub>6</sub> | 1000.9397 | 1018.9741 | 1018.9724 | [M+NH <sub>4</sub> ] <sup>+</sup> | -1.67 | 73.69 | 1.06E+04 |
| TG(62:10) | C <sub>65</sub> H <sub>106</sub> O <sub>6</sub> | 982.7989  | 1000.8333 | 1000.8298 | [M+NH <sub>4</sub> ] <sup>+</sup> | -3.48 | 64.23 | 3.92E+05 |
| TG(62:12) | C <sub>65</sub> H <sub>102</sub> O <sub>6</sub> | 978.7676  | 996.8020  | 996.7994  | [M+NH <sub>4</sub> ] <sup>+</sup> | -2.56 | 62.04 | 1.48E+05 |
| TG(62:2)  | C <sub>65</sub> H <sub>122</sub> O <sub>6</sub> | 998.9241  | 1016.9585 | 1016.9593 | [M+NH <sub>4</sub> ] <sup>+</sup> | 0.81  | 71.96 | 5.54E+04 |
| TG(62:3)  | C <sub>65</sub> H <sub>120</sub> O <sub>6</sub> | 996.9084  | 1014.9428 | 1014.9406 | [M+NH <sub>4</sub> ] <sup>+</sup> | -2.18 | 70.61 | 3.53E+04 |
| TG(62:5)  | C <sub>65</sub> H <sub>116</sub> O <sub>6</sub> | 992.8771  | 1010.9115 | 1010.9098 | [M+NH <sub>4</sub> ] <sup>+</sup> | -1.67 | 69.32 | 2.33E+05 |
| TG(62:6)  | C <sub>65</sub> H <sub>114</sub> O <sub>6</sub> | 990.8615  | 1008.8959 | 1008.8927 | [M+NH <sub>4</sub> ] <sup>+</sup> | -3.11 | 68.81 | 2.24E+05 |
| TG(62:7)  | C <sub>65</sub> H <sub>112</sub> O <sub>6</sub> | 988.8458  | 1006.8802 | 1006.8784 | [M+NH <sub>4</sub> ] <sup>+</sup> | -1.77 | 67.76 | 9.34E+04 |
| TG(62:9)  | C <sub>65</sub> H <sub>108</sub> O <sub>6</sub> | 984.8145  | 1002.8489 | 1002.8458 | [M+NH <sub>4</sub> ] <sup>+</sup> | -3.11 | 65.34 | 1.98E+05 |
| TG(64:12) | C <sub>67</sub> H <sub>106</sub> O <sub>6</sub> | 1006.7989 | 1024.8333 | 1024.8300 | [M+NH <sub>4</sub> ] <sup>+</sup> | -3.18 | 63.49 | 8.02E+04 |
| TG(64:2)  | C <sub>67</sub> H <sub>126</sub> O <sub>6</sub> | 1026.9554 | 1044.9898 | 1044.9884 | [M+NH <sub>4</sub> ] <sup>+</sup> | -1.29 | 73.08 | 4.02E+04 |
| TG(64:3)  | C <sub>67</sub> H <sub>124</sub> O <sub>6</sub> | 1024.9397 | 1042.9741 | 1042.9736 | [M+NH <sub>4</sub> ] <sup>+</sup> | -0.51 | 71.66 | 1.99E+04 |
| TG(64:4)  | C <sub>67</sub> H <sub>122</sub> O <sub>6</sub> | 1022.9241 | 1040.9585 | 1040.9532 | [M+NH <sub>4</sub> ] <sup>+</sup> | -5.09 | 70.87 | 2.95E+04 |
| TG(64:5)  | C <sub>67</sub> H <sub>120</sub> O <sub>6</sub> | 1020.9084 | 1038.9428 | 1038.9406 | [M+NH <sub>4</sub> ] <sup>+</sup> | -2.15 | 71.28 | 5.30E+04 |
| TG(64:6)  | C <sub>67</sub> H <sub>118</sub> O <sub>6</sub> | 1018.8928 | 1036.9272 | 1036.9244 | [M+NH <sub>4</sub> ] <sup>+</sup> | -2.64 | 69.29 | 6.94E+04 |
| TG(64:7)  | C <sub>67</sub> H <sub>116</sub> O <sub>6</sub> | 1016.8771 | 1034.9115 | 1034.9099 | [M+NH <sub>4</sub> ] <sup>+</sup> | -1.60 | 68.41 | 6.11E+04 |
| TG(64:9)  | C <sub>67</sub> H <sub>112</sub> O <sub>6</sub> | 1012.8458 | 1030.8802 | 1030.8772 | [M+NH <sub>4</sub> ] <sup>+</sup> | -2.92 | 66.96 | 1.35E+05 |
| TG(66:2)  | C <sub>69</sub> H <sub>130</sub> O <sub>6</sub> | 1054.9867 | 1073.0211 | 1073.0204 | [M+NH <sub>4</sub> ] <sup>+</sup> | -0.65 | 74.08 | 3.28E+04 |
| TG(66:3)  | C <sub>69</sub> H <sub>128</sub> O <sub>6</sub> | 1052.9710 | 1071.0054 | 1071.0037 | [M+NH <sub>4</sub> ] <sup>+</sup> | -1.57 | 72.74 | 3.98E+04 |
